# Supplementary material for: The transcriptional and splicing landscape of intestinal organoids undergoing nutrient starvation or endoplasmic reticulum stress
Source: BMC Genomics. 2016 Aug 26;17(1):680. doi: 10.1186/s12864-016-2999-1 (PMC5000506; doi:10.1186/s12864-016-2999-1)
Supplement: Additional file 6: Table S3 — Alternative splicing events in murine enteroids upon either ER stress or nutrient starvation. (XLSX 933 kb) [file 12864_2016_2999_MOESM6_ESM.xlsx]

## Sheet: Highest expression - Thapsi
	Sheet 1 of 4 - Analysis of most highly expressed genes associated with metabolism and innate immunity upon thapsigargin treatment
						CTR	Gm15284	134213	200973	97643.6	144277	THAPSI	Gm15284	59604.3	195365	70206.7	108392
			CTR				Defa24	55222.5	66813.8	33304.7	51780.3		Defa24	24964.6	70533.3	26386	40628
		Gene	Rank	Reads			mt-Co1	20702.8	11966.3	23543.8	18737.6		mt-Co1	20049.6	14131.6	21823.7	18668.3
		Gm15284	1	144277	Defense		mt-Atp6	16895	11262	19984.5	16047.2		mt-Atp6	14577.8	10381.3	15653.7	13537.6
		Defa24	2	51780.3	Defense		mt-Co2	13413.6	9164.3	15978.6	12852.2		mt-Co2	11578.4	10259.7	14117.3	11985.1
		Eef1a1	11	7386.1	Translation		Rplp1	8254.82	13849.4	7254.4	9786.21		Rplp1	7376.43	12087.9	6316.03	8593.47
		Aldob	12	7260.9	Metabolism		mt-Co3	9768.68	7821.7	10714.4	9434.92		mt-Co3	8822.03	7290.95	8514.37	8209.12
		Fabp1	13	6972.1	Metabolism		Gm14851	6244.99	13211	8612.83	9356.28		mt-Atp8	6894.03	5492.77	8057.26	6814.69
		Mt1	18	3498.5	Metabolism		mt-Atp8	8317.1	6417.78	9994.07	8242.98		Eef1a1	6812.21	8272.85	4804.82	6629.96
		Lgals4	24	3030.6	Metabolism		Rpl32	7026.35	10367.3	4923.13	7438.92		Rpl32	6035.75	9155.63	3895.78	6362.39
		Aldoa	26	2839.4	Metabolism		Eef1a1	6788.17	9601.46	5768.74	7386.12		Gm14851	2350.24	10614.7	4925.11	5963.34
		Mt2	27	2501	Metabolism		Aldob	7399.44	3302.82	11080.4	7260.89		Rps6	5866.58	7770.13	3318.93	5651.88
		Gstp1	29	2391.6	Metabolism		Fabp1	2676.46	6365.73	11874.1	6972.1		Aldob	4834.07	1823.63	8437.18	5031.63
		Tpt1	30	2276.8	Metabolism		Rps6	6055.96	8599.73	3907.06	6187.58		Gm10925	4649.02	3319.64	5073	4347.22
		Ldha	34	2076.6	Metabolism		Gm10925	5438.17	3610.72	6347.28	5132.06		mt-Nd1	3230.4	2052.14	5198.24	3493.59
		Gsta1	36	1970.2	Metabolism		mt-Nd1	4095.76	2615.48	6861.56	4524.27		Rpl3	2942.26	4879.53	2406.24	3409.34
		Lyz1	38	1909.5	Defense		Gm7861	3000.85	6171.3	3845.29	4339.15		Mt2	4373.02	2394.02	3285.71	3350.92
		Fth1	40	1875.9	Metabolism		Mt1	4593.35	1671.25	4230.79	3498.46		Mt1	3750.41	2415.82	3295.31	3153.85
		Lgals2	42	1856.5	Metabolism		Rpl3	2875.34	4854.39	2509.33	3413.02		Rpl26	2937.93	3781.65	1828.31	2849.3
							Rpl26	3294.48	4396.61	2291.03	3327.37		mt-Cytb	3449.07	2125.32	2810.42	2794.94
							Rpl7	3066.12	4482.17	2419.74	3322.68		Gm7861	1043.28	4810.38	2377.02	2743.56
							Gm10076	2624.23	4495.15	2475.23	3198.2		Rpl7	2773.17	3638.01	1808.75	2739.98
			Thapsi				mt-Cytb	3721.84	2006.42	3631.24	3119.83		Rpl36	2319.86	3273.63	1838.96	2477.48
		Gene	Rank	Reads			Lgals4	3544.72	2827.33	2719.76	3030.6		Fabp1	1235.04	1836.17	4239.53	2436.91
		Gm15284	1	108392	Defense		Rpl36	2755.43	4120.31	1993.07	2956.27		Gm10076	1794.76	3035.07	1853.72	2227.85
		Defa24	2	40628	Defense		Aldoa	2100.2	3828.12	2589.96	2839.43		AC110247.1	1926.05	2496.99	2178.11	2200.38
		Eef1a1	9	6630	Translation		Mt2	3674.99	1066.11	2763.25	2501.45		Aldoa	1431.3	2849.89	2309.82	2197
		Aldob	13	5032	Metabolism		Rps26	2118.25	3426.75	1713.99	2419.66		Tpt1	2398.38	2656.65	1443.85	2166.29
		Mt1	17	3351	Metabolism		Gstp1	2155.23	2544.77	2474.68	2391.56		Rps14	2019.25	2680.46	1235.51	1978.41
		Mt2	18	3154	Metabolism		Tpt1	2377.91	2844.99	1607.52	2276.81		Lgals4	2569.08	1552.68	1811.54	1977.77
		Fabp1	24	2437	Metabolism		Rps14	2181.29	3041.95	1546.87	2256.7		Rpl35a	1844.93	2649.45	1202.93	1899.1
		Aldoa	27	2197	Metabolism		Rpl35a	2032.36	2908.65	1527.13	2156.05		Hspa5	2808.88	1636.5	1165.73	1870.37
		Tpt1	28	2166	Metabolism		Rps25	1945.31	2820.26	1535.07	2100.21		Rps26	1674.17	2549.55	1362.85	1862.19
		Lgals4	30	1978	Metabolism		Ldha	1771.22	2144.49	2314.18	2076.63		Rpl13a	1685.17	2613.17	1230.83	1843.06
		Hspa5	32	1870	ER stress		Rpl13a	1778.47	2800.53	1336.31	1971.77		mt-Nd4	2120.65	1148.98	1957.7	1742.44
		Apoa1	36	1651	Metabolism		Gsta1	2385.68	961.83	2563.18	1970.23		Apoa1	1375.14	509.07	3069.19	1651.13
		Ftl1	37	1634	Metabolism		mt-Nd4	2223.3	1136.91	2406.49	1922.23		Ftl1	1798.19	1407.62	1697.04	1634.28
		Gsta1	39	1578	Metabolism		Lyz1	1991.01	1885.13	1852.41	1909.52		Rplp0	1542.31	2285.9	1014.01	1614.07
		Ldha	40	1552	Metabolism		Rps17	1802.19	2588.14	1270.46	1886.93		Gsta1	1862.99	645.06	2225.85	1577.97
		Actg1	42	1493	Cytoskeleton		Fth1	1476.84	1905.73	2245.18	1875.92		Ldha	1249.08	1536.41	1869.73	1551.74
							Rplp0	1705.5	2685.18	1192.96	1861.21		Rps17	1482.24	2077.52	955.18	1504.98
							Lgals2	1933.66	2402.54	1233.44	1856.55		Actg1	1636.12	1521.93	1321.87	1493.31
							Gpi1	1309.96	2153.08	2099.71	1854.25		Rpl4	1430.72	2051.69	989	1490.47
							2210415F13Rik	918.78	1740.84	2795.26	1818.29		Rps25	1276.97	2098.39	1082.78	1486.05
							Actb	2072.7	1594.4	1695.65	1787.58		Fth1	1118.51	1507.31	1820.54	1482.12
							mt-Nd2	1652.48	1101.31	2556.38	1770.06		Rpl10a	1339.42	2063.16	1030.84	1477.81
							Rps11	1652.87	2359.58	1296.22	1769.56		Rps11	1402.01	1960.45	1068.99	1477.15
							Rps4x	1635.18	2383	1166.6	1728.26		Rpl5	1598.97	1951.8	822.59	1457.79
							Actg1	2232.48	1792.91	1096.45	1707.28		mt-Nd2	1390.78	1032.07	1929.2	1450.68
							Ptma	1338.99	2194.2	1516.5	1683.23		Gpi1	893.48	1581.29	1850.53	1441.77
							Gstm1	1964.96	1858.27	1210.27	1677.83		Actb	1740.23	1087.49	1315.67	1381.13
							Rps29	1608.18	2227.45	1103.9	1646.51		Lyz1	858.13	2072.54	1194.3	1374.99
							Rps15	1594.06	2293.72	1042.15	1643.31		mt-Nd5	1634.89	1143.52	1331.37	1369.93
							Rpl4	1432.72	2246.79	1147.82	1609.11		Apoa4	764.65	554.42	2777.12	1365.4
							Hspa8	2311.73	1363.8	1143.7	1606.41		Rps29	1414.19	1744.73	932.76	1363.89
							2210404O07Rik	1722.92	1229.23	1852.38	1601.51		Krt8	1697.26	1312.37	1080.1	1363.24
							Krt8	1942.41	1654.73	1200.19	1599.11		Gstp1	1365.15	1218.31	1430.24	1337.9
							AC110247.1	1093.17	2201.65	1501.1	1598.64		Rps4x	1259.96	1836.17	844.38	1313.5
							Apoa1	1181.98	530.15	3052.75	1588.29		Rps9	1283.4	1717.92	887.8	1296.37
							Ftl1	1842.22	1551.89	1305.53	1566.55		Rpl13	1258.56	1756.29	803.67	1272.84
							Rpl10a	1365.39	2195.08	1101.79	1554.09		Rpl8	1268.06	1643.54	868.02	1259.87
							Rpl5	1590.75	2054.59	982.3	1542.55		Eef2	1265.53	1451.74	1050.44	1255.9
							Atp1a1	1943.99	1173.88	1466.28	1528.05		2210404O07Rik	1480.59	873.23	1411.92	1255.25
							Atp5b	1329.22	1684.47	1510.82	1508.17		mt-Nd6	1440.39	1095.6	1204.7	1246.9
							Rpl13	1396.97	2139.65	955.61	1497.41		Rps15	1204.05	1659.53	790.25	1217.94
							Rpl8	1409.98	1987.62	1013.12	1470.24		Atp5b	1174.07	1293.05	1186.05	1217.72
							mt-Nd5	1651.79	996.13	1731.02	1459.65		Gnb2l1	1256.58	1636.7	732.57	1208.62
							Apoa4	840.12	507.72	2998.7	1448.85		Oat	854.12	1219.31	1493.79	1189.07
							Reg1	251.43	313	3750.35	1438.26		Rps16	1178.49	1613.09	762.79	1184.79
							Tff3	1895.78	1145.13	1251.24	1430.72		Rpl28	1224.19	1566.87	747.97	1179.68
							Rps9	1346.56	1950.46	984.84	1427.29		Rps10	1176.75	1628.4	704.91	1170.02
							Adh1	595.48	1107.64	2535.84	1412.99		Rps24	1186.1	1610.45	692.01	1162.85
							Rps10	1361.35	1955.59	885.94	1400.96		2210415F13Rik	689.5	1007.1	1694.08	1130.23
							Rps24	1347.05	1884.59	906.07	1379.24		Cyp2c68	795.69	1049.59	1379.2	1074.83
							Rpl28	1312.23	1934.36	885.05	1377.21		Rpl19	1087.45	1385.06	722.41	1064.97
							Rps16	1266.23	1956.19	894.03	1372.15		Krt19	1407.52	897.76	831.59	1045.62
							mt-Nd6	1500.56	964.03	1562.64	1342.41		Tff3	1161.87	865.69	1105.68	1044.41
							Eef2	1184.64	1665.94	1147.54	1332.71		Pgk1	654.7	1263.07	1058.96	992.243
							Gnb2l1	1288.07	1786.93	842.25	1305.75		Ces2c	1062.91	523.84	1387.18	991.31
							Eno1	1008.74	1405.03	1456.09	1289.95		Eno1	738.15	961.64	1192.4	964.063
							Krt19	1481.56	1325.48	984.06	1263.7		Hspa8	1148.33	996.93	732.16	959.14
							Oat	861.85	1300.26	1605.77	1255.96		Rps5	1011.23	1233.33	593.15	945.903
							Dbi	959.65	1177.15	1610.06	1248.95		Sis	955.19	400.35	1420.28	925.273
							Rpl19	1212.83	1649.73	880.97	1247.84		Mdh2	779.35	823.59	1166.73	923.223
							Gstm3	1467.18	1290.36	939.36	1232.3		Spink4	645.84	1316.56	774.48	912.293
							Rps2	958.4	1816.02	890.77	1221.73		Rps2	779.84	1253.7	682.87	905.47
							Pgk1	763.6	1637.55	1255.09	1218.75		Rps23	849.79	1295.31	550.5	898.533
							Pkm2	910.14	1365.52	1191.19	1155.62		Rpl23	940.47	1172.77	562.58	891.94
							Prap1	645.05	990.99	1772.15	1136.06		S100g	708.17	647.51	1311.61	889.097
							Mdh2	790.02	1119.22	1437.47	1115.57		Pkm2	622.37	1004.17	1008.89	878.477
							Spink4	1137.52	1302.93	859.57	1100.01		P4hb	950.7	759.69	900.7	870.363
							Cyp2c68	922.31	914.58	1443.37	1093.42		Ptma	767.48	1071.25	755.07	864.6
							Rpl23	1083.84	1398.52	739.56	1073.97		Atp1a1	1036.58	575.6	980.37	864.183
							mt-Nd3	968.4	985.5	1267.48	1073.79		Adh1	489.6	572	1516.92	859.507
							Rps23	997.09	1496.05	714.84	1069.33		Rpl18a	866.05	1173.65	517.67	852.457
							Rps5	1042.37	1471.11	681.18	1064.89		Hsp90b1	1111.31	865.74	535.14	837.397
							Atp5g3	928.81	1098.18	1149.5	1058.83		Zg16	1106.5	156.39	1120.97	794.62
							Ces2c	863.46	770.82	1539.67	1057.98		Rpl14	728.23	1077.91	539.28	781.807
							Txn1	968.19	1121.3	1074.34	1054.61		Hsp90ab1	722.12	988.18	573.32	761.207
							AY761184	290.44	1662.91	1171.58	1041.64		AY761184	71.08	1531.24	678.79	760.37
							Atp5o	879.63	1120.9	1117.69	1039.41
							Sis	1037.91	484.89	1555.87	1026.22
							Plac8	805.1	867.32	1382.98	1018.47
							Tpi1	771.81	1192.05	1061.28	1008.38
							Hsp90ab1	1076.34	1205.42	730.79	1004.18
							P4hb	939.98	883.64	1145.24	989.62
							Rpl36a	997.07	1278.2	631.65	968.973
							Rpl14	855.67	1325.11	684.61	955.13
							Slc25a5	822.2	981.34	1035.39	946.31
							Rbp2	262.96	547.74	2028.15	946.283
							Rpl18a	856.25	1323.97	593.03	924.417
							Rpl39	877.24	1271.29	582.96	910.497
							Itln1	788.53	1155.15	779.7	907.793
							Atp5a1	842.87	971.62	903.32	905.937
							Dak	968.38	512.18	1208.48	896.347
							Cox4i1	746.88	986.67	890.22	874.59
							Selenbp1	455.96	1160.67	891.92	836.183
							Zg16	1188.4	232.33	1082.05	834.26
							Rps21	771.34	1165.48	546.77	827.863
							Rpl38	794.55	1045.64	641.51	827.233
							AC170752.1	835.87	822	816.18	824.683
							Sod1	794.3	800.36	812.05	802.237
							Pigr	656.66	843.97	836.62	779.083
							Cox8a	666.42	897.22	757.16	773.6
							Cyp2c66	798.53	702.36	815.47	772.12
							Rps3	716.22	1075.56	501.7	764.493
							Atp1b1	943.64	573.89	763.16	760.23
							Npm1	629.56	985.76	623.05	746.123
							Fabp2	351.14	391.41	1489.01	743.853
							Tmsb4x	701.14	897.4	604.39	734.31
							Crip1	624.66	591.55	948.13	721.447
							Ces2a	545.75	751.04	832.58	709.79
							Dstn	708.6	768.2	642.11	706.303
							B2m	741.97	562.46	778.9	694.443
							Eef1g	602.84	969.22	505.13	692.397
							H2-K1	702.76	602.01	761.23	688.667
							Cox6a1	572.17	774.59	699.77	682.177
							Rpl22	634.64	917.97	481.03	677.88
							Ces2e	563.92	559.75	883.26	668.977
							Mif	453.42	997.12	547.38	665.973
							Uqcrh	614.52	689.09	675.83	659.813
							Ndrg1	746.68	557.45	667.36	657.163
							Cox6b1	533.92	734.32	692.6	653.613
							Lars2	799.61	472.11	683.63	651.783
							Pklr	640.88	365.69	927.89	644.82
							Tubb2c	867.06	532.93	525.65	641.88
							Ckmt1	590.28	565.72	732.35	629.45
							Gm14325	632.32	726.47	524.36	627.717
							Pfn1	621.37	655.99	593.4	623.587
							Rpl6	569.58	834.72	452.92	619.073
							Bsg	414.76	847.08	576.24	612.693
							Cbr1	609.4	604.25	588.62	600.757
							Aldh1b1	603.99	662.21	526.61	597.603
							Slc5a1	711.72	287.94	787.24	595.633
							Atpif1	470.75	690.95	621.59	594.43
							Epcam	547.95	713.11	506.16	589.073
							Scd2	443.51	650.25	649.04	580.933
							Rpl30	583.48	754.49	394.06	577.343
							Rps8	556.8	787.35	367.62	570.59
							Ubb	432.94	611.61	659.53	568.027
							Anxa4	788.01	556.79	359.24	568.013
							Rps28	563.6	782.07	353.65	566.44
							Rps19	531.14	815.78	334.08	560.333
							Reg3g	1132.36	168.26	370.86	557.16
							Akr1c13	477.41	480.42	713.42	557.083
							Aldh1a1	444.14	304.19	872.5	540.277
							Rpl37a	532.62	715.48	360.83	536.31
							Gm10263	512.03	711.87	355.87	526.59
							Atp5l	468.99	568.82	532.07	523.293
							Eif4a1	607.4	545.58	406.97	519.983
							Rpl37	492.49	668.98	359.87	507.113
							5730469M10Rik	501.58	205.96	790.81	499.45
							Hadh	463.76	441.74	589.68	498.393
							AI747448	380.68	356.85	746.3	494.61
							Prelid1	380.57	584.9	511.11	492.193
							Gstp2	434.91	472.5	558.63	488.68
							Eef1b2	459.57	666.56	336.14	487.423
							Spint2	473.17	567.53	396.38	479.027
							Cldn7	467.7	541.96	424.02	477.893
							Gm6180	413.79	522.34	494.77	476.967
							Ndufa4	415.8	511.9	498.22	475.307
							Tmbim6	384	442.96	598.26	475.073
							Mgst1	450	456.75	504.33	470.36
							Reg3a	331.15	182.51	893.41	469.023
							Prdx1	424.98	511.65	465.23	467.287
							Guca2b	599.34	149.43	647	465.257
							Ugt1a7c	395.26	427.94	567.64	463.613
							Atp5c1	414.81	504.57	471.11	463.497
							Cyp4f14	388.78	279.31	716.41	461.5
							Slc25a3	451.23	487.24	443.31	460.593
							Tuba1b	450.39	520.73	406.9	459.34
							Muc13	487.66	363.5	525.6	458.92
							Gsta4	671.29	279.08	424.83	458.4
							Pabpc1	344.52	650.19	374.52	456.41
							St3gal4	463.94	410.32	490.99	455.083
							Ubc	488.16	399.17	459.68	449.003
							Chchd2	377.07	458.79	507.86	447.907
							Khk	365.3	303.93	671.66	446.963
							Tm4sf5	361.3	394.68	584.88	446.953
							Anxa2	482.07	425.65	429.93	445.883
							Ifi27l2b	393.31	379.82	556.66	443.263

## Sheet: Highest expression - Starv
Sheet 2 of 4 - Analysis of most highly expressed genes associated with metabolism and innate immunity upon nutrient starvation
						CTR	Gm15284	132150	86377.8	87266.4	101931		STARV	Gm15284	100678	136353	97937.6	111657
							Defa24	104460	80132	77502.9	87365			Defa24	81602.8	115935	87681.9	95073.4
		CTR					mt-Co1	15498.6	14853.3	16760.9	15704.3			mt-Atp6	17717.3	17422.3	18396.5	17845.4
	Gene	Rank	Reads				mt-Atp6	16641.5	13975.1	14249.6	14955.4			mt-Co1	15518.8	15061.7	15924.6	15501.7
	Gm15284	1	101931	Defense			Rplp1	11685.7	12335.8	12681.3	12234.3			mt-Co2	11907.1	12454.1	13266.8	12542.6
	Defa24	2	87365	Defense			mt-Co2	12427.5	11498.1	12758.9	12228.2			mt-Atp8	11169.3	11691	11876.1	11578.8
	Eef1a1	10	9418.54	Translation			Rpl32	9476.99	9394.18	12119.1	10330.1			Rplp1	9724.42	11927.9	12889.9	11514.1
	Lyz1	12	6019.83	Defense			mt-Co3	11346	8501.02	10062.1	9969.72			mt-Co3	10286.5	9542.84	11161.4	10330.2
	Aldoa	24	2905.58	Metabolism			mt-Atp8	10870.7	8539.77	8972.66	9461.06			Rpl32	7623.55	10409.1	12443.7	10158.8
	Lgals4	25	2822.21	Metabolism			Eef1a1	8682.24	9023.9	10549.5	9418.54			Eef1a1	8201.92	9877.38	11136.9	9738.75
	Tpt1	28	2766.54	Metabolism			Rps6	6729.8	7135.21	9129.81	7664.94			Rps6	5627.61	7750.94	9154.99	7511.18
	Tff3	32	2673.86	Metabolism			Lyz1	5927.78	5744.39	6387.32	6019.83			Lyz1	5955.75	7407.92	7745.08	7036.25
	Aldob	33	2602.07	Metabolism			Gm7861	10160	4006.11	3823.6	5996.57			Gm10925	5911.26	6081.62	6085.16	6026.01
	Ptma	39	2210.82	Metabolism			Rpl3	4740.79	4526.45	5998.32	5088.52			Gm7861	5999.29	5376.53	3984.83	5120.22
	Lgals2	40	2205.15	Metabolism			Gm10925	5514.63	4705.6	4703.13	4974.45			AC110247.1	4832.76	6288.2	4133.33	5084.76
	Spink4	41	2195.14	Metabolism			Rpl7	4289.67	4171.6	5230.45	4563.91			Rpl3	3775.94	4906.11	6048.56	4910.2
	Itln1	42	2151.09	Metabolism			Rpl26	4296.18	3996.86	5259.22	4517.42			mt-Cytb	4994.58	4701.12	4332.06	4675.92
	Actg1	49	1897.02	Cytoskeleton			Rpl36	4151.39	4017.9	4615.63	4261.64			Rpl7	3573.88	4675.24	5336.72	4528.61
	Krt8	52	1832.28	Cytoskeleton			Gm10076	4310.22	3788.74	4271.51	4123.49			Rpl26	3375.95	4290.86	5387.17	4351.33
	Actb	58	1760.73	Cytoskeleton			mt-Nd1	5069.56	3872.48	2861.31	3934.45			mt-Nd1	4553.4	4153.11	3951.05	4219.19
							Rps26	3494.04	3227.32	3738.68	3486.68			Rpl36	3300.8	4137.59	4707.54	4048.64
							AC110247.1	3542.02	3406.27	3043.27	3330.52			Gm10076	3562.13	3193.16	4160.18	3638.49
							mt-Cytb	3651.6	2994.69	2867.3	3171.2			Rps26	2802.89	3821.32	3936.78	3520.33
		STARV					Aldoa	2794.81	2869.68	3052.24	2905.58			Mt1	3028.01	3434.78	2639.83	3034.21
	Gene	Rank	Reads				Lgals4	2965.87	2745.08	2755.67	2822.21			Tff3	2637.45	2522	3210.32	2789.92
	Gm15284	1	111657	Defense			Rps25	2742.55	2526.93	3067.64	2779.04			Tpt1	2295.58	2900.11	3099.4	2765.03
	Defa24	2	95073.4	Defense			Rps14	2612.93	2541.41	3181.51	2778.62			Actg1	2096.52	3100.67	3037.15	2744.78
	Eef1a1	10	9738.75	Translation			Tpt1	2656.99	2657.28	2985.35	2766.54			Rpl35a	2121.51	2777.04	3149.89	2682.81
	Lyz1	12	7036.25	Defense			Gm14851	4033.71	2198.01	2054.86	2762.19			mt-Nd4	3017.16	2738.17	2224.51	2659.95
	Mt1	24	3034.21	Metabolism			Rplp0	2536.79	2704.22	3018.71	2753.24			Rps25	2126.73	2704.74	3098.72	2643.4
	Tff3	25	2789.92	Metabolism			Rpl35a	2674.8	2375.79	2994.21	2681.6			Rplp0	2113.57	2753.87	3041.55	2636.33
	Tpt1	26	2765.03	Metabolism			Tff3	2988.37	2076.88	2956.33	2673.86			Lgals4	2928.03	2423.45	2532.88	2628.12
	Actg1	27	2744.78	Cytoskeleton			Aldob	4023.29	2757.69	1025.24	2602.07			Rps14	2089.7	2581.95	3080.06	2583.9
	Lgals4	32	2628.12	Metabolism			Rpl13a	2389.54	2440.21	2824.69	2551.48			Gm14851	2778.24	2896.31	1940.44	2538.33
	Itln1	36	2437.59	Metabolism			Rps17	2445.65	2342.15	2817.95	2535.25			Rpl13a	2011.24	2542.1	2901.98	2485.11
	Aldoa	38	2340.46	Metabolism			Rps11	2423.37	2250.47	2561.56	2411.8			Itln1	2037.45	2858.8	2416.52	2437.59
	Spink4	39	2301.89	Metabolism			Rps4x	2128.29	2061.63	2526.82	2238.91			Rps17	1912.49	2476.95	2917.44	2435.63
	Mt2	43	2172.23	Metabolism			Rps29	2060.81	2171.29	2407.09	2213.06			Aldoa	2218.31	2269.4	2533.68	2340.46
	Actb	48	1984.83	Cytoskeleton			Ptma	2432.15	2184.38	2015.94	2210.82			Spink4	1971.1	2328.08	2606.48	2301.89
	Eef2	56	1712.43	Translation			Lgals2	2246.37	2111.38	2257.7	2205.15			Rpl10a	1890.74	2309.92	2667.32	2289.33
	Gnb2l1	60	1613.79	Signalling			Spink4	2336.5	1850.39	2398.53	2195.14			Rps4x	1756.72	2361.74	2662.41	2260.29
							Itln1	2178.87	2136.03	2138.37	2151.09			Rps11	1905	2140.18	2665.32	2236.83
							Rpl10a	2046.66	2001.01	2366.72	2138.13			Mt2	2100.15	2595.41	1821.14	2172.23
							Rpl4	1870.16	2014.81	2460.5	2115.16			Rpl4	1631.25	2243.13	2508.52	2127.63
							Rps15	1890.4	2020.71	2397.24	2102.78			Rps29	1713.39	2183.17	2481.53	2126.03
							Rpl5	1847.88	1833.16	2450.33	2043.79			mt-Nd2	2411.55	2016.03	1812.39	2079.99
							Rpl13	1740.75	1802.51	2208.94	1917.4			Rpl5	1538.89	2089.2	2545.72	2057.94
							Rps24	1856.47	1694.38	2172.93	1907.93			Actb	1889.11	2008.06	2057.31	1984.83
							Actg1	1844.26	1827.9	2018.89	1897.02			Rps15	1612.42	1972.54	2341.78	1975.58
							Rps9	1700.84	1849	2074.9	1874.91			Rps9	1567.77	2013.73	2206.82	1929.44
							Rpl8	1713.54	1791.95	2038.99	1848.16			Rpl13	1418.48	1920.1	2228.75	1855.78
							Krt8	1841.01	1810.24	1845.59	1832.28			Rps24	1453.05	1847.85	2216.3	1839.07
							Rps2	1938.1	1769.45	1769.85	1825.8			Rpl8	1451.97	1795.51	2029.17	1758.88
							mt-Nd4	2177.22	1789.12	1509.75	1825.36			Rpl28	1389.7	1771.02	2068.42	1743.05
							Rps10	1652.43	1678.77	2017.75	1782.98			mt-Nd5	1878.34	1698.65	1614.99	1730.66
							Rps16	1663.1	1707.07	1936.84	1769			Eef2	1555.77	1720.8	1860.72	1712.43
							Rpl28	1624.29	1702.51	1970.58	1765.79			Rps16	1380.15	1715.6	2005.86	1700.54
							Actb	2038.41	1627.23	1616.55	1760.73			Rps10	1336.12	1664.47	2027.96	1676.18
							Sprr2a3	1877.54	1674.5	1715.66	1755.9			Rps2	1431.44	1687.56	1779.93	1632.98
							Ldha	1938.85	1688.63	1495.63	1707.7			Gnb2l1	1249.53	1653.57	1938.27	1613.79
							Gpi1	1694.06	1680.22	1624.34	1666.21			mt-Nd6	1713.22	1644.24	1430.74	1596.07
							mt-Nd2	2162.35	1546.86	1247.39	1652.2			Rpl19	1321.75	1616.76	1789.47	1575.99
							Rpl19	1554.02	1581.74	1793.93	1643.23			Ptma	1519.36	1558.97	1611.64	1563.32
							Gnb2l1	1472.71	1550.21	1888.02	1636.98			Rps5	1204.01	1592.44	1822.43	1539.63
							Mt1	1808.79	2033.97	1059.66	1634.14			Krt8	1421.87	1421.39	1578.06	1473.77
							Gstp1	1433.03	1500.9	1911.11	1615.01			Aldob	3236.74	747.98	433.11	1472.61
							Eef2	1296.3	1661.15	1714.99	1557.48			Gpi1	1673.93	1304.24	1408.24	1462.14
							Rps5	1400.16	1476.33	1700.9	1525.8			Rpl23	1134.82	1467.4	1768.85	1457.02
							Ftl1	1442.75	1489.37	1453.22	1461.78			Lgals2	1284.42	1345.28	1595.01	1408.24
							Rpl23	1395.3	1317.34	1640.08	1450.91			Hspa8	1250.08	1321.03	1643.59	1404.9
														mt-Nd3	1490.66	1317.04	1343.07	1383.59
														Sprr2a3	1303.05	1268.99	1516.35	1362.8
														Rps23	1024.11	1399.7	1623.54	1349.12
														Ldha	1428.71	1218.53	1392.44	1346.56
														Ftl1	1241.05	1455.42	1248.82	1315.1
														Rpl39	935.18	1335.68	1511.67	1260.84
														Rpl36a	977.04	1275.1	1512.99	1255.04
														Rpl18a	976.22	1238.26	1523.97	1246.15
														Hsp90ab1	1022.65	1295.25	1380.68	1232.86
														Atp5b	1341.74	1176.96	1172.38	1230.36
														Rpl14	980.53	1240.23	1415.16	1211.97
														Pgk1	1047.17	1102.76	1262.59	1137.51
														Npm1	894.85	1178.11	1286.08	1119.68
														Rps21	907.9	1133.85	1308.55	1116.77
														Fth1	1406.26	1005.58	925.22	1112.35
														Pkm2	1098.34	1084.19	1104.89	1095.81
														Rpl38	912.2	1065.58	1271.81	1083.2
														Gstp1	969.81	1052.81	1208.31	1076.98
														Cyp2c68	1150.96	1168.36	792.02	1037.11
														Tmsb4x	953.43	1050.01	1086.06	1029.83
														Oat	1335.71	737.89	1010.74	1028.11
														Dstn	833.02	1097.98	993.67	974.89
														Rps3	753.22	1009.76	1138.26	967.08
														AC170752.1	959.61	890.58	1047.24	965.81
														Sis	1682.68	604.82	541.55	943.017
														Rpl22	730.33	954.08	1118.84	934.417
														Txn1	1058.21	858.9	862.76	926.623
														Guca2a	1126.47	670.45	904.37	900.43
														Krt19	899.57	810.48	952.88	887.643
														Atp1a1	1209.24	747.05	697.6	884.63

## Sheet: Repressed genes <0.4 fold
Sheet 3 of 4 - List of genes found to be downregulated more than 2.5 fold in murine enteroids upon either thapsigargin or nutrient starvation
	GER: Gene expression regulation
	SEC: Secreted factors
	CytS: Cytoskeleton and structure
	M: Metabolism
	CT: Channels and Transporters
	RPME: Receptors, Plama membrane and ECM proteins
	CS: Cellular signaling
	Stress: Stress
	Misc: Miscellenous
	Main Functional group	Sub-Category	Control #1				THAPSIGARGIN				THAPSI/CTR		Control #2				STARVATION				STARV/CTR
			Sample A	Sample B	Sample C	Average	Sample A	Sample B	Sample C	Average			Sample A	Sample B	Sample C	Average	Sample A	Sample B	Sample C	Average
Arhgef40	CS	GTPase activity regulation	0.92	0.7	0.36	0.66	0.4	0.32	0.18	0.3	0.454545		1.25	2.04	3.28	2.19	0.44	0.84	1.09	0.79	0.360731
Arrb1	CS		24.94	28.41	28.64	27.33	9.56	9.81	11.77	10.38	0.379802		20.3	23.9	28.42	24.2067	16.06	15.82	18.38	16.7533	0.692096
Asb16	CS		0.68	1.42	0.83	0.976667	0.47	1.2	0.38	0.683333	0.699659		0.49	0.51	0.51	0.503333	0.12	0.13	0.28	0.176667	0.350993
Bloc1s1	CS	Trafficking	38.91	40.04	45.5	41.4833	13.71	10.85	21.92	15.4933	0.373483		44.98	42.38	39.72	42.36	40.53	35.09	33.94	36.52	0.862134
Bub1b	CS	cell cycle	12.56	29.4	17.54	19.8333	4.18	10.77	6.05	7	0.352941		28.22	29.78	29.35	29.1167	19.59	20.65	23.03	21.09	0.724327
Camkk2	CS		1.67	1.65	1.31	1.54333	0.55	0.7	0.53	0.593333	0.384449		1.01	1.32	1.06	1.13	0.58	0.64	0.46	0.56	0.495575
Card11	CS	Immunity	2.8	9.6	4.31	5.57	0.66	5.43	0.92	2.33667	0.419509		5.26	5.19	7.28	5.91	1.78	1.67	2.14	1.86333	0.315285
Ccnb1	CS	cell cycle	18.93	45.49	27.37	30.5967	7.86	13.62	10.78	10.7533	0.351454		49.42	40.97	42.17	44.1867	31.09	32.71	36.04	33.28	0.753168
Ccnd1	CS	cell cycle	43.35	50.52	28.64	40.8367	13.25	14.14	8.84	12.0767	0.295731		64.26	74.18	75.31	71.25	42.52	44.77	64.33	50.54	0.709333
Ccne1	CS	cell cycle	6.51	8.52	6.58	7.20333	2.89	1.99	1.36	2.08	0.288755		10.3	8.99	5.64	8.31	5.05	2.62	3.7	3.79	0.456077
Ccnf	CS	cell cycle	7.12	14.96	8.62	10.2333	1.73	1.78	1.67	1.72667	0.16873		14.65	15.12	14.72	14.83	9.99	10.28	10.96	10.41	0.701955
Cdk1	CS	cell cycle	17.27	41.19	24.2	27.5533	6.69	13.74	9.04	9.82333	0.356521		43.12	35.4	38.99	39.17	25.48	27.19	31.75	28.14	0.718407
Cdkn2a	CS	cell cycle	0.02	0	0.02	0.0133333	0.03	0.06	0.03	0.04	3		0.05	0.24	0.33	0.206667	0.05	0.05	0.11	0.07	0.33871
Cdkn2c	CS	cell cycle	4.01	10.07	6.12	6.73333	1.29	2.46	1.99	1.91333	0.284158		11.65	11.15	11.66	11.4867	8.64	8.71	8.31	8.55333	0.744631
Cenpf	CS	cell cycle	2.94	6.24	4.25	4.47667	0.97	1.65	1.36	1.32667	0.296351		5.35	7.44	8.92	7.23667	5.96	7.53	7.41	6.96667	0.96269
Cenpi	CS	cell cycle	2.17	5.61	3.64	3.80667	0.87	2.17	1.42	1.48667	0.390543		6.67	5.6	5.99	6.08667	4.92	5.13	6.64	5.56333	0.91402
Cnih3	CS	Trafficking	0.03	0.07	0.47	0.19	0.02	0.01	0.07	0.0333333	0.175439		0	0	0	0	0	0	0	0	#DIV/0!
Ddit4l	CS		1.02	0.5	0.58	0.7	0.12	0.2	0.46	0.26	0.371429		0.18	0.23	0.26	0.223333	0.03	0.11	0.16	0.1	0.447761
Dmbt1	CS		161.63	664.75	362.4	396.26	29.49	112.32	65.02	68.9433	0.173985		77.01	87.53	109.08	91.2067	60.17	48.91	59.04	56.04	0.614429
Dpysl2	CS		2.58	3.44	4.65	3.55667	1.37	0.85	1.64	1.28667	0.361762		6.63	5.15	5.23	5.67	2.67	2.26	3.44	2.79	0.492063
Dusp9	CS	phosphatase	1.23	1.34	0.76	1.11	0.52	0.57	0.21	0.433333	0.39039		0.97	0.87	0.87	0.903333	0.45	0.83	1.11	0.796667	0.881919
Espl1	CS	cell cycle	2.9	6.56	4.59	4.68333	0.9	2.35	1.51	1.58667	0.33879		5.44	8.01	7.25	6.9	5.49	5.36	5.15	5.33333	0.772947
Fam176a	CS	apoptosis	0.26	0.21	0.24	0.236667	0.03	0.13	0.02	0.06	0.253521		0.23	0.04	0.15	0.14	0.01	0	0.06	0.0233333	0.166667
Fam64a	CS	cell cycle	1.22	8.75	3.06	4.34333	0.16	1.25	0.45	0.62	0.142748		10.52	8.22	10.59	9.77667	2.72	2.97	4.16	3.28333	0.335834
Fbxo15	CS		0.01	0.22	0.11	0.113333	0.06	0.71	0.47	0.413333	3.64706		0.1	0.15	0.17	0.14	0	0.07	0.09	0.0533333	0.380952
Gimap8	CS	apoptosis	0.41	0.24	0.51	0.386667	0.17	0.06	0.17	0.133333	0.344828		0.19	0.18	0.14	0.17	0.09	0.07	0.06	0.0733333	0.431373
Gm5160	CS		0	0.12	0.16	0.0933333	0	0.19	0.05	0.08	0.857143		0.36	0.11	0	0.156667	0	0	0.13	0.0433333	0.276596
Gtse1	CS	cell cycle	16.8	14.09	9.45	13.4467	2.78	4.7	4.01	3.83	0.284829		13.58	14.38	14.97	14.31	8.92	8.34	9.28	8.84667	0.618216
Ifitm2	CS	Immunity	347.55	633.88	334.78	438.737	143.72	224.26	114.73	160.903	0.366742		626.22	593.17	698.58	639.323	354.24	406.12	486.97	415.777	0.650339
Ifitm6	CS	Immunity	0.54	0.23	0.27	0.346667	0.35	0.3	0.24	0.296667	0.855769		1.71	0.57	0.53	0.936667	0.53	0.19	0.1	0.273333	0.291815
Itpripl1	CS		12.79	11.72	8.52	11.01	3.26	4.28	3.49	3.67667	0.333939		10.07	10.6	10.34	10.3367	8.51	8.79	11.36	9.55333	0.924218
Khdc1a	CS	apoptosis	0.11	0.61	0.28	0.333333	0	0.12	0.24	0.12	0.36		0.48	1.02	3.36	1.62	0.49	0.56	2.02	1.02333	0.631687
Kif20a	CS	cell cycle	9.07	24.64	15.92	16.5433	2.93	7.39	5.3	5.20667	0.314729		26.56	27.58	24.32	26.1533	20.7	19.53	21.28	20.5033	0.783966
Kif2c	CS	cell cycle	5.73	15.84	9.65	10.4067	2.5	5.69	3.9	4.03	0.387252		17.25	16.99	17.69	17.31	15.56	15.56	15.09	15.4033	0.889852
Kpna7	CS		0.06	0.8	0.6	0.486667	0.05	0.58	0.53	0.386667	0.794521		0.05	0.07	0.29	0.136667	0.01	0.03	0.11	0.05	0.365854
Lmtk3	CS		0.06	0.11	0.12	0.0966667	0.07	0.08	0.1	0.0833333	0.862069		0.06	0.1	0.19	0.116667	0.02	0.02	0.09	0.0433333	0.371429
Mst1	CS		0.01	0.08	0.05	0.0466667	0.04	0.02	0.01	0.0233333	0.5		0.12	0.05	0.14	0.103333	0.01	0.05	0.06	0.04	0.387097
Mx2	CS	Immunity	0.22	0.16	0.25	0.21	0.6	0.64	0.51	0.583333	2.77778		0.19	0.16	0.31	0.22	0.06	0.06	0.12	0.08	0.363636
Nlrp10	CS	Immunity	0.02	0.09	0.01	0.04	0.01	0.05	0.05	0.0366667	0.916667		0.08	0.04	0.31	0.143333	0.05	0.03	0.04	0.04	0.27907
Nlrp1b	CS	Immunity	2.15	1.82	2.96	2.31	2.61	2.77	4.54	3.30667	1.43146		2.2	2.3	2.26	2.25333	1.27	0.54	0.78	0.863333	0.383136
Nos3	CS	Immunity	0.08	0.14	0.06	0.0933333	0.06	0.08	0.05	0.0633333	0.678571		0.09	0.11	0.16	0.12	0.01	0.02	0.04	0.0233333	0.194444
Nrarp	CS		28.45	15.49	12.41	18.7833	8.45	5.71	4.8	6.32	0.336469		17.81	18.83	20.42	19.02	9.45	12.53	20.21	14.0633	0.739397
Olfm4	CS		64.28	408.9	175.32	216.167	10.16	130.63	63.43	68.0733	0.314911		389.1	662.12	432.95	494.723	280.32	822.18	469.03	523.843	1.05886
Pate4	CS		0.13	0.24	2.15	0.84	0.11	0.06	0.55	0.24	0.285714		0.02	0.04	0.05	0.0366667	0.02	0.02	0	0.0133333	0.363636
Pde6g	CS		0.15	0.1	0.12	0.123333	0.47	1.21	0.65	0.776667	6.2973		0.16	0.15	0.31	0.206667	0	0.03	0.09	0.04	0.193548
Phlda3	CS		28.94	13.34	8.12	16.8	9.4	4.64	3.33	5.79	0.344643		13.1	11.39	18.37	14.2867	6.68	5.03	11.86	7.85667	0.54993
Plk1	CS	cell cycle	17.06	39.98	27.49	28.1767	6.27	12.13	10.26	9.55333	0.339051		42.94	44.37	36.14	41.15	33.6	31.09	30.39	31.6933	0.77019
Prkar2b	CS		0.24	0.42	0.22	0.293333	0.08	0.14	0.09	0.103333	0.352273		0.77	0.5	1.67	0.98	0.63	0.9	1.38	0.97	0.989796
Psca	CS		0.85	0.51	0.87	0.743333	0.66	0.26	0.65	0.523333	0.704036		0.46	0.48	0.32	0.42	0.21	0.06	0.18	0.15	0.357143
Psrc1	CS	cell cycle	14.7	13.63	5.94	11.4233	3.45	4.84	2.55	3.61333	0.316312		11.66	12.25	24.53	16.1467	8.32	8.14	14.44	10.3	0.637903
Ptk6	CS		1.78	1.03	1.99	1.6	0.61	0.26	0.82	0.563333	0.352083		1.57	1.82	1.86	1.75	0.35	0.16	0.31	0.273333	0.15619
Pxmp2	CS		1.78	4.51	4.24	3.51	0.59	1.44	0.95	0.993333	0.283001		5.17	3.76	4.38	4.43667	1.97	1.2	1.47	1.54667	0.34861
Rab11fip5	CS	Trafficking	0.24	0.08	0.43	0.25	0.13	0.04	0.1	0.09	0.36		0.06	0.06	0.03	0.05	0.11	0.03	0.05	0.0633333	1.26667
Rab19	CS	Trafficking	4.61	5.51	4.74	4.95333	2.25	1.84	1.22	1.77	0.357335		5.71	5.36	4.59	5.22	3.14	3.52	3.68	3.44667	0.660281
Rab33a	CS	Trafficking	0.15	0.1	0.04	0.0966667	0.06	0.13	0.15	0.113333	1.17241		0.11	0.12	0.09	0.106667	0.04	0.04	0.02	0.0333333	0.3125
Rasd2	CS	GTPase activity regulation	1.02	1.39	0.96	1.12333	0.5	0.46	0.34	0.433333	0.385757		2.41	2.3	4.02	2.91	1.66	1.93	2.17	1.92	0.659794
Rassf5	CS		0.5	4.14	2.75	2.46333	0.26	1.83	0.71	0.933333	0.37889		1.4	1.22	1.04	1.22	0.92	1.12	0.81	0.95	0.778689
Rbp2	CS		262.96	547.74	2028.15	946.283	157.17	126.08	560.44	281.23	0.297194		95.27	113.96	38.91	82.7133	113.68	46.79	26.58	62.35	0.753808
Relt	CS		0.56	0.49	0.52	0.523333	0.29	0.68	0.37	0.446667	0.853503		0.55	0.49	0.44	0.493333	0.08	0.08	0.1	0.0866667	0.175676
Rep15	CS	Trafficking	11.37	4.86	7.04	7.75667	2.15	0.85	0.99	1.33	0.171465		10.99	4.96	4.71	6.88667	11.23	2.81	6.26	6.76667	0.982575
Rgs14	CS	GTPase activity regulation	0.34	0.13	0.19	0.22	0.11	0.06	0.09	0.0866667	0.393939		0.29	0.36	0.54	0.396667	0.25	0.36	0.34	0.316667	0.798319
Rnf157	CS		3.92	7.34	2.97	4.74333	2.3	4.76	2.88	3.31333	0.698524		6.7	8.69	11.16	8.85	2.25	3	2.51	2.58667	0.292279
Serpine1	CS		0.52	4.39	3.89	2.93333	1.4	14.49	16.21	10.7	3.64773		0.47	1.46	3.67	1.86667	0.1	0.44	1.21	0.583333	0.3125
Sh3bp1	CS		1.86	2.5	2.17	2.17667	1.57	1.04	1.18	1.26333	0.580398		0.86	0.96	1.16	0.993333	0.31	0.13	0.13	0.19	0.191275
Snn	CS		0.58	1.19	1.4	1.05667	0.22	0.17	0.2	0.196667	0.18612		2.36	2.22	1.87	2.15	1.02	1.47	1.3	1.26333	0.587597
Tigd3	CS	cell cycle	1.97	1.78	3.18	2.31	1.29	0.69	1.74	1.24	0.536797		1.06	0.68	0.73	0.823333	0.28	0.35	0.25	0.293333	0.356275
Tnfaip8l1	CS		3.94	8.88	5.82	6.21333	1.91	2.71	2.02	2.21333	0.356223		14.71	14.53	14.21	14.4833	11.12	11.91	14.29	12.44	0.858918
Trappc1	CS	Trafficking	37.62	49.7	44.64	43.9867	15.63	10.48	12.41	12.84	0.291907		63.8	46.36	49.58	53.2467	36.35	28.8	29.97	31.7067	0.595468
Uhrf1	CS		25.62	41.58	26.75	31.3167	6.54	17.66	8.54	10.9133	0.348483		42.84	46.66	46.01	45.17	24.12	24.12	30.33	26.19	0.57981
X99384	CS	phosphatase	0.24	0.53	0.35	0.373333	0.1	0.26	0.11	0.156667	0.419643		0.18	0.26	0.22	0.22	0.02	0.08	0.09	0.0633333	0.287879
Aqp3	CT		2.47	0.74	10.28	4.49667	1.98	0.56	5.35	2.63	0.584878		0.58	0.3	0.08	0.32	0.15	0.01	0.01	0.0566667	0.177083
Clcn1	CT		0.34	0.54	0.28	0.386667	0.07	0.2	0.11	0.126667	0.327586		0.27	0.29	0.4	0.32	0.13	0.09	0.16	0.126667	0.395833
Efcab4b	CT		8.67	4.28	5.19	6.04667	2.46	2.62	1.98	2.35333	0.389195		4.68	8.75	10.58	8.00333	10.64	12.53	11.65	11.6067	1.45023
Kcnf1	CT		1.09	5.04	2.15	2.76	0.19	2.32	0.6	1.03667	0.375604		2	2.49	4.39	2.96	1.75	4.08	4.37	3.4	1.14865
Kcnn4	CT		22.92	41.33	25.53	29.9267	4.74	13.12	6.19	8.01667	0.267877		39.98	36.37	34.92	37.09	23.23	22.43	30.66	25.44	0.685899
Lrrc26	CT		18.95	21.62	15.39	18.6533	6.28	5.67	5.87	5.94	0.318442		39.72	29.18	30.59	33.1633	34.74	23.42	33.54	30.5667	0.921701
Mfsd2a	CT		14.04	16.1	26.9	19.0133	24.85	15.23	24.32	21.4667	1.12903		10.27	10.4	7.45	9.37333	2.67	2.12	3.36	2.71667	0.289829
Scn2b	CT		0.63	3.06	1.57	1.75333	0.12	0.69	0.27	0.36	0.205323		4.57	6.02	7.91	6.16667	1.89	3.13	5.25	3.42333	0.555135
Slc1a3	CT		0.35	1.59	0.78	0.906667	0.09	0.48	0.25	0.273333	0.301471		0.1	0.07	0.05	0.0733333	0.21	0.2	0.07	0.16	2.18182
Slc25a29	CT		0.67	0.54	0.37	0.526667	0.71	0.66	0.38	0.583333	1.10759		1.29	1.27	1.09	1.21667	0.35	0.41	0.42	0.393333	0.323288
Slc25a35	CT		6.11	4.24	4.28	4.87667	1.42	1.59	1.13	1.38	0.28298		9.6	8.74	12.16	10.1667	6.62	6.64	9.07	7.44333	0.732131
Slc25a45	CT		4.15	7.14	28.26	13.1833	3.04	4.4	21.64	9.69333	0.735272		2.69	1.53	0.91	1.71	0.85	0.2	0.17	0.406667	0.237817
Slc27a6	CT		0.31	2.24	1.47	1.34	0.13	0.63	0.57	0.443333	0.330846		0.21	0.47	0.41	0.363333	0.13	0.34	0.17	0.213333	0.587156
Slc39a10	CT		2.01	3.64	2.08	2.57667	0.58	0.7	0.52	0.6	0.232859		4.25	3.72	4.91	4.29333	1.65	1.55	2.36	1.85333	0.431677
Slc45a3	CT		0.05	0.05	0.03	0.0433333	0.08	0.09	0.04	0.07	1.61538		0.16	0.39	0.59	0.38	0.05	0.1	0.17	0.106667	0.280702
Trpc7	CT		0.36	0.33	0.32	0.336667	0.14	0.13	0.08	0.116667	0.346535		0.15	0.11	0.14	0.133333	0.22	0.16	0.16	0.18	1.35
Fhod1	CytS		6.81	5.46	4.95	5.74	2.57	1.81	1.82	2.06667	0.360046		6.69	8.84	8.31	7.94667	5.19	6.47	6.07	5.91	0.743708
Kif24	CytS		1.92	3.96	2.85	2.91	1.03	3.74	1.39	2.05333	0.705613		2.88	4.13	5.17	4.06	1.19	1.47	1.26	1.30667	0.321839
Lmnb1	CytS		33.92	63.43	42.39	46.58	14.3	26.31	15.25	18.62	0.399742		71.85	70.66	62.36	68.29	42.67	43.36	53.38	46.47	0.68048
Morn4	CytS		0.12	0.07	0.08	0.09	0.19	0.1	0.05	0.113333	1.25926		0.2	0.1	0.12	0.14	0.05	0.05	0.06	0.0533333	0.380952
Myh7b	CytS		0.51	0.67	0.48	0.553333	0.32	0.48	0.36	0.386667	0.698795		0.26	0.25	0.58	0.363333	0.19	0.08	0.12	0.13	0.357798
Nav1	CytS		2.17	1.97	2.2	2.11333	0.53	1.29	0.51	0.776667	0.367508		2.44	4.81	3.47	3.57333	2.4	5.61	3.01	3.67333	1.02799
Nrap	CytS		0.11	0.37	0.18	0.22	0.1	0.27	0.16	0.176667	0.80303		0.46	0.38	0.68	0.506667	0.18	0.13	0.19	0.166667	0.328947
Reep1	CytS		1.11	1.34	0.82	1.09	0.35	0.54	0.27	0.386667	0.35474		1.43	1.61	1.61	1.55	0.71	0.69	1.03	0.81	0.522581
Stmn1	CytS		109.07	261.69	131.87	167.543	34.77	82.46	42.95	53.3933	0.318684		342.88	282.14	282.11	302.377	229.1	263.73	297.13	263.32	0.870834
Tmsb15b1	CytS		6.83	5.64	5.36	5.94333	1.66	0.71	0.58	0.983333	0.165451		10.13	4.66	8.29	7.69333	8.28	9.15	8.61	8.68	1.12825
Tmsb15b2	CytS		0.96	0.4	0.92	0.76	0.2	0	0	0.0666667	0.0877193		0.42	1.15	0.93	0.833333	0	0	0.44	0.146667	0.176
Tmsb15l	CytS		2.22	3.38	2.19	2.59667	0.9	0.81	0.5	0.736667	0.283697		3.21	3.16	1.96	2.77667	2.31	2.56	2.64	2.50333	0.901561
Tuba1b	CytS		450.39	520.73	406.9	459.34	171.01	167.04	120.27	152.773	0.332593		618.44	517.57	503.64	546.55	263.86	242.76	322.06	276.227	0.505401
Apobec2	GER		0.08	0.49	0.31	0.293333	0.5	0.76	0.81	0.69	2.35227		0.78	1.06	1.02	0.953333	0.14	0.18	0.21	0.176667	0.185315
Batf2	GER	TF	0.65	0.95	0.67	0.756667	0.46	0.43	0.45	0.446667	0.590308		1.28	2.11	1.51	1.63333	0.53	0.44	0.53	0.5	0.306122
Celf5	GER		0.42	0.65	1.03	0.7	0.25	0.17	0.2	0.206667	0.295238		0.55	0.62	1.02	0.73	0.31	0.26	0.2	0.256667	0.351598
Cited4	GER		0.99	1.55	1.57	1.37	0.22	0.76	0.52	0.5	0.364964		3.2	2.78	1.94	2.64	1.95	2.8	2.83	2.52667	0.957071
Dhx58	GER		2.83	2.27	2.99	2.69667	3.85	1.34	2.54	2.57667	0.955501		2.15	1.63	2.49	2.09	0.92	0.61	0.66	0.73	0.349282
Eme1	GER		2.41	4.82	3.82	3.68333	0.99	1.87	1.34	1.4	0.38009		4.68	4.91	4.54	4.71	2.75	2.48	3.15	2.79333	0.593064
Glod5	GER		68.24	63.22	67.59	66.35	26.93	12.38	16.29	18.5333	0.279327		63.67	41.64	46.06	50.4567	41.36	21.95	24.95	29.42	0.583075
Gm10073	GER		0	1.2	0.28	0.493333	0	0.33	0.54	0.29	0.587838		1.26	0.58	0.7	0.846667	0.64	0	0	0.213333	0.251969
Hes5	GER	TF	0.52	0.58	0.46	0.52	0.07	0.12	0.02	0.07	0.134615		0.65	0.91	0.87	0.81	0.16	0.65	0.77	0.526667	0.650206
Hist1h2ag	GER		0.17	0.9	0.99	0.686667	0	0.2	0.32	0.173333	0.252427		1.88	0.35	0.42	0.883333	1.54	0	1.6	1.04667	1.18491
Hist1h2ah	GER		0.15	0.72	0.22	0.363333	0	0.09	0.21	0.1	0.275229		0.17	0.15	0.19	0.17	0	0.17	0.18	0.116667	0.686275
Hist1h2bm	GER		0	0.08	0.3	0.126667	0.08	0.27	0.22	0.19	1.5		0.34	0.47	0.19	0.333333	0.18	0.17	0	0.116667	0.35
Hist1h4c	GER		0.38	0.69	0.09	0.386667	0	0.33	0	0.11	0.284483		0.21	0.38	0	0.196667	0.64	2.09	0.44	1.05667	5.37288
Hmx2	GER	TF	1.46	0.86	2.2	1.50667	0.54	0.14	0.7	0.46	0.30531		0.48	0.44	0.55	0.49	0.58	0.36	0.31	0.416667	0.85034
Mesp2	GER	TF	0.42	1.29	0.6	0.77	0.22	1.26	0.48	0.653333	0.848485		0.33	0.3	0.42	0.35	0.12	0.05	0.24	0.136667	0.390476
Mex3a	GER		1.48	3.14	1.74	2.12	0.59	0.88	0.36	0.61	0.287736		2.92	4.5	4.6	4.00667	3.11	5.41	4.58	4.36667	1.08985
Mrpl41	GER		43.39	51.67	42.13	45.73	23.57	24.48	20.28	22.7767	0.498068		59.07	47.88	42.1	49.6833	18.44	17.61	17.44	17.83	0.358873
Msi1	GER		2.23	3.95	3.82	3.33333	0.6	1.42	0.97	0.996667	0.299		4.32	5.92	3.68	4.64	2.18	3.37	2.72	2.75667	0.594109
Mxd3	GER		1.84	4.34	2.34	2.84	0.72	0.97	0.7	0.796667	0.280516		5.72	6.53	4.64	5.63	3.37	3.77	4.86	4	0.71048
Myb	GER	TF	12.24	26.91	15.41	18.1867	1.94	5.17	1.8	2.97	0.163306		29.1	33.26	26.68	29.68	19.84	25.64	30.61	25.3633	0.85456
Mycn	GER	TF	3.18	3.93	2.47	3.19333	0.89	0.31	0.28	0.493333	0.154489		2.64	2.88	2.4	2.64	1.43	1.6	2.63	1.88667	0.714646
Nfe2	GER	TF	0.29	0.36	0.66	0.436667	0.51	0.26	0.23	0.333333	0.763359		0.28	0.31	0.17	0.253333	0.09	0.09	0.11	0.0966667	0.381579
Nr0b2	GER		0.11	1.02	1.18	0.77	0	0.18	0.63	0.27	0.350649		0.06	0.02	0	0.0266667	0	0.02	0.02	0.0133333	0.5
Olig1	GER		0.05	0.19	0.11	0.116667	0.01	0.13	0.05	0.0633333	0.542857		0.26	0.2	0.18	0.213333	0.06	0.08	0.08	0.0733333	0.34375
Pif1	GER		2.22	4.9	2.86	3.32667	0.69	1.08	1.05	0.94	0.282565		4.87	5.69	5.39	5.31667	4.34	4.6	4.12	4.35333	0.818809
Piwil4	GER		0.11	0.6	0.2	0.303333	0.01	0.21	0.03	0.0833333	0.274725		0.51	0.5	1.02	0.676667	0.53	0.48	0.83	0.613333	0.906404
Rad54l	GER		4.52	10.57	6.91	7.33333	1.15	3.32	2.08	2.18333	0.297727		10.12	9.94	9.74	9.93333	6.46	5.96	6.08	6.16667	0.620805
Ripply3	GER		0.19	0.41	0.17	0.256667	0.07	0.18	0.06	0.103333	0.402597		0.37	0.29	0.41	0.356667	0.15	0.08	0.18	0.136667	0.383178
Rpusd3	GER		8.23	9.28	7.69	8.4	10.02	11.23	8.95	10.0667	1.19841		8.94	7.92	8.81	8.55667	3.63	2.86	2.4	2.96333	0.346319
Snai3	GER		1.19	1.51	0.91	1.20333	0.57	1	0.45	0.673333	0.559557		1.09	1.06	1.06	1.07	0.34	0.35	0.5	0.396667	0.370717
Trex2	GER		0.48	0.33	0.04	0.283333	0.07	0.06	0.06	0.0633333	0.223529		0.43	0.38	0.73	0.513333	0.25	0.41	0.43	0.363333	0.707792
A4galt	M		0.91	0.86	1.65	1.14	0.35	0.14	0.39	0.293333	0.25731		0.5	0.25	0.22	0.323333	0.36	0.24	0.26	0.286667	0.886598
A4gnt	M		1.1	1.34	0.76	1.06667	0.06	0.21	0	0.09	0.084375		2.58	2.09	3.96	2.87667	3.27	4.01	4.99	4.09	1.42178
Abp1	M		135.25	170.79	250.71	185.583	59.46	31.83	58.06	49.7833	0.268253		142	129.74	108.69	126.81	150.12	65.74	69.89	95.25	0.751124
Acacb	M		0.41	0.32	0.53	0.42	0.15	0.13	0.19	0.156667	0.373016		0.07	0.1	0.15	0.106667	0.08	0.05	0.05	0.06	0.5625
Acat2	M		122.54	162.56	109.29	131.463	62.83	54.38	31.55	49.5867	0.37719		201.53	174.87	170.48	182.293	86.88	63.88	68.43	73.0633	0.400801
Ak1	M		0.14	0.08	0.09	0.103333	0.01	0.02	0.01	0.0133333	0.129032		0.05	0.02	0.12	0.0633333	0.1	0.04	0.02	0.0533333	0.842105
Aldh1b1	M		603.99	662.21	526.61	597.603	228.34	175.01	140.45	181.267	0.303323		625.3	662.46	632.54	640.1	376.85	345.69	405.89	376.143	0.587632
Alox12b	M		0.22	1.01	0.2	0.476667	0.13	0.75	0.24	0.373333	0.783217		1.67	1.53	3.56	2.25333	0.63	0.65	1.42	0.9	0.399408
Amd2	M		0.48	0.66	0	0.38	0.17	0	0.15	0.106667	0.280702		0	0.32	0.39	0.236667	0.36	0.35	0.37	0.36	1.52113
Arg2	M		126.11	141.97	256.58	174.887	75.41	62.43	146.29	94.71	0.541551		24.16	19.1	13.97	19.0767	14.2	4.27	4.31	7.59333	0.398043
Atp5k	M		271.93	390.8	368.89	343.873	140.53	134	125.49	133.34	0.387759		404.4	328.8	292.26	341.82	258.92	203.27	205.61	222.6	0.65122
Blvra	M		20.39	23.86	19.62	21.29	7.61	8.57	9.25	8.47667	0.398152		26.37	19.92	21.61	22.6333	14.87	13.72	15.15	14.58	0.644183
Car4	M		1.36	0.23	0.09	0.56	0.41	0.11	0.07	0.196667	0.35119		2.82	4.03	4.14	3.66333	1.89	1.7	1.37	1.65333	0.451319
Cbr3	M		279.46	208.3	120.49	202.75	173.07	142.19	94.18	136.48	0.673144		24.63	31.19	63.33	39.7167	5.78	9.92	12.63	9.44333	0.237768
Ces1b	M		2.32	2.61	0.89	1.94	0.56	0.33	0.07	0.32	0.164948		1.25	1.81	1.42	1.49333	1.02	2.17	2.09	1.76	1.17857
Cox6b1	M		533.92	734.32	692.6	653.613	285.94	244.91	247.29	259.38	0.39684		802.67	632.17	625.57	686.803	586.71	477.42	500.55	521.56	0.759402
Cox6b2	M		0.64	0.71	0.14	0.496667	0.07	0.22	0.12	0.136667	0.275168		0.7	0.94	0.73	0.79	0.62	0.88	1.23	0.91	1.1519
Cyp11a1	M		0.16	0.11	0.18	0.15	0.05	0.06	0.02	0.0433333	0.288889		0.14	0.11	0.14	0.13	0.07	0.22	0.09	0.126667	0.974359
Cyp17a1	M		0.21	0.06	0.26	0.176667	0.04	0	0.1	0.0466667	0.264151		0	0	0	0	0.01	0.01	0.01	0.01	#DIV/0!
Cyp1a1	M		0.86	0.22	0.45	0.51	1.54	0.23	2.9	1.55667	3.05229		0.23	0.38	0.11	0.24	0.1	0.05	0.03	0.06	0.25
Cyp26b1	M		0.03	0.19	0.5	0.24	0.01	0.1	0.13	0.08	0.333333		0.17	0.09	0.53	0.263333	0.26	0.07	0.43	0.253333	0.962025
Cyp2d9	M		0.04	0.08	0.34	0.153333	0	0.11	0.05	0.0533333	0.347826		0.29	0.26	0.14	0.23	0.38	0.33	0.09	0.266667	1.15942
Dbi	M		959.65	1177.15	1610.06	1248.95	448.51	317.05	531.6	432.387	0.346199		1040.06	733.35	588.93	787.447	694.46	426.49	396.14	505.697	0.642198
Fa2h	M		0.12	0.1	0.18	0.133333	0.05	0.01	0.06	0.04	0.3		0.1	0.08	0.12	0.1	0.05	0.08	0.05	0.06	0.6
Fabp1	M		2676.46	6365.73	11874.1	6972.1	1235.04	1836.17	4239.53	2436.91	0.349523		284.21	174.74	130.57	196.507	266.36	65.72	62.56	131.547	0.669426
Fabp2	M		351.14	391.41	1489.01	743.853	155	52.64	187.59	131.743	0.177109		230.66	162.78	76.61	156.683	169.38	64.49	49.61	94.4933	0.603085
Fabp6	M		0.55	0.18	0.05	0.26	0.16	0.11	0	0.09	0.346154		163.28	102.78	95.7	120.587	125.9	48.38	42.82	72.3667	0.600122
Fads3	M		5.72	11.79	5.9	7.80333	2.06	4.84	2.19	3.03	0.388296		7.85	12.67	11.87	10.7967	4.55	6.36	5.56	5.49	0.50849
Ffar3	M		1.43	0.71	5.43	2.52333	0.86	0.23	1.72	0.936667	0.371202		1.15	0.42	0.48	0.683333	0.8	0.43	0.47	0.566667	0.829268
Fut4	M		1.84	1.11	0.64	1.19667	0.71	0.59	0.13	0.476667	0.398329		2.52	2.89	2.3	2.57	1.61	1.93	2.24	1.92667	0.749676
G6pc	M		6.22	6.69	54.3	22.4033	2.11	1.64	20.31	8.02	0.357982		7.76	5.21	0.9	4.62333	1.91	0.11	0.05	0.69	0.149243
Galnt5	M		1.71	0.76	0.84	1.10333	0.63	0.33	0.32	0.426667	0.386707		1.52	1.28	1.28	1.36	2.01	1.78	2.01	1.93333	1.42157
Gm2a	M		7.28	12.55	6.35	8.72667	3.09	4.26	2.57	3.30667	0.378915		9.38	10.1	14.78	11.42	6.24	9.24	9.2	8.22667	0.720374
Gm4952	M		0.07	0.06	1.16	0.43	0	0.1	0.24	0.113333	0.263566		0.02	0	0	0.00666667	0.02	0.02	0	0.0133333	2
Gstm1	M		1964.96	1858.27	1210.27	1677.83	814.76	418.54	280.31	504.537	0.300707		145.17	263.25	326.7	245.04	82.05	186.44	211.48	159.99	0.652914
Gstm3	M		1467.18	1290.36	939.36	1232.3	855.88	429.24	238.34	507.82	0.412091		108.5	136.53	156.74	133.923	44	52.37	55.85	50.74	0.378873
Haao	M		0.09	0.25	0.08	0.14	0.04	0.16	0.07	0.09	0.642857		0.28	0.27	0.67	0.406667	0.06	0.16	0.02	0.08	0.196721
Haghl	M		6.6	10.93	9.92	9.15	3.58	5.3	6.49	5.12333	0.559927		12.13	10.78	11.49	11.4667	5.22	3.86	2.96	4.01333	0.35
Hpdl	M		5.42	3.41	3.18	4.00333	1.81	1.2	1.27	1.42667	0.35637		2.94	2.99	1.98	2.63667	0.78	0.36	0.88	0.673333	0.255373
Hrasls5	M		0.04	0.05	0.02	0.0366667	0.05	0.02	0	0.0233333	0.636364		0.14	0.11	0.13	0.126667	0.02	0	0.12	0.0466667	0.368421
Insig1	M		234.71	274.58	323.75	277.68	187.75	163.07	227.08	192.633	0.693724		235.65	210.96	213.91	220.173	89.77	66.93	97.36	84.6867	0.384636
Lfng	M		2.61	7.36	4.02	4.66333	0.85	1.39	1.14	1.12667	0.241601		13.45	13.79	10.5	12.58	11.19	12.08	11.74	11.67	0.927663
Lipg	M		6.12	8.86	5.89	6.95667	2.29	5.52	3.13	3.64667	0.524197		5.06	10.21	7.17	7.48	1.75	2.26	2.34	2.11667	0.282977
Lpcat1	M		0.93	1.23	0.88	1.01333	0.28	0.41	0.36	0.35	0.345395		2.58	2.25	2.26	2.36333	1.1	0.81	1.3	1.07	0.45275
Lpin1	M		5.67	8.73	7.04	7.14667	2.29	2.94	3.18	2.80333	0.392257		10.26	14.04	12.63	12.31	6.61	6.05	8.04	6.9	0.56052
Lyrm7	M		2.39	2.75	1.95	2.36333	1.93	2.52	1.66	2.03667	0.861777		1.98	1.92	2.51	2.13667	0.75	0.72	0.88	0.783333	0.366615
Mb	M		0.04	0.1	0.02	0.0533333	0.05	0.02	0	0.0233333	0.4375		0.31	0.15	1.34	0.6	0.07	0.14	0.35	0.186667	0.311111
Mfng	M		0.15	0.26	0.17	0.193333	0.06	0.12	0.04	0.0733333	0.37931		0.44	0.52	0.5	0.486667	0.22	0.37	0.34	0.31	0.636986
Mns1	M		1.49	2.11	2.29	1.96333	0.89	2.82	1.83	1.84667	0.940577		2.72	1.79	1.54	2.01667	0.61	0.33	1.25	0.73	0.361983
Notum	M		0.38	0.22	0.29	0.296667	0.13	0.12	0.08	0.11	0.370787		0.04	0.05	0.18	0.09	0.08	0.06	0.1	0.08	0.888889
Nudt18	M		1.33	2.64	1.74	1.90333	1.48	2.28	1.88	1.88	0.987741		2.5	2.3	2.82	2.54	0.77	0.93	1.15	0.95	0.374016
Ptgds	M		0.75	0.34	0.11	0.4	0.15	0.14	0.05	0.113333	0.283333		0.03	0.16	0.03	0.0733333	0	0.18	0.1	0.0933333	1.27273
Rdh11	M		54.69	74.85	70.93	66.8233	32.53	19.62	24.62	25.59	0.38295		67.78	68.48	68.56	68.2733	45.77	34.2	36.49	38.82	0.568597
Rgn	M		17.9	30.75	40.49	29.7133	9.54	11.29	10.82	10.55	0.355059		16.48	18.95	10.45	15.2933	14.94	18.54	11.71	15.0633	0.984961
Rrm1	M		26.54	40.34	28.46	31.78	8.98	18.21	10.58	12.59	0.396161		48.51	47.89	47.92	48.1067	30.99	29.95	34.72	31.8867	0.662833
Smpd3	M		29.11	69.7	32.35	43.72	9.42	29.67	12.28	17.1233	0.391659		52.46	73.97	74.29	66.9067	35.28	43.5	56.39	45.0567	0.673426
Sphk1	M		8.52	7.64	13.43	9.86333	5.03	3.66	8.25	5.64667	0.572491		4.92	5.33	5.24	5.16333	2.26	1.43	1.55	1.74667	0.338283
St6galnac4	M		0.35	0.3	0.12	0.256667	0.13	0.13	0.06	0.106667	0.415584		0.38	0.34	0.99	0.57	0.09	0.16	0.29	0.18	0.315789
Steap3	M		3.64	3.37	1.73	2.91333	1.12	1.04	0.28	0.813333	0.279176		3.7	4.35	3.98	4.01	1.29	2.16	1.8	1.75	0.436409
Sult1b1	M		67.35	62.17	109.14	79.5533	34.99	21.11	34.31	30.1367	0.378823		57.69	37.82	50.44	48.65	61.03	23.93	34.57	39.8433	0.818979
Tk1	M		25.84	72.33	38.45	45.54	9.2	29.91	15.45	18.1867	0.399356		73.28	62.7	67.64	67.8733	44.45	39.21	39.05	40.9033	0.602642
Tpst1	M		1.56	2.29	1.61	1.82	0.98	1.78	1.23	1.33	0.730769		1.78	1.58	1.57	1.64333	0.5	0.81	0.65	0.653333	0.397566
Ung	M		9.25	15.64	8.54	11.1433	2.11	6.11	2.4	3.54	0.317679		15.92	16.09	14.2	15.4033	7.03	6.87	8.93	7.61	0.494049
Uqcrh	M		614.52	689.09	675.83	659.813	270.2	202.6	251.94	241.58	0.366134		782.7	595.16	661.08	679.647	558.12	476.35	559.42	531.297	0.781725
Abcb1b	RPME		0.2	0.09	0.17	0.153333	0.03	0.05	0.1	0.06	0.391304		0.04	0.07	0.06	0.0566667	0.08	0.04	0.01	0.0433333	0.764706
Abpa	RPME		0.07	0	0.06	0.0433333	0.36	0	0.06	0.14	3.23077		0.44	0.2	0.16	0.266667	0.07	0.22	0	0.0966667	0.3625
Amica1	RPME		17.64	52.16	28.7	32.8333	4.75	17.28	10.85	10.96	0.333807		40.84	35.12	35.2	37.0533	27.47	35.94	38.76	34.0567	0.919126
Amigo2	RPME		2	1.67	2.33	2	0.89	0.6	0.81	0.766667	0.383333		0.87	0.79	0.8	0.82	1.08	0.97	0.91	0.986667	1.20325
Artn	RPME		0.22	0.48	0.29	0.33	0.16	0.2	0.12	0.16	0.484848		0.28	0.27	0.59	0.38	0.11	0.05	0.09	0.0833333	0.219298
Cd1d1	RPME		0.3	0.37	0.36	0.343333	0.21	0.1	0.09	0.133333	0.38835		0.88	0.65	0.51	0.68	0.73	1.34	1.16	1.07667	1.58333
Cd27	RPME		0.21	0.04	0.1	0.116667	0.63	0.16	0.22	0.336667	2.88571		0.02	0.1	0.21	0.11	0.03	0.05	0.03	0.0366667	0.333333
Cd59b	RPME		0.18	0.11	0.21	0.166667	0.02	0.05	0.02	0.03	0.18		0.04	0	0.05	0.03	0.09	0.09	0	0.06	2
Cd79b	RPME		0.27	0.79	0.2	0.42	0.08	0.17	0.02	0.09	0.214286		0.53	0.52	1	0.683333	0.33	0.41	0.73	0.49	0.717073
Cd9	RPME		51.91	75.61	38.15	55.2233	23.46	21.06	17.55	20.69	0.37466		128	144.96	159.31	144.09	85.05	136.85	144.56	122.153	0.847757
Efna2	RPME		0.62	0.8	0.39	0.603333	0.31	0.32	0.07	0.233333	0.38674		0.49	0.33	0.45	0.423333	0.16	0.35	0.31	0.273333	0.645669
Efna3	RPME		11.65	15.77	8.34	11.92	6.66	5.45	3.18	5.09667	0.427573		13.7	10.89	19.49	14.6933	3.89	4.62	8.01	5.50667	0.374773
Fbln2	RPME		0.37	0.26	0.39	0.34	0.1	0.06	0.17	0.11	0.323529		0.18	0.23	0.18	0.196667	0.28	0.31	0.23	0.273333	1.38983
Gjb1	RPME		17.53	29.15	19.5	22.06	4.29	5.46	5.39	5.04667	0.22877		27.71	27.03	27.81	27.5167	21.87	18.28	18.95	19.7	0.71593
Gjd3	RPME		0.1	0.07	0	0.0566667	0.06	0	0	0.02	0.352941		0.15	0.05	0.2	0.133333	0.06	0.03	0.03	0.04	0.3
Gml	RPME	Apoptosis	1	0.39	1.21	0.866667	1.33	0.59	2.34	1.42	1.63846		1.79	1	2.09	1.62667	0.89	0.13	0.28	0.433333	0.266393
Gna15	RPME		0.31	0.04	0.03	0.126667	0.08	0.04	0.03	0.05	0.394737		0.07	0.01	0.14	0.0733333	0.01	0.01	0.12	0.0466667	0.636364
Itgb1bp2	RPME		0.13	0.07	0.12	0.106667	0.01	0	0.04	0.0166667	0.15625		0.18	0.05	0.1	0.11	0.11	0.09	0.08	0.0933333	0.848485
Lgals2	RPME		1933.66	2402.54	1233.44	1856.55	781.58	623.3	468.83	624.57	0.336415		2246.37	2111.38	2257.7	2205.15	1284.42	1345.28	1595.01	1408.24	0.638613
Lgals3bp	RPME		154.97	160.54	153.94	156.483	77.38	38.09	52.43	55.9667	0.357653		133.83	136.63	140.1	136.853	87.47	81.03	96.21	88.2367	0.644754
Lin7b	RPME		0.36	0.11	0.1	0.19	0.32	0.18	0.29	0.263333	1.38596		0.37	0.12	0.08	0.19	0.07	0.07	0.07	0.07	0.368421
Ly6c1	RPME		0.91	1.42	0.44	0.923333	0.49	0.26	0.21	0.32	0.34657		6.45	0.91	10.52	5.96	2.03	3.48	5.79	3.76667	0.631991
Ly6f	RPME		0.05	0.36	0.41	0.273333	0.01	0	0.05	0.02	0.0731707		0	0.03	0	0.01	0.06	0	0	0.02	2
Ly6g6f	RPME		3.28	1.04	4.8	3.04	4.23	1.47	3.92	3.20667	1.05482		1.1	0.4	0.46	0.653333	0.23	0.16	0.22	0.203333	0.311224
Mcam	RPME		0.75	0.23	0.19	0.39	0.08	0.08	0.03	0.0633333	0.162393		0.11	0.07	0.33	0.17	0.11	0.17	0.19	0.156667	0.921569
Mpp2	RPME		0.6	0.75	1.23	0.86	0.42	0.6	1.02	0.68	0.790698		0.47	0.65	0.67	0.596667	0.19	0.29	0.16	0.213333	0.357542
Nfam1	RPME		0.06	0.3	0.09	0.15	0.04	0.14	0.04	0.0733333	0.488889		0.32	0.19	0.58	0.363333	0.07	0.03	0.06	0.0533333	0.146789
Nid1	RPME		0.41	1.18	1.61	1.06667	0.21	0.34	0.72	0.423333	0.396875		0.48	0.34	0.47	0.43	0.45	0.2	0.26	0.303333	0.705426
Pcdh20	RPME		0.49	0.16	0.45	0.366667	0.23	0.04	0.16	0.143333	0.390909		0.35	0.14	0.14	0.21	0.44	0.31	0.2	0.316667	1.50794
Pcdh8	RPME		0.28	0.35	0.19	0.273333	0.05	0.16	0.08	0.0966667	0.353659		0.9	1.35	0.59	0.946667	1.07	2.07	1.86	1.66667	1.76056
Rgma	RPME		0.45	0.45	0.2	0.366667	0.1	0.08	0.08	0.0866667	0.236364		0.59	0.67	0.68	0.646667	0.25	0.36	0.45	0.353333	0.546392
Tfrc	RPME	Receptor	20.17	62.69	41.93	41.5967	13.5	19.82	13.33	15.55	0.373828		73.39	55.39	49.97	59.5833	71.19	48.49	40.69	53.4567	0.897175
Timp2	RPME		0.37	0.63	0.33	0.443333	0.21	0.23	0.08	0.173333	0.390977		0.77	0.92	1.08	0.923333	0.47	1.27	1.33	1.02333	1.1083
Tlr1	RPME	Receptor	0.12	0.52	0.65	0.43	0	0.17	0.06	0.0766667	0.178295		1.96	2.04	1.87	1.95667	1.13	0.84	1.18	1.05	0.536627
Tmeff1	RPME		0.24	0.22	0.14	0.2	0.11	0.06	0.05	0.0733333	0.366667		0.1	0.02	0.04	0.0533333	0.01	0.03	0.04	0.0266667	0.5
Tnfrsf8	RPME	Receptor	1.47	1.05	0.26	0.926667	0.37	0.46	0.04	0.29	0.31295		1.09	3.07	3.86	2.67333	0.45	1.18	1.04	0.89	0.332918
Ccrl1	RPME	Receptor	1.42	0.46	2.22	1.36667	0.52	0.15	0.79	0.486667	0.356098		0.65	0.31	0.26	0.406667	0.71	0.17	0.34	0.406667	1
Chrm1	RPME	Receptor	0.2	0.07	0.12	0.13	0.03	0	0	0.01	0.0769231		0.33	0.48	0.34	0.383333	0.37	0.43	0.34	0.38	0.991304
Clstn3	RPME		0.03	0.11	0.04	0.06	0.02	0.06	0.05	0.0433333	0.722222		0.1	0.25	0.23	0.193333	0.08	0.09	0.05	0.0733333	0.37931
Cntfr	RPME	Receptor	0.23	0.15	0.07	0.15	0.08	0.08	0.03	0.0633333	0.422222		0.26	0.17	0.28	0.236667	0.07	0.06	0.05	0.06	0.253521
Eda2r	RPME	Receptor	2.19	2.36	1.55	2.03333	0.4	0.77	0.96	0.71	0.34918		1.07	1.14	2.83	1.68	1.07	0.79	2.04	1.3	0.77381
Epb4.2	RPME		0.24	0.63	0.42	0.43	0.05	0.27	0.12	0.146667	0.341085		0.52	0.36	0.37	0.416667	0.64	0.56	0.65	0.616667	1.48
Fgfr2	RPME	Receptor	2.85	6.21	4.19	4.41667	0.98	2.55	1.39	1.64	0.371321		6.31	8.63	9.18	8.04	5.01	6.67	6.75	6.14333	0.764096
Fzd2	RPME	Receptor	0.43	2.78	0.81	1.34	0.06	0.82	0.14	0.34	0.253731		2.99	3.92	3.34	3.41667	1.99	2.98	2.83	2.6	0.760976
Gpr20	RPME	Receptor	0.11	0.36	0.21	0.226667	0.14	0.3	0.11	0.183333	0.808824		0.49	0.37	1.08	0.646667	0.14	0.1	0.35	0.196667	0.304124
Gprc5b	RPME	Receptor	0.09	0.22	0.14	0.15	0.06	0.04	0.03	0.0433333	0.288889		0.11	0.05	0.11	0.09	0.04	0.04	0.08	0.0533333	0.592593
Hapln4	RPME		2.99	1.06	1.98	2.01	3.36	1.13	1.42	1.97	0.9801		0.26	0.21	0.26	0.243333	0.11	0.04	0.07	0.0733333	0.30137
Hspg2	RPME		4.6	4.4	2.8	3.93333	1.43	1.78	0.9	1.37	0.348305		1.04	3.03	3.81	2.62667	1.19	2.16	1.91	1.75333	0.667513
Il9r	RPME	Receptor	0.12	0.07	0.34	0.176667	0.03	0.01	0.14	0.06	0.339623		0.04	0.03	0.02	0.03	0.01	0.01	0.03	0.0166667	0.555556
Klrb1b	RPME	Receptor	0.01	0.16	0.09	0.0866667	0.06	0.09	0.07	0.0733333	0.846154		0.24	0.11	0.06	0.136667	0.01	0	0	0.00333333	0.0243902
Kremen2	RPME	Receptor	0.48	0.23	0.17	0.293333	0.18	0.14	0.12	0.146667	0.5		1.29	1.4	1.01	1.23333	0.54	0.31	0.6	0.483333	0.391892
Lrfn1	RPME		0.16	0.29	0.11	0.186667	0.08	0.07	0.04	0.0633333	0.339286		0.11	0.13	0.15	0.13	0.09	0.09	0.1	0.0933333	0.717949
Lrp1	RPME	Receptor	9.42	6.46	9.54	8.47333	2.49	1.46	1.64	1.86333	0.219906		2.92	7.17	5.14	5.07667	3.99	4.06	2.3	3.45	0.67958
Mxra7	RPME		10.37	7.87	5.12	7.78667	5.84	3.95	2.66	4.15	0.532962		2.27	2.13	1.53	1.97667	1.08	0.83	0.37	0.76	0.384486
Notch3	RPME	Receptor	0.33	0.31	0.12	0.253333	0.06	0.12	0.1	0.0933333	0.368421		0.05	0.18	0.29	0.173333	0.04	0.14	0.13	0.103333	0.596154
P2ry6	RPME	Receptor	2.82	3.16	1.37	2.45	0.39	0.39	0.18	0.32	0.130612		6.38	7.2	9.21	7.59667	3.42	5.28	7.48	5.39333	0.709961
Papln	RPME		9.18	20.28	12.14	13.8667	2.83	7.48	5.32	5.21	0.375721		6.74	12.5	12.61	10.6167	6.77	8.83	8.32	7.97333	0.75102
Paqr7	RPME	Receptor	1.62	5.12	7.62	4.78667	0.49	0.95	1.72	1.05333	0.220056		2.85	2.18	2.56	2.53	1.67	1.19	2.08	1.64667	0.650856
Pigr	RPME	Receptor	656.66	843.97	836.62	779.083	346.5	230.36	306.05	294.303	0.377756		471.34	575.67	651.85	566.287	505.88	435.45	480.99	474.107	0.83722
Sema4c	RPME		1.54	3.65	1.87	2.35333	0.36	0.87	0.49	0.573333	0.243626		4.74	7.37	4.37	5.49333	4.11	6.38	4.27	4.92	0.895631
Sema5a	RPME		1.57	1.56	1.16	1.43	0.49	0.76	0.37	0.54	0.377622		2.07	3.23	4.22	3.17333	2.86	4.49	5.41	4.25333	1.34034
Sema6c	RPME		0.22	0.17	0.2	0.196667	0.07	0.03	0.06	0.0533333	0.271186		0.16	0.15	0.2	0.17	0.26	0.28	0.24	0.26	1.52941
Sema7a	RPME		31.27	52.32	34.7	39.43	7.53	7.05	5.47	6.68333	0.169499		36.12	49.62	49.65	45.13	39.12	60.51	54.6	51.41	1.13915
Tsku	RPME		41.06	19.73	20.04	26.9433	34.34	13.7	11.1	19.7133	0.731659		7.8	10.56	8.4	8.92	2.53	4.13	3.66	3.44	0.38565
Chadl	SEC		0.15	0.11	0.06	0.106667	0.09	0.11	0.03	0.0766667	0.71875		0.12	0.1	0.14	0.12	0	0.04	0.06	0.0333333	0.277778
Cma1	SEC		0.1	0.02	0.01	0.0433333	0.09	0	0	0.03	0.692308		0.25	0.04	0.08	0.123333	0.09	0	0.05	0.0466667	0.378378
Fgfbp1	SEC		285.48	320.69	160.82	255.663	120.09	66.12	38.75	74.9867	0.293302		272.21	271.95	342.26	295.473	158.18	181.7	260.99	200.29	0.677862
Gkn3	SEC		0.05	3.17	1.42	1.54667	0.03	0.75	0.39	0.39	0.252155		1.08	1	1.18	1.08667	1.2	1.18	1.28	1.22	1.1227
Hamp2	SEC		0.47	2.08	0.51	1.02	0	0.74	0	0.246667	0.24183		0	0	0	0	0	0	0	0	#DIV/0!
Klk1b5	SEC		0	0.26	0	0.0866667	0	0.06	0	0.02	0.230769		0	0.2	0.36	0.186667	0	0	0.11	0.0366667	0.196429
Ltbp4	SEC		0.23	0.22	0.08	0.176667	0.05	0.06	0.03	0.0466667	0.264151		0.18	0.26	0.77	0.403333	0.13	0.21	0.56	0.3	0.743802
Penk	SEC		0.02	0.19	0.34	0.183333	0.02	0.07	0.07	0.0533333	0.290909		0.02	0	0.02	0.0133333	0	0	0.07	0.0233333	1.75
Pros1	SEC		1.84	2.14	3.61	2.53	0.67	0.74	1.19	0.866667	0.342556		2.11	2.13	1.36	1.86667	2.16	2.13	1.55	1.94667	1.04286
S100a11	SEC		126.34	309.41	213.74	216.497	72.99	68.21	103.24	81.48	0.376357		474.7	409.96	712.43	532.363	310.94	343.18	539.17	397.763	0.747165
S100a5	SEC		0.53	0.35	0	0.293333	0.06	0.06	0.05	0.0566667	0.193182		0.37	0.17	0.27	0.27	0.19	0.12	0.13	0.146667	0.54321
Saa1	SEC		0.2	0	0	0.0666667	0.38	0	0	0.126667	1.9		0.78	0.07	2.93	1.26	0.58	0	0.68	0.42	0.333333
Thpo	SEC		0.14	0.11	0.13	0.126667	0.07	0.09	0.16	0.106667	0.842105		0.24	0.12	0.1	0.153333	0.06	0.06	0.03	0.05	0.326087
Tnfsf10	SEC		10.2	9.28	10.18	9.88667	4.27	3.39	2.09	3.25	0.328726		12.31	12.13	12.71	12.3833	7.56	7.15	7.34	7.35	0.59354
Vash2	SEC		0.25	0.98	0.7	0.643333	0.15	0.3	0.31	0.253333	0.393782		0.37	0.41	0.61	0.463333	0.17	0.32	0.41	0.3	0.647482
Hspb1	Stress		0.16	0.03	0.05	0.08	0.06	0.06	0.07	0.0633333	0.791667		0.06	0.11	0.32	0.163333	0	0.06	0.06	0.04	0.244898
Noxa1	Stress	Immunity	5.88	26.08	11.61	14.5233	4.08	15.32	7.76	9.05333	0.623365		21.76	21.48	28.85	24.03	8.63	8	8.96	8.53	0.354973
1700003E16Rik			1.72	2.06	1.77	1.85	0.69	0.97	0.75	0.803333	0.434234		1.21	2.16	1.59	1.65333	0.57	0.62	0.72	0.636667	0.385081
1700007E06Rik			0.47	1.57	2.19	1.41	0.13	0.4	0.99	0.506667	0.359338		0.38	0.3	0.24	0.306667	0.39	0.16	0.06	0.203333	0.663043
1700007K09Rik			0.03	0.04	0	0.0233333	0.04	0.16	0	0.0666667	2.85714		0.15	0	0.25	0.133333	0	0.08	0	0.0266667	0.2
1700007K13Rik			0.49	0.16	0.21	0.286667	0.07	0.11	0.06	0.08	0.27907		0.17	0.22	0.12	0.17	0.25	0.14	0.07	0.153333	0.901961
1700023E05Rik			0.05	0.05	0.05	0.05	0.03	0.06	0.04	0.0433333	0.866667		0.11	0.14	0.06	0.103333	0.03	0.01	0	0.0133333	0.129032
1700066B19Rik			2.11	3.27	1.52	2.3	1.2	1.15	1.03	1.12667	0.489855		4.44	3.32	5.68	4.48	0.84	0.9	2.18	1.30667	0.291667
2310014H01Rik			0.42	0.51	1.77	0.9	0.3	0.23	1.02	0.516667	0.574074		0.4	0.26	0.38	0.346667	0.05	0.18	0.16	0.13	0.375
2810417H13Rik			28.15	64.14	43.52	45.27	8.48	18.04	12	12.84	0.283632		89.08	69.28	78.09	78.8167	40.84	35.13	40.83	38.9333	0.493973
4632428N05Rik			11.13	5.1	2.42	6.21667	6.79	4.17	1.26	4.07333	0.655228		1.78	1.48	1.75	1.67	0.78	0.38	0.78	0.646667	0.387226
4732415M23Rik			0	0.05	0.04	0.03	0	0.08	0.04	0.04	1.33333		0.25	0	0.17	0.14	0.05	0	0.05	0.0333333	0.238095
4732471J01Rik			0.21	0.17	0.32	0.233333	0.13	0	0.08	0.07	0.3		0	0.08	0	0.0266667	0.09	0.09	0.19	0.123333	4.625
4931408A02Rik			0.16	0.1	0.03	0.0966667	0.14	0.02	0.09	0.0833333	0.862069		0.12	0.11	0.17	0.133333	0.03	0.02	0.08	0.0433333	0.325
4933407L21Rik			0.27	0.15	0.26	0.226667	0	0.06	0.14	0.0666667	0.294118		0.3	0.12	0.02	0.146667	0.24	0.19	0.14	0.19	1.29545
4933415A04Rik			0.72	0.93	0.58	0.743333	0.38	0.35	0.35	0.36	0.484305		0.85	0.64	0.45	0.646667	0.17	0.28	0.32	0.256667	0.396907
4933427E11Rik			0.1	0.19	0.17	0.153333	0.09	0.29	0.33	0.236667	1.54348		0.23	0.05	0.11	0.13	0.03	0.03	0.03	0.03	0.230769
6030419C18Rik			0.32	0.15	0.05	0.173333	0.94	0.5	0.16	0.533333	3.07692		0.31	0.26	0.81	0.46	0	0.11	0.33	0.146667	0.318841
6530418L21Rik			2.05	0.51	0.37	0.976667	0.25	0.21	0.29	0.25	0.255973		0.34	0.47	0.76	0.523333	0.24	0.18	0.64	0.353333	0.675159
6720489N17Rik			1.51	4.45	1.57	2.51	0.27	1.44	0.23	0.646667	0.257636		2.19	2.02	5.51	3.24	0.84	0.83	1.75	1.14	0.351852
9830001H06Rik			0.5	1.03	0.66	0.73	0.3	0.29	0.22	0.27	0.369863		0.21	0.32	0.47	0.333333	0.1	0.21	0.31	0.206667	0.62
A830005F24Rik			0.06	0.09	0.14	0.0966667	0.11	0.13	0.19	0.143333	1.48276		0.16	0.15	0.25	0.186667	0.06	0.06	0.1	0.0733333	0.392857
AC129078.1			3.3	4.28	1.58	3.05333	2.65	0	3.83	2.16	0.707424		5.38	1.65	6	4.34333	1.83	0	1.9	1.24333	0.286262
AC154727.1			0.29	0.15	0	0.146667	0	0.16	0.53	0.23	1.56818		0.62	0.29	0.35	0.42	0	0.31	0	0.103333	0.246032
AC161456.1			45.96	63.91	47.54	52.47	19.76	21.64	17.62	19.6733	0.374944		80.32	54.85	59.8	64.99	41.72	35.59	42.02	39.7767	0.612043
AC162465.1			0.28	0.37	0.67	0.44	1.18	0.59	0.47	0.746667	1.69697		0.63	0.67	0.71	0.67	0.27	0.15	0.13	0.183333	0.273632
AC166833.1			0.14	0.17	0.42	0.243333	0.19	0.74	0.83	0.586667	2.41096		0.16	0.18	0.05	0.13	0.05	0.02	0	0.0233333	0.179487
Adprhl1			0.24	0.39	0.4	0.343333	0.16	0.19	0.08	0.143333	0.417476		0.23	0.19	0.26	0.226667	0.05	0.05	0.07	0.0566667	0.25
AI427809			2.81	2.75	3.39	2.98333	0.98	0.44	0.89	0.77	0.258101		25.73	14.32	13.13	17.7267	10.14	8.68	7.39	8.73667	0.492854
AI467606			0.11	0.12	0.13	0.12	0.06	0.03	0.04	0.0433333	0.361111		0.04	0.05	0.04	0.0433333	0.06	0.08	0.04	0.06	1.38462
Aipl1			0.04	0.2	0.02	0.0866667	0	0.02	0.01	0.01	0.115385		0.11	0.09	0.23	0.143333	0.06	0.04	0.07	0.0566667	0.395349
Ambn			0.15	0.62	0.65	0.473333	0.01	0.17	0.19	0.123333	0.260563		0.17	0.08	0.04	0.0966667	0.16	0.03	0.11	0.1	1.03448
Ankle1			5.11	6.08	5.37	5.52	1.2	2.62	1.5	1.77333	0.321256		8.01	7.91	7.16	7.69333	5.28	3.95	5.23	4.82	0.626516
B930041F14Rik			10.08	6.48	6.44	7.66667	3.97	2.49	2.55	3.00333	0.391739		9.45	6.66	9.28	8.46333	3.85	2.18	3.26	3.09667	0.365892
Btn2a2			0.37	1.3	0.85	0.84	0.4	1.93	1.82	1.38333	1.64683		0.27	0.22	0.67	0.386667	0	0.03	0.15	0.06	0.155172
Ccdc69			1.2	2.25	1.59	1.68	0.5	1.43	0.79	0.906667	0.539683		1.83	1.44	1.81	1.69333	0.46	0.59	0.53	0.526667	0.311024
Ccdc88b			0.24	0.22	0.28	0.246667	0.11	0.23	0.25	0.196667	0.797297		0.26	0.34	0.46	0.353333	0.14	0.05	0.08	0.09	0.254717
Crip1			624.66	591.55	948.13	721.447	281.63	90.38	216.44	196.15	0.271884		965.83	709.61	734.22	803.22	662.14	368.77	410.01	480.307	0.597976
Crip2			0.52	0.53	0.27	0.44	0.39	0.2	0.32	0.303333	0.689394		0.22	0.43	0.81	0.486667	0.17	0.19	0.21	0.19	0.390411
Cxx1b			3.57	4.63	1.71	3.30333	2.87	9.18	4.97	5.67333	1.71746		5.83	0	4.34	3.39	1.98	0	2.06	1.34667	0.397247
D930020E02Rik			0.18	0.16	0.73	0.356667	0.15	0.2	0.58	0.31	0.869159		0.16	0.2	0.2	0.186667	0.06	0.07	0.05	0.06	0.321429
D930048N14Rik			2.13	2.19	2	2.10667	0.53	0.96	0.69	0.726667	0.344937		2.24	2.44	2.91	2.53	3.13	5.93	4.31	4.45667	1.76153
Dbndd2			0.76	0.79	0.36	0.636667	0.33	0.26	0.49	0.36	0.565445		0.5	0.3	1.48	0.76	0.17	0	0	0.0566667	0.0745614
Ddn			0.27	0.12	0.03	0.14	0.14	0.07	0.05	0.0866667	0.619048		0.23	0.17	0.45	0.283333	0.08	0.04	0.14	0.0866667	0.305882
Dynlt1b			12.73	26.18	31.7	23.5367	10.75	7.91	7.67	8.77667	0.372893		40.78	28.12	29.26	32.72	26.29	20.45	16.5	21.08	0.644254
Epn3			2.02	3.61	1.7	2.44333	0.77	1.09	0.59	0.816667	0.334243		2.61	2.81	2.75	2.72333	1.62	2.77	2.97	2.45333	0.900857
Fam151a			0.15	0.14	0.13	0.14	0	0.03	0.04	0.0233333	0.166667		1.2	1.43	1.07	1.23333	1.47	0.18	0.48	0.71	0.575676
Fam171a2			0.37	1.42	0.47	0.753333	0.19	0.47	0.18	0.28	0.371681		0.91	0.97	1.14	1.00667	0.44	0.61	0.68	0.576667	0.572848
Fam19a1			0.04	0.06	0.49	0.196667	0.05	0.01	0.15	0.07	0.355932		0.09	0.01	0.03	0.0433333	0.06	0.04	0.02	0.04	0.923077
Fam69b			3.23	2.02	1.39	2.21333	1.11	0.89	0.57	0.856667	0.387048		3.69	2.89	3.54	3.37333	1.6	0.88	1.57	1.35	0.400198
Fam78a			5.03	3.19	5.29	4.50333	2.31	1.37	2.53	2.07	0.45966		2.76	2.86	1.88	2.5	1.48	0.63	0.78	0.963333	0.385333
Fbxo17			0.15	0.3	0.17	0.206667	0.04	0.12	0.05	0.07	0.33871		0.35	0.16	0.21	0.24	0.09	0.04	0.08	0.07	0.291667
Gm10012			3.38	5.85	6.49	5.24	5.43	3.87	3.14	4.14667	0.791349		3.68	2.26	0	1.98	0	0	1.3	0.433333	0.218855
Gm10109			0	0.25	0	0.0833333	0.05	0.02	0.02	0.03	0.36		0.09	0.13	0.16	0.126667	0	0	0.1	0.0333333	0.263158
Gm10244			0.14	0.13	0.15	0.14	0.02	0	0.13	0.05	0.357143		0.25	0.14	0.07	0.153333	0.38	0.13	0.07	0.193333	1.26087
Gm10250			0.58	0.3	0.83	0.57	0.31	0.33	0	0.213333	0.374269		0.63	0.58	0	0.403333	0	0.63	0	0.21	0.520661
Gm10290			1.21	1.39	1.41	1.33667	1	1.84	1.86	1.56667	1.17207		1.17	2.14	0.33	1.21333	0.6	0.29	0.31	0.4	0.32967
Gm10384			0.45	0.16	0.59	0.4	0.11	0.02	0.04	0.0566667	0.141667		1.51	1.52	0.9	1.31	0.94	0.69	0.61	0.746667	0.569975
Gm10642			0.17	1.2	0.61	0.66	0.16	0.14	0.11	0.136667	0.207071		1.33	1.25	1.22	1.26667	1.22	0.73	0.49	0.813333	0.642105
Gm10749			0.11	0.11	0.2	0.14	0.11	0	0.1	0.07	0.5		0.69	0.21	0	0.3	0	0.23	0	0.0766667	0.255556
Gm11003			1.26	0	0.6	0.62	0.67	0	0	0.223333	0.360215		0	0	1.53	0.51	0	0	1.46	0.486667	0.954248
Gm11062			0.45	19.78	7.65	9.29333	0.27	8.39	1.53	3.39667	0.365495		2.72	6.69	4.06	4.49	1	8.99	3.98	4.65667	1.03712
Gm12184			1.62	3.03	2.8	2.48333	1.04	0.74	0.9	0.893333	0.359732		1.41	1.95	4.73	2.69667	2.16	0	3.75	1.97	0.730532
Gm12355			0.06	0.12	0.06	0.08	0.13	0	0.11	0.08	1		0	0.36	0.15	0.17	0	0	0.14	0.0466667	0.27451
Gm14393			0.26	0.53	0	0.263333	0.55	0.58	0.71	0.613333	2.32911		0.55	0.51	1.86	0.973333	0.57	0.56	0	0.376667	0.386986
Gm14492			0.14	0.06	0.13	0.11	0.03	0.03	0.02	0.0266667	0.242424		0.04	0.02	0.02	0.0266667	0.02	0.04	0	0.02	0.75
Gm16382			10.72	33.36	0	14.6933	0	0	0	0	0		0	42.85	52.02	31.6233	0	0	24.75	8.25	0.260883
Gm1965			0.01	0	0	0.00333333	0.02	0	0	0.00666667	2		0.13	0.03	0.18	0.113333	0	0.06	0.07	0.0433333	0.382353
Gm2897			0.26	0	0	0.0866667	0.56	0.3	0	0.286667	3.30769		0.57	0.52	0.63	0.573333	0	0	0.6	0.2	0.348837
Gm3940			0.21	0.44	0.21	0.286667	0	0	0.2	0.0666667	0.232558		0	0.43	2.08	0.836667	0	0.47	0	0.156667	0.187251
Gm4980			0.17	0.48	0.49	0.38	0.04	0.12	0.55	0.236667	0.622807		0.15	0.34	0.04	0.176667	0.11	0	0	0.0366667	0.207547
Gm5451			21.43	44.48	10.28	25.3967	0	12.24	0	4.08	0.160651		0	64.27	52.02	38.7633	0	23.38	0	7.79333	0.201049
Gm5533			0.16	0.14	0.29	0.196667	0.02	0.11	0.06	0.0633333	0.322034		0.22	0.2	0.35	0.256667	0.08	0.13	0.08	0.0966667	0.376623
Gm6055			10.72	18.53	10.28	13.1767	7.64	0	3.32	3.65333	0.277258		23.3	21.42	17.34	20.6867	7.94	7.79	8.25	7.99333	0.3864
Gm6723			0.37	0.23	0.21	0.27	0.39	0	0	0.13	0.481481		0.32	0.44	0.53	0.43	0.33	0	0.17	0.166667	0.387597
Gm9138			1.89	4.25	3.02	3.05333	1.35	0.72	1.46	1.17667	0.385371		2.74	5.04	3.06	3.61333	4.9	4.81	8.01	5.90667	1.63469
Gm9817			0.03	0.02	0.03	0.0266667	0.01	0	0.11	0.04	1.5		0.94	0.3	0.09	0.443333	0.34	0.07	0	0.136667	0.308271
Gm9933			0.19	0.15	0.25	0.196667	0.03	0.1	0.04	0.0566667	0.288136		0.23	0.12	0.26	0.203333	0.12	0.1	0.1	0.106667	0.52459
Gramd2			13.47	8.54	11.68	11.23	16.79	11.98	18.67	15.8133	1.40813		9.7	10.09	10.55	10.1133	4.08	2.34	3.72	3.38	0.334212
Hemt1			1.27	0.22	1.22	0.903333	0.61	0.77	1.31	0.896667	0.99262		1.72	0.33	2.61	1.55333	0.74	0.26	0.28	0.426667	0.274678
Hn1			152.77	170.18	145.09	156.013	75.76	53.37	55.32	61.4833	0.39409		213.06	173.31	158.54	181.637	116.23	108.65	119.25	114.71	0.631535
Iqck			0.05	0.35	0.19	0.196667	0.26	0.45	0.27	0.326667	1.66102		0.29	0.05	0.18	0.173333	0.09	0.06	0.02	0.0566667	0.326923
Irgc1			0.02	0	0	0.00666667	0.01	0	0.01	0.00666667	1		0.1	0.08	0.28	0.153333	0.01	0.01	0.07	0.03	0.195652
Kbtbd11			3.32	7.38	8.38	6.36	2.25	4	4.25	3.5	0.550314		3.07	1.84	3.16	2.69	1.11	0.29	0.96	0.786667	0.292441
Kctd7			0.41	0.56	0.5	0.49	0.48	0.43	0.45	0.453333	0.92517		0.76	0.7	0.71	0.723333	0.21	0.18	0.39	0.26	0.359447
Ky			0.3	1.19	1.04	0.843333	0.27	0.28	0.3	0.283333	0.335968		0.36	0.33	0.55	0.413333	0.37	0.4	0.78	0.516667	1.25
Lrrc31			3.43	14.39	5.39	7.73667	1.47	4.06	2.18	2.57	0.332184		8.5	11.67	20.69	13.62	12.55	25.77	25.85	21.39	1.57048
Oaf			7.74	11.39	7.33	8.82	2.97	3.61	3.97	3.51667	0.398715		6.66	6.88	7.62	7.05333	3.55	3.39	3.77	3.57	0.506144
Ociad2			52.34	94.69	82.98	76.67	19.67	33.58	34.42	29.2233	0.381157		77.96	75.56	71.75	75.09	57.3	67.7	65.92	63.64	0.847516
Pramel4			1.07	1.98	9.94	4.33	0.38	0.54	2.32	1.08	0.249423		0.26	0	0.58	0.28	0.26	0	0	0.0866667	0.309524
Pramel5			0.62	0.79	3.55	1.65333	0.7	0.32	2.3	1.10667	0.669355		0.55	0.3	0.25	0.366667	0.34	0.03	0.03	0.133333	0.363636
Prr9			0.02	0	0	0.00666667	0.04	0	0.02	0.02	3		0.21	0.17	0.05	0.143333	0.02	0	0.02	0.0133333	0.0930233
Rbp7			8.12	17.65	6.64	10.8033	1.53	5.11	1.68	2.77333	0.256711		24.12	19.47	6.8	16.7967	13.32	13.57	5.08	10.6567	0.634451
Rgag4			0.35	0.53	0.46	0.446667	0.08	0.2	0.14	0.14	0.313433		0.2	0.14	0.24	0.193333	0.14	0.21	0.23	0.193333	1
Rimbp3			0.47	0.41	0.39	0.423333	0.24	0.37	0.21	0.273333	0.645669		0.33	0.39	0.44	0.386667	0.07	0.07	0.12	0.0866667	0.224138
Rnase12			0.06	0.11	0	0.0566667	0.05	0	0	0.0166667	0.294118		0.33	0.22	0.26	0.27	0.05	0	0.1	0.05	0.185185
RP23-198H15.3			0.61	0.42	0.58	0.536667	0	0.23	0.38	0.203333	0.378882		1.32	0.4	0.49	0.736667	0.45	0.88	1.4	0.91	1.23529
RP23-369M17.1			0	0.6	0.37	0.323333	0.2	0.44	0.18	0.273333	0.845361		0.83	0	0.93	0.586667	0.43	0	0	0.143333	0.244318
RP23-378I13.5			0.82	1.43	1.85	1.36667	1.47	0.63	0.77	0.956667	0.7		1.79	2.75	0.67	1.73667	0	0.6	0	0.2	0.115163
Rpl21-ps14			1.19	1.24	0	0.81	0.64	0	0	0.213333	0.263374		1.29	0	2.89	1.39333	0	2.6	0	0.866667	0.62201
Rpl21-ps3			2.3	0.4	0	0.9	0	0.44	0	0.146667	0.162963		0	0.77	0.93	0.566667	0	0	0	0	0
Rpl7a-ps3			1.4	1.93	0.89	1.40667	1	2.13	0.86	1.33	0.945498		1.01	0.93	2.26	1.4	0	1.02	0	0.34	0.242857
Rpl7a-ps5			0.26	0.26	0.49	0.336667	0	0.58	0.24	0.273333	0.811881		0	0.51	1.24	0.583333	0	0	0.59	0.196667	0.337143
Tcp10b			0	0	0.5	0.166667	0.37	0.2	0.64	0.403333	2.42		0.75	0.35	0.84	0.646667	0	0	0.4	0.133333	0.206186
Tcstv3			0.47	0.2	3.21	1.29333	0.17	0	0.91	0.36	0.278351		0.09	0	0	0.03	0.09	0.09	0	0.06	2
Tmem107			2.58	5.12	2.8	3.5	1.9	4.03	2.45	2.79333	0.798095		5.8	6.49	7.37	6.55333	2.33	2.27	3.16	2.58667	0.39471
Tmem121			0.64	0.27	0.7	0.536667	0.22	0.08	0.18	0.16	0.298137		0.32	0.18	0.29	0.263333	0.12	0.14	0.16	0.14	0.531646
Tmem229a			0.2	0.12	0.55	0.29	0.03	0.05	0.09	0.0566667	0.195402		0.21	0.1	0.08	0.13	0.38	0.25	0.18	0.27	2.07692
Tmem37			48.7	18.99	32.31	33.3333	38.15	15.95	50.82	34.9733	1.0492		9.42	7.91	4.84	7.39	3.77	1.43	0.92	2.04	0.276049
Trp53i11			4.09	8.81	5.33	6.07667	2.17	2.9	1.65	2.24	0.368623		7.71	8.83	9.03	8.52333	5.09	6.7	6	5.93	0.695737
Unc93a			0.76	1.22	3.59	1.85667	0.36	0.71	3.11	1.39333	0.750449		1.95	0.72	0.97	1.21333	0.78	0.18	0.24	0.4	0.32967
Wdr31			0.84	1.58	1.2	1.20667	0.4	1.22	0.53	0.716667	0.593923		2.23	2.33	2.54	2.36667	0.95	0.72	0.93	0.866667	0.366197
Wdr89			1.37	2.62	1.58	1.85667	1.32	2.32	1.27	1.63667	0.881508		1.78	2.37	2.56	2.23667	0.7	0.68	1.07	0.816667	0.365127
Wdr93			0.19	0.31	0.18	0.226667	0.11	0.34	0.2	0.216667	0.955882		0.14	0.1	0.22	0.153333	0.03	0.07	0.06	0.0533333	0.347826
Xkr5			0.66	3.65	1.99	2.1	0.16	0.7	0.59	0.483333	0.230159		2.51	1.78	2.56	2.28333	1.22	0.85	1.3	1.12333	0.491971
Zc3hav1l			0.5	0.85	0.48	0.61	0.29	0.2	0.19	0.226667	0.371585		0.49	0.44	0.67	0.533333	0.38	0.61	0.78	0.59	1.10625
Zfp534			0.21	0.67	0	0.293333	0.23	0	0	0.0766667	0.261364		0	0.43	0	0.143333	0	0.47	0.5	0.323333	2.25581
Zfp934			5.92	10.05	6.58	7.51667	1.31	1.83	2.09	1.74333	0.231929		11.86	13.15	15.06	13.3567	6.68	5.74	9.77	7.39667	0.553781

## Sheet: Induced genes >2.5 fold
Sheet 4 of 4 - List of genes found to be upregulated more than 2.5 fold in murine enteroids upon either thapsigargin or nutrient starvation
	GER: Gene expression regulation
	SEC: Secreted factors
	CytS: Cytoskeleton and structure
	M: Metabolism
	CT: Channels and Transporters
	RPME: Receptors, Plama membrane and ECM proteins
	CS: Cellular signaling
	Stress: Stress
	Misc: Miscellenous
	Main Functional group	Sub-Category	Control #1				THAPSIGARGIN				THAPSI/CTR		Control #2				STARVATION				STARV/CTR
			Sample A	Sample B	Sample C	Average	Sample A	Sample B	Sample C	Average			Sample A	Sample B	Sample C	Average	Sample A	Sample B	Sample C	Average
Rab38	CS	Small GTPase	0.06	0.48	0.44	0.326667	0.26	1.88	1.21	1.11667	3.41837		0	0.02	0.04	0.02	0	0	0	0	0
Dub1	CS		0.01	0	0.03	0.0133333	0.04	0.24	0.36	0.213333	16		0.02	0	0	0.00666667	0	0	0	0	0
Pde6g	CS	phosphatase	0.15	0.1	0.12	0.123333	0.47	1.21	0.65	0.776667	6.2973		0.16	0.15	0.31	0.206667	0	0.03	0.09	0.04	0.193548
Styxl1	CS	phosphatase	0.08	0.16	0.12	0.12	0.11	0.66	0.45	0.406667	3.38889		0.13	0.09	0	0.0733333	0	0	0.05	0.0166667	0.227273
Serpine1	CS		0.52	4.39	3.89	2.93333	1.4	14.49	16.21	10.7	3.64773		0.47	1.46	3.67	1.86667	0.1	0.44	1.21	0.583333	0.3125
Mx2	CS	Immunity	0.22	0.16	0.25	0.21	0.6	0.64	0.51	0.583333	2.77778		0.19	0.16	0.31	0.22	0.06	0.06	0.12	0.08	0.363636
Fbxo15	CS		0.01	0.22	0.11	0.113333	0.06	0.71	0.47	0.413333	3.64706		0.1	0.15	0.17	0.14	0	0.07	0.09	0.0533333	0.380952
Sdf2l1	CS	Stress	26.19	34.05	26.34	28.86	178	153.11	82.28	137.797	4.77466		37.3	34.39	33.38	35.0233	17.56	14.63	16.01	16.0667	0.458742
G0s2	CS	Apoptosis	1.19	3.01	2.55	2.25	9.92	25.14	11.11	15.39	6.84		0.35	0.24	0.16	0.25	0.12	0.15	0.09	0.12	0.48
Trim43c	CS		0.46	0.27	0.25	0.326667	2.67	0.83	0.49	1.33	4.07143		1.29	0.53	0.64	0.82	0	0.29	0.91	0.4	0.487805
Spdya	CS		1.13	1.06	0.78	0.99	2.7	3.48	1.93	2.70333	2.73064		1.71	1.12	1.19	1.34	0.78	0.96	0.75	0.83	0.619403
Hspa13	CS	Stress	7.88	8.43	7.95	8.08667	28.45	28.02	18.79	25.0867	3.10223		9.12	9.17	8.17	8.82	6.16	5.53	5.37	5.68667	0.644747
Hyou1	CS	Stress	79.24	45.92	35.12	53.4267	296.26	196.94	123.28	205.493	3.84627		36.24	48.48	43.39	42.7033	27.99	27.33	27.82	27.7133	0.648974
Mal	CS	Trafficking	0.13	0.03	0.02	0.06	0.27	0.24	0.32	0.276667	4.61111		0.51	0.26	0.43	0.4	0.3	0.24	0.25	0.263333	0.658333
Ficd	CS		1.6	1.17	1.47	1.41333	7.72	5.06	4.92	5.9	4.17453		1.4	1.39	1.51	1.43333	1.2	0.68	0.96	0.946667	0.660465
Rab39b	CS	Small GTPase	0	0	0.02	0.00666667	0.08	0.2	0.18	0.153333	23		0.02	0.01	0	0.01	0	0.01	0.01	0.00666667	0.666667
Ppp1r3f	CS		0.39	0.46	0.28	0.376667	0.61	1.46	0.82	0.963333	2.55752		0.35	0.38	0.71	0.48	0.25	0.34	0.38	0.323333	0.673611
Hspa5	CS	Stress	416.38	263.12	222.21	300.57	2808.88	1636.5	1165.73	1870.37	6.22274		248.9	259.68	252.92	253.833	179.58	170.11	183.18	177.623	0.699764
Hsp90b1	CS	Stress	305.61	299.6	209.82	271.677	1111.31	865.74	535.14	837.397	3.08233		255.68	265.01	281.5	267.397	199.94	208.75	216.2	208.297	0.77898
Stk32c	CS		0.11	0.06	0.01	0.06	0.19	0.13	0.15	0.156667	2.61111		0.12	0.09	0.45	0.22	0.16	0.07	0.29	0.173333	0.787879
Tspyl2	CS		1.2	1.34	0.97	1.17	6.5	5.35	4.64	5.49667	4.69801		1.9	2.19	2.1	2.06333	1.35	2.34	1.32	1.67	0.80937
Rcan1	CS		6.38	8.21	10.78	8.45667	18.38	20.99	94.22	44.53	5.26567		8.35	7.32	6.22	7.29667	7.38	5.5	5.47	6.11667	0.838282
Gsdma	CS		0.09	0.03	0	0.04	0.18	0.07	0.06	0.103333	2.58333		0.31	0.13	0.34	0.26	0.22	0.29	0.15	0.22	0.846154
Sorbs1	CS		2.24	2.21	4.57	3.00667	5.77	7.71	12.79	8.75667	2.91242		1.8	1.66	2.38	1.94667	2.4	1.44	1.18	1.67333	0.859589
Diras2	CS	Small GTPase	0.02	0.04	0.03	0.03	0.2	0.19	0.24	0.21	7		0.05	0.03	0.15	0.0766667	0.06	0.05	0.09	0.0666667	0.869565
Paqr3	CS	Small GTPase	0.27	0.34	0.25	0.286667	2.33	1.29	1.31	1.64333	5.73256		0.39	0.23	0.26	0.293333	0.23	0.21	0.34	0.26	0.886364
Anxa8	CS		0.06	0.01	0.01	0.0266667	0.24	0.08	0.03	0.116667	4.375		0.11	0.05	0.24	0.133333	0.05	0.03	0.28	0.12	0.9
Tmem39a	CS	autophagy	12.44	12.4	8.14	10.9933	52.91	50.82	34.12	45.95	4.17981		11.24	11.83	13.36	12.1433	9.55	11.56	12.36	11.1567	0.918748
Dnajc3	CS	Stress	27.7	22.66	22.01	24.1233	86.96	64.07	44.24	65.09	2.69822		22.01	23.68	22.21	22.6333	21.94	21.38	19.36	20.8933	0.923122
Dusp2	CS		0.19	0.12	0.25	0.186667	0.37	0.37	0.92	0.553333	2.96429		0.09	0.03	0.15	0.09	0.05	0.06	0.14	0.0833333	0.925926
Gem	CS	Small GTPase	0.37	0.76	0.32	0.483333	1.7	3.3	3.84	2.94667	6.09655		0.7	0.96	1.08	0.913333	0.5	1.09	1.01	0.866667	0.948905
Siah2	CS	wnt	12.69	11.76	8.87	11.1067	33.43	35.93	29.74	33.0333	2.97419		12.42	12.19	12.73	12.4467	10.92	12.92	11.67	11.8367	0.950991
Tmem198	CS	wnt	0.14	0.16	0.13	0.143333	0.46	0.49	0.6	0.516667	3.60465		0.22	0.27	0.15	0.213333	0.19	0.21	0.21	0.203333	0.953125
Cdkn2b	CS		35.34	32.29	43.95	37.1933	92.05	79.86	125.93	99.28	2.6693		50.18	47.56	44.05	47.2633	63.47	40.18	33.85	45.8333	0.969744
Golgb1	CS		0.24	0.12	0.11	0.156667	0.77	0.38	0.35	0.5	3.19149		0	0.24	0.58	0.273333	0.11	0.36	0.33	0.266667	0.97561
Ankrd54	CS		10.83	16.71	16.62	14.72	25.33	46.49	52.45	41.4233	2.81409		13.24	13.2	11.3	12.58	14.26	12.11	10.78	12.3833	0.984367			x
H47	CS	Stress	48.15	38.73	31.72	39.5333	141.35	127.93	82.92	117.4	2.96965		45.39	40.63	32.94	39.6533	42.6	38.11	37.85	39.52	0.996638
Dpcr1	CS		0.08	0.12	0.08	0.0933333	0.25	0.19	0.69	0.376667	4.03571		0.01	0.02	0.02	0.0166667	0.02	0	0.03	0.0166667	1
Ppp1r3c	CS		0.03	0.04	0.02	0.03	0.04	0.33	0.19	0.186667	6.22222		0.02	0.03	0.05	0.0333333	0.03	0.03	0.04	0.0333333	1
Efcab7	CS		0.54	0.88	0.74	0.72	1.81	3.8	2.17	2.59333	3.60185		0.93	0.95	0.75	0.876667	0.83	0.88	0.99	0.9	1.02662
Hax1	CS	Autophagy	47.03	46.23	36.55	43.27	132.36	154.07	102.4	129.61	2.99538		46.67	40.26	40.58	42.5033	44.63	45.46	41.34	43.81	1.03074
Nos2	CS		3	0.41	0.2	1.20333	15.17	1.03	0.78	5.66	4.7036		4.66	7.4	7.8	6.62	7.08	6.38	7.58	7.01333	1.05942
Derl3	CS	Stress	0.05	0.29	0.26	0.2	4.03	3.85	3.94	3.94	19.7		0.53	0.43	0.32	0.426667	0.43	0.62	0.31	0.453333	1.0625
Osgin1	CS	Apoptosis	37.13	12.9	20.96	23.6633	87.96	42.39	71.27	67.2067	2.84012		9.07	9.91	8.32	9.1	14.06	7.58	7.43	9.69	1.06484
Sel1l	CS	Stress	21.45	20	21.67	21.04	78.01	52.42	44.74	58.39	2.77519		18.63	20.48	17.5	18.87	22.98	19.87	18.86	20.57	1.09009
Kbtbd7	CS		2.99	3.15	2.79	2.97667	7.66	9	15.85	10.8367	3.64054		3.9	3.93	3.94	3.92333	3.89	4.66	4.47	4.34	1.1062
Fam13a	CS	Small GTPase	26.36	34.79	46.31	35.82	60.52	118.73	197.7	125.65	3.50782		15.37	19.77	20.22	18.4533	19.31	20.78	21.23	20.44	1.10766
Rsad2	CS		0.12	0.04	0.07	0.0766667	0.97	0.19	0.29	0.483333	6.30435		0.14	0.06	0.17	0.123333	0.09	0.15	0.17	0.136667	1.10811
Pde4dip	CS		20.11	15.18	14.15	16.48	53.4	53.49	47.84	51.5767	3.12965		14.26	19.63	20.96	18.2833	19.79	20.95	20.43	20.39	1.11522
Pram1	CS		0.16	0.09	0.12	0.123333	0.45	0.51	0.26	0.406667	3.2973		0.08	0.12	0.19	0.13	0.12	0.1	0.22	0.146667	1.12821
Otub2	CS		0.5	0.25	0.21	0.32	1.45	2	1.5	1.65	5.15625		0.31	0.34	0.4	0.35	0.31	0.36	0.53	0.4	1.14286
Lnx1	CS		11.99	14.04	9.84	11.9567	19.68	39.89	38.64	32.7367	2.73794		13.81	14.97	13.68	14.1533	16.38	18.55	13.96	16.2967	1.15144
Mtbp	CS		8.57	8.76	6.48	7.93667	18.74	26.19	17.18	20.7033	2.60857		8.12	8.59	8.89	8.53333	11.06	10.76	7.68	9.83333	1.15234
Hspb8	CS	Stress	0.01	0.06	0.07	0.0466667	0.03	0.28	0.29	0.2	4.28571		0.05	0	0.01	0.02	0	0.04	0.03	0.0233333	1.16667
Napb	CS		0.38	0.33	0.5	0.403333	1.48	2.41	1.73	1.87333	4.64463		0.32	0.28	0.34	0.313333	0.38	0.45	0.28	0.37	1.18085
Snx22	CS	Trafficking	0.42	0.3	0.28	0.333333	1.58	0.73	0.99	1.1	3.3		0.42	0.45	0.39	0.42	0.38	0.59	0.53	0.5	1.19048
Ip6k2	CS		10.24	13.97	15.01	13.0733	25.05	24.81	55.59	35.15	2.68868		13.22	15.41	16.33	14.9867	14.83	21.37	18.43	18.21	1.21508
Usp20	CS		4.81	4.5	3.66	4.32333	12.77	14.92	10.43	12.7067	2.93909		3.79	4.96	4.66	4.47	4.86	6.61	5	5.49	1.22819
Ptpn2	CS		18.84	19.84	14.01	17.5633	39.67	52.18	41.66	44.5033	2.53388		19.44	17.26	19.16	18.62	22.4	23.54	23	22.98	1.23416
Trim15	CS		8.23	4.95	8.31	7.16333	23.17	17.14	35.68	25.33	3.53606		5.79	4.39	8.16	6.11333	8.69	7.03	7.09	7.60333	1.24373
Rgs17	CS	GTPase activity regulation	0.01	0.03	0.07	0.0366667	0.04	0.09	0.21	0.113333	3.09091		0.01	0.02	0.01	0.0133333	0.02	0.02	0.01	0.0166667	1.25
Stx5a	CS	Trafficking	21.9	27.32	24.79	24.67	58.88	70.36	62.48	63.9067	2.59046		30.57	26.88	27.16	28.2033	39.15	39.19	29.34	35.8933	1.27266
Usp36	CS		13.63	7.48	6.95	9.35333	34.22	29.57	27.03	30.2733	3.23664		7.31	10.64	8.37	8.77333	11.2	11.7	10.6	11.1667	1.2728
AK129341	CS		0.01	0.05	0.01	0.0233333	0.05	0.16	0.18	0.13	5.57143		0.08	0.04	0.06	0.06	0.09	0.1	0.04	0.0766667	1.27778
Mtm1	CS	Trafficking	13.53	14.74	11.02	13.0967	50.52	51	35.97	45.83	3.49936		14.78	14.03	15.75	14.8533	20.04	19.37	17.7	19.0367	1.28164
Pkia	CS		0.07	0.04	0.03	0.0466667	0.06	0.14	0.16	0.12	2.57143		0.13	0.08	0.14	0.116667	0.23	0.09	0.13	0.15	1.28571
Trim17	CS		0.07	0.11	0.06	0.08	0.15	0.38	0.53	0.353333	4.41667		0.05	0.05	0.14	0.08	0.06	0.11	0.14	0.103333	1.29167
Tlk2	CS	Autophagy	10.74	10.53	7.68	9.65	23.4	34.14	22.91	26.8167	2.77893		9.63	10.81	11.93	10.79	13.1	15.58	13.76	14.1467	1.31109
Snx33	CS	Trafficking	0.99	0.65	0.57	0.736667	2.67	1.33	1.54	1.84667	2.50679		1.17	1.21	1.41	1.26333	1.44	1.61	1.92	1.65667	1.31135
Ifitm1	CS	Immunity	0.09	0.04	0	0.0433333	0.66	0.17	0.21	0.346667	8		0	0.11	0.27	0.126667	0.08	0.29	0.13	0.166667	1.31579
Nedd9	CS		21.29	22.11	25.71	23.0367	37.9	55.37	82.83	58.7	2.54811		31.97	39.16	32.72	34.6167	38.41	50.32	48.61	45.78	1.32248
Ptprr	CS		3.82	2.1	4.36	3.42667	8.42	6.53	16.18	10.3767	3.02821		5.23	4.01	6.51	5.25	9.89	5.32	5.69	6.96667	1.32698
Eprs	CS		72.1	46.35	36.8	51.75	164.8	123.85	101.98	130.21	2.51614		38.69	47.18	48.83	44.9	57.69	61.99	60.66	60.1133	1.33883
Syvn1	CS	Stress	17.79	14.97	14.85	15.87	97.05	49.25	50.13	65.4767	4.12581		16.87	20.23	14.44	17.18	28.19	22.84	18.44	23.1567	1.34789
Ptp4a1	CS		58.68	61.55	56.63	58.9533	173.22	207.29	231.87	204.127	3.46251		67.85	55.24	61.99	61.6933	78.66	96.79	75.2	83.55	1.35428
Rin1	CS	Trafficking	7.74	5.2	3.48	5.47333	21.09	13.99	12.87	15.9833	2.92022		3.7	2.93	4.79	3.80667	5.16	4.83	5.63	5.20667	1.36778
Rasgef1b	CS	Small GTPase	0.73	2.2	1.33	1.42	2.9	4.07	14.78	7.25	5.10563		1.55	1.53	2.11	1.73	1.93	2.58	2.61	2.37333	1.37187
Psph	CS		18.69	16.67	11.68	15.68	79.46	87.31	43.76	70.1767	4.47555		19.95	19.48	14.44	17.9567	25.77	27.64	20.5	24.6367	1.37201
Socs2	CS		19.89	21.45	22.3	21.2133	55.43	68.23	69.19	64.2833	3.03033		28.92	25.8	21.8	25.5067	41.18	37.63	26.81	35.2067	1.38029
Ap3b2	CS	Trafficking	0.29	0.2	0.21	0.233333	0.71	0.36	0.69	0.586667	2.51429		0.19	0.16	0.14	0.163333	0.25	0.13	0.3	0.226667	1.38776
Dnajb9	CS	Stress	18.22	17.11	17.25	17.5267	119.65	101.1	106.07	108.94	6.21567		20.92	17.29	15.01	17.74	30.57	23.23	20.06	24.62	1.38782
Arhgap23	CS	Small GTPase	0.05	0.07	0.03	0.05	0.11	0.2	0.13	0.146667	2.93333		0.06	0.07	0.05	0.06	0.06	0.13	0.06	0.0833333	1.38889
Herpud1	CS	Stress	74.05	60.26	66.28	66.8633	850.3	537.38	661.1	682.927	10.2138		66.25	54.46	52.14	57.6167	98.15	82.76	61.9	80.9367	1.40474
Letm2	CS		0.41	0.98	0.91	0.766667	1.23	3.18	2.98	2.46333	3.21304		0.78	0.71	1.05	0.846667	1.08	1.31	1.2	1.19667	1.41339
Fam129a	CS	Stress	4.04	4.85	0.95	3.28	22.64	16.47	7.01	15.3733	4.68699		1.58	1.05	1.24	1.29	1.6	1.69	2.18	1.82333	1.41344
Fyn	CS		0.1	0.17	0.25	0.173333	0.57	0.57	0.71	0.616667	3.55769		0.11	0.12	0.13	0.12	0.18	0.17	0.16	0.17	1.41667
Ankrd10	CS	wnt	22.26	23.14	20.39	21.93	52.32	67.78	50.28	56.7933	2.58976		25.2	27.96	26.14	26.4333	36.44	43.89	33.67	38	1.43758
March5	CS		43.46	34.84	32.17	36.8233	110.96	112.21	93.54	105.57	2.86693		45.01	39.22	38.47	40.9	66.01	61.22	50.35	59.1933	1.44727
Snx16	CS	Trafficking	2	1.78	2.2	1.99333	3.53	4.83	6.64	5	2.50836		2.37	2.16	2.38	2.30333	3.48	3.51	3.28	3.42333	1.48625
Pak3	CS		0.03	0.2	0.1	0.11	0.11	0.4	0.44	0.316667	2.87879		0.04	0.03	0.01	0.0266667	0.04	0.05	0.03	0.04	1.5
Rasip1	CS	Autophagy	0.05	0.03	0.02	0.0333333	0.21	0.36	0.2	0.256667	7.7		0.02	0.03	0.03	0.0266667	0.02	0.03	0.07	0.04	1.5
Arl4a	CS	Small GTPase	15.81	11.56	14.86	14.0767	39.64	46.3	76.72	54.22	3.85176		13.37	12.91	13.44	13.24	18.31	24.71	17.67	20.23	1.52795
Gadd45a	CS		42.84	35.95	27.54	35.4433	160.21	181.32	165.92	169.15	4.77241		26.28	22.34	28.76	25.7933	34.15	48.52	35.76	39.4767	1.5305
Adcy4	CS		0.08	0.07	0.19	0.113333	0.37	0.19	0.39	0.316667	2.79412		0.09	0.09	0.08	0.0866667	0.08	0.2	0.12	0.133333	1.53846
Mtus1	CS		19.99	16.84	13.79	16.8733	51.63	50.43	40.72	47.5933	2.82062		19.99	24.99	23.31	22.7633	33.17	41.34	31.64	35.3833	1.5544
Plk3	CS	Stress	15.08	3.13	3.7	7.30333	46.09	16.22	41.23	34.5133	4.7257		3.87	3.9	4.15	3.97333	5.57	8.18	4.9	6.21667	1.5646
Rhof	CS	Small GTPase	10.8	3.27	3.43	5.83333	52.46	18.3	26.36	32.3733	5.54971		6.08	6.02	5.05	5.71667	10.41	8.62	8.06	9.03	1.57959
Trim43a	CS		0	0.06	0.18	0.08	0.8	0.28	0.34	0.473333	5.91667		0.67	0.12	0.45	0.413333	0.69	0.27	1	0.653333	1.58065
Cidec	CS	apoptosis	12.42	7.15	11.24	10.27	42.85	21.14	42.09	35.36	3.44304		7.49	3.91	3.84	5.08	11.75	6.25	6.13	8.04333	1.58333
Fam134b	CS	Autophagy	6.41	12.66	16.73	11.9333	15.16	31.22	90.99	45.79	3.83715		5.98	3.87	3.67	4.50667	9.32	6.75	5.34	7.13667	1.58358
Stk17b	CS	apoptosis	26.65	30.84	24.1	27.1967	39.71	91.89	80.85	70.8167	2.60387		30.28	33.72	31.54	31.8467	50.18	61.11	46.97	52.7533	1.65648
Trp53inp1	CS	autophagy	5.92	6.88	6.9	6.56667	11.84	18.36	30.6	20.2667	3.08629		6.7	6.05	7.2	6.65	13.88	10.39	8.96	11.0767	1.66566
Rab2b	CS	Small GTPase	1.53	1.04	1.03	1.2	3.13	3.28	3.57	3.32667	2.77222		1.21	1.2	1.05	1.15333	1.74	2.32	1.73	1.93	1.67341
Rassf1	CS		16.91	15.53	14.44	15.6267	45.1	61.69	57.98	54.9233	3.51472		17.19	19.7	20.86	19.25	29.04	40.17	33.83	34.3467	1.78424
Rnf24	CS		0.51	0.26	0.47	0.413333	1.7	0.92	0.94	1.18667	2.87097		0.57	0.64	0.75	0.653333	0.91	1.26	1.33	1.16667	1.78571
Zdhhc17	CS	Trafficking	4.23	2.29	2.73	3.08333	7.53	8.95	7.4	7.96	2.58162		2.91	3.54	3.32	3.25667	5.33	6.5	5.73	5.85333	1.79734
Cnksr3	CS		5.49	5.12	5.8	5.47	14.07	18.39	22.67	18.3767	3.35954		4.93	4.92	4.62	4.82333	9.89	9.91	7.42	9.07333	1.88113
Arrdc4	CS	Trafficking	26.86	30.27	30.6	29.2433	42.46	86.44	95.41	74.77	2.55682		24.46	20.99	22.32	22.59	59.17	40.27	28.35	42.5967	1.88564
Grb10	CS	wnt	0.98	0.22	0.33	0.51	2.61	1.27	1.2	1.69333	3.32026		0.27	0.26	0.19	0.24	0.43	0.48	0.45	0.453333	1.88889
Sh3tc1	CS		4.33	2.63	4.9	3.95333	8.2	9.18	16.06	11.1467	2.81956		2.42	2.54	1.16	2.04	5.99	3.54	2.37	3.96667	1.94444
Chac1	CS	Stress	29.36	8.57	9.23	15.72	229.91	222.08	251.23	234.407	14.9114		9.11	11.66	11.22	10.6633	22.35	22.29	17.63	20.7567	1.94655
Ptpn22	CS		1.4	0.22	0.28	0.633333	6.72	2.02	2.02	3.58667	5.66316		1.94	1.84	0.96	1.58	3.47	3.93	1.95	3.11667	1.97257
Rnd1	CS	Small GTPase	0.15	0.08	0.09	0.106667	1.54	0.75	0.62	0.97	9.09375		0.06	0.13	0.14	0.11	0.2	0.23	0.24	0.223333	2.0303
Vav3	CS	Small GTPase	2.18	3.63	4.63	3.48	5.78	19.8	12.05	12.5433	3.60441		8.51	9.65	8.08	8.74667	16.61	22.05	15.36	18.0067	2.05869
Ppp1r15a	CS	Stress	10.11	7.9	6.1	8.03667	101.13	78.56	89.6	89.7633	11.1692		6.04	5.85	5.56	5.81667	10.11	16.05	10.56	12.24	2.1043
Tifa	CS		8.35	4.18	1.96	4.83	16.32	14.52	8.31	13.05	2.70186		20.29	20.44	23.71	21.48	41.85	50.07	45.67	45.8633	2.13516
March3	CS		0.04	0.08	0.08	0.0666667	0.46	0.27	0.23	0.32	4.8		0.1	0.1	0.08	0.0933333	0.25	0.21	0.15	0.203333	2.17857
Rab30	CS	Small GTPase	9.95	4	12.55	8.83333	22.73	13.73	65.93	34.13	3.86377		8.81	4.2	2.24	5.08333	17.37	11.32	6.23	11.64	2.28984
Cables1	CS	apoptosis	3.31	4.77	4.32	4.13333	9.37	12.74	18.26	13.4567	3.25565		5.43	5.4	4.39	5.07333	13.31	12.18	9.47	11.6533	2.29698
Fam13b	CS	Small GTPase	9.79	5.95	9.52	8.42	18.68	22.72	31.1	24.1667	2.87015		8.26	9.42	7.43	8.37	23.4	19.03	15.33	19.2533	2.30028
Tspyl5	CS		0.03	0.05	0.03	0.0366667	0.13	0.42	0.17	0.24	6.54545		0.07	0.11	0.11	0.0966667	0.1	0.3	0.27	0.223333	2.31034
Casp4	CS	apoptosis	15.23	14.55	14.23	14.67	49.03	55.09	57.97	54.03	3.68303		14.95	9.72	14.23	12.9667	26.9	30.88	32.91	30.23	2.33136
Trib3	CS	Stress	52.44	23.26	20.93	32.21	345.78	309.19	277.03	310.667	9.64504		15.51	12.98	8.84	12.4433	38.58	28.77	21.38	29.5767	2.37691
Necab3	CS		0.11	0.09	0.09	0.0966667	0.21	0.45	0.19	0.283333	2.93103		0.05	0.08	0.23	0.12	0.16	0.28	0.42	0.286667	2.38889
Pmaip1	CS	Apoptosis	18.4	20.15	16.75	18.4333	37.29	64.61	56.02	52.64	2.8557		18.41	19.14	25.77	21.1067	36.32	75.35	44.01	51.8933	2.45862
Stk32a	CS		0.04	0.02	0.01	0.0233333	0.09	0.09	0.38	0.186667	8		0.01	0	0.01	0.00666667	0.03	0.01	0.01	0.0166667	2.5
Jub	CS	apoptosis	1.98	2.75	1.65	2.12667	4.35	5.03	3.49	4.29	2.01724		3.21	3.28	4.18	3.55667	7.37	8.89	10.42	8.89333	2.50047
Pik3ap1	CS		1.6	0.34	0.16	0.7	3.07	1.04	0.28	1.46333	2.09048		2.41	3.79	2.43	2.87667	5.4	7.65	8.57	7.20667	2.50521
Sqstm1	CS	autophagy	96.29	73.55	74.44	81.4267	300.45	209.07	281.41	263.643	3.2378		62.51	67.52	57.11	62.38	150.44	183.19	135.92	156.517	2.50908
Dock2	CS	Small GTPase	0.2	0.02	0.37	0.196667	0.18	0.04	0.36	0.193333	0.983051		0.05	0.04	0.04	0.0433333	0.14	0.07	0.12	0.11	2.53846
Plekhg3	CS		9.74	9.34	5.98	8.35333	14.9	18.85	17.58	17.11	2.04828		7.61	10.65	11.69	9.98333	20.54	31.34	25.09	25.6567	2.56995
Rnd3	CS	Small GTPase	10.71	12.02	10.75	11.16	14.6	27.3	27.65	23.1833	2.07736		13.13	12.53	15.35	13.67	27.11	45.43	33.48	35.34	2.58522
Pdzrn3	CS		0.5	0.37	0.44	0.436667	0.46	0.52	0.66	0.546667	1.25191		0.36	0.34	0.37	0.356667	0.7	1.14	0.93	0.923333	2.58879
Ifrd1	CS	Stress	17.23	13.93	13.75	14.97	63.22	54.84	62.75	60.27	4.02605		18.28	16.4	18.1	17.5933	47.2	53.62	36.03	45.6167	2.59284
Pag1	CS		1.98	3.3	3.03	2.77	2.94	3.95	3.54	3.47667	1.25511		1.65	2.35	2.38	2.12667	5.19	5.69	5.73	5.53667	2.60345
Dnajb7	CS		0.43	0.6	0.36	0.463333	0.57	0.8	0.57	0.646667	1.39568		0.45	0.41	0.46	0.44	0.82	1.13	1.5	1.15	2.61364
Ccdc120	CS		2.53	2.4	2.88	2.60333	4.1	5.12	7	5.40667	2.07682		3.65	3.16	2.88	3.23	8.87	10	6.89	8.58667	2.65841
E030030I06Rik	CS		8.5	6.99	3.48	6.32333	15.26	18.46	11.55	15.09	2.3864		3.7	5.47	5.45	4.87333	11.71	12.63	14.64	12.9933	2.66621
Pik3c2g	CS		0.02	0.01	0.02	0.0166667	0.02	0.17	0.15	0.113333	6.8		0	0.01	0.02	0.01	0.03	0.04	0.01	0.0266667	2.66667
Ddit3	CS	Stress	68.56	30.02	26.62	41.7333	585.38	251.23	289.01	375.207	8.99058		14.81	16.97	21.24	17.6733	56	49.79	37.44	47.7433	2.70143
Agtpbp1	CS		0.36	0.44	0.56	0.453333	1.71	2.03	2.14	1.96	4.32353		0.36	0.58	0.54	0.493333	1.72	1.17	1.11	1.33333	2.7027
Rasgef1a	CS	Small GTPase	0.01	0.03	0.03	0.0233333	0.01	0.02	0.02	0.0166667	0.714286		0.02	0.04	0.11	0.0566667	0.04	0.21	0.21	0.153333	2.70588
Psd	CS	GTPase activity regulation	0.38	0.38	0.35	0.37	1.04	0.68	1.11	0.943333	2.54955		0.31	0.42	0.44	0.39	0.91	1.06	1.2	1.05667	2.7094
Pclo	CS	Trafficking	0.1	0.05	0.08	0.0766667	0.14	0.07	0.11	0.106667	1.3913		0.02	0.08	0.05	0.05	0.12	0.16	0.13	0.136667	2.73333
Rasl10a	CS	Small GTPase	0	0.06	0.01	0.0233333	0.02	0.03	0.03	0.0266667	1.14286		0.11	0.02	0.05	0.06	0.16	0.2	0.14	0.166667	2.77778
Tssk1	CS		0.17	0.1	0.21	0.16	0.19	0.18	0.27	0.213333	1.33333		0.16	0.27	0.07	0.166667	0.34	0.44	0.63	0.47	2.82
Serpina1a	CS		0.11	0.23	0.24	0.193333	0	0.12	0.14	0.0866667	0.448276		0.24	0.15	0.18	0.19	0.24	0.48	0.93	0.55	2.89474
Trim46	CS		1.48	1.75	1.6	1.61	20.4	10.13	9.59	13.3733	8.30642		0.26	0.3	0.59	0.383333	0.85	1.29	1.2	1.11333	2.90435
Dusp1	CS	phosphatase	3.87	3.43	3.35	3.55	6.94	6.28	13.26	8.82667	2.48638		2.79	3.71	4.86	3.78667	6.03	16.22	11.21	11.1533	2.94542
Pde10a	CS	phosphatase	0.01	0.02	0.03	0.02	0.07	0.13	0.27	0.156667	7.83333		0	0	0.01	0.00333333	0.02	0	0.01	0.01	3
Fbxo32	CS		0.06	0.41	0.22	0.23	0.12	0.28	0.5	0.3	1.30435		1.47	1.87	1.8	1.71333	5.72	5.04	4.94	5.23333	3.05447
Inpp4b	CS	phosphatase	0.17	0.35	0.22	0.246667	0.16	0.44	0.25	0.283333	1.14865		0.12	0.16	0.19	0.156667	0.42	0.48	0.55	0.483333	3.08511
Tmem88	CS	wnt	0.02	0.06	0.04	0.04	0.34	0.18	0.46	0.326667	8.16667		0.03	0.06	0.02	0.0366667	0.13	0.2	0.03	0.12	3.27273
Dusp8	CS	phosphatase	4.08	1.98	2.49	2.85	10.89	9.08	16.64	12.2033	4.28187		2.54	2.85	2.74	2.71	7.02	12.82	7.27	9.03667	3.33456
Apcdd1	CS	wnt	0.73	0.46	0.47	0.553333	0.47	0.32	0.17	0.32	0.578313		1.25	1.48	1.13	1.28667	3.02	5.46	4.42	4.3	3.34197
Rasgrp3	CS	GTPase activity regulation	0.01	0	0.01	0.00666667	0.06	0.02	0.01	0.03	4.5		0.05	0.02	0.03	0.0333333	0.17	0.11	0.09	0.123333	3.7
Rnf39	CS		1.44	0.88	1.05	1.12333	2.3	2.55	2.06	2.30333	2.05045		2.19	1.44	1.9	1.84333	6.41	8.78	5.56	6.91667	3.75226
Arl9	CS	Small GTPase	0.03	0.13	0.2	0.12	0.19	0.62	0.59	0.466667	3.88889		0	0	0.07	0.0233333	0	0.2	0.07	0.09	3.85714
Sh2d4b	CS		0.02	0.03	0.01	0.02	0.17	0.09	0.05	0.103333	5.16667		0.08	0	0.02	0.0333333	0.09	0.09	0.21	0.13	3.9
Serpinb6c	CS		0	0	0	0	0.05	0.12	0.04	0.07	#DIV/0!		0	0.05	0.09	0.0466667	0.03	0.44	0.11	0.193333	4.14286
Stx11	CS	Trafficking	0.03	0.06	0.08	0.0566667	0.08	0.19	0.13	0.133333	2.35294		0.09	0.07	0.14	0.1	0.17	0.63	0.53	0.443333	4.43333
Txk	CS		0	0.05	0.2	0.0833333	0.19	0.42	0.75	0.453333	5.44		0.01	0.01	0	0.00666667	0.02	0.06	0.01	0.03	4.5
Agr3	CS		0.83	1.77	1.24	1.28	0.78	1.15	1.31	1.08	0.84375		1.32	2.34	1.04	1.56667	4.38	9.51	7.9	7.26333	4.63617
Fbxl22	CS		0.16	0.11	0.11	0.126667	0.37	0.41	0.44	0.406667	3.21053		0.16	0.18	0.05	0.13	0.69	0.79	0.67	0.716667	5.51282
Rrad	CS	Small GTPase	0.03	0.01	0	0.0133333	0.14	0.12	0.07	0.11	8.25		0.06	0.07	0.17	0.1	0.39	0.7	0.89	0.66	6.6
Gm3150	CS		5.77	3.42	3.95	4.38	7.06	3.77	6.89	5.90667	1.34855		1.79	0	0	0.596667	5.49	5.39	5.71	5.53	9.26816
Dnajb13	CS		0.02	0.1	0.12	0.08	0.02	0.02	0.04	0.0266667	0.333333		0.02	0.02	0	0.0133333	0.27	0.15	0.1	0.173333	13
Abcg4	CT		0.03	0.03	0.02	0.0266667	0.18	0.09	0.14	0.136667	5.125		0.01	0.04	0.04	0.03	0	0.01	0.02	0.01	0.333333
Xkrx	CT		0.09	0.09	0.08	0.0866667	0.12	0.3	0.31	0.243333	2.80769		0.14	0.2	0.09	0.143333	0.07	0.06	0.13	0.0866667	0.604651
Slc34a2	CT		19.53	1.9	7.65	9.69333	27.74	10.36	39.11	25.7367	2.65509		22.65	25.91	13.6	20.72	23.82	8.13	6.08	12.6767	0.611808
Slco1c1	CT		0.07	0.02	0.06	0.05	0.02	0.14	0.22	0.126667	2.53333		0.04	0.03	0.05	0.04	0.06	0.02	0	0.0266667	0.666667
Slc19a3	CT		0.19	0.06	0.21	0.153333	0.37	0.28	0.55	0.4	2.6087		0.02	0.01	0	0.01	0.01	0	0.01	0.00666667	0.666667
Svop	CT		0.14	0.23	0.31	0.226667	0.3	0.62	1.23	0.716667	3.16176		0.2	0.08	0.12	0.133333	0.15	0.06	0.07	0.0933333	0.7
Fxyd5	CT		0.05	0.1	0.02	0.0566667	0.21	0.18	0.23	0.206667	3.64706		0.04	0.08	0.09	0.07	0.04	0.02	0.09	0.05	0.714286
Slc35e4	CT		0.63	0.7	0.42	0.583333	2.89	1.94	1.82	2.21667	3.8		1.08	1.04	1.36	1.16	1	0.89	1.31	1.06667	0.91954
Catsper2	CT		0.45	0.3	0.36	0.37	1.23	2.78	1.61	1.87333	5.06306		0.38	0.41	0.42	0.403333	0.3	0.38	0.47	0.383333	0.950413
Slc6a14	CT		0.1	0.01	0.01	0.04	0.32	0	0	0.106667	2.66667		2.37	0.28	0.15	0.933333	2.31	0.21	0.26	0.926667	0.992857
Gm5868	CT		0.08	0	0	0.0266667	0.18	0.19	0.39	0.253333	9.5		0.06	0	0	0.02	0	0	0.06	0.02	1
Dnd1	CT		0.34	0.29	0.23	0.286667	0.87	0.79	0.81	0.823333	2.87209		0.32	0.46	0.3	0.36	0.29	0.47	0.46	0.406667	1.12963
Slc25a33	CT		13.35	8.54	5.71	9.2	40.19	36.43	29.57	35.3967	3.84746		6.85	6.69	6.95	6.83	7.95	8.09	7.41	7.81667	1.14446
Guca1b	CT		0.21	0.2	0.22	0.21	0.86	0.95	0.57	0.793333	3.77778		0.1	0.17	0.34	0.203333	0.18	0.2	0.32	0.233333	1.14754
Mmp23	CT		0.46	0.41	0.66	0.51	2.28	1.23	1.77	1.76	3.45098		0.82	0.54	0.6	0.653333	1.05	0.41	1	0.82	1.2551
Kcnk5	CT		26.13	20.52	23.75	23.4667	54.98	43.72	87.74	62.1467	2.6483		16.34	16.63	12.2	15.0567	27.63	16.44	13.34	19.1367	1.27098
Slc3a2	CT		91.92	49.69	62.31	67.9733	260.35	234.67	248.9	247.973	3.6481		56.1	50.71	46.05	50.9533	93	72.46	55.73	73.73	1.44701
Clic4	CT		12.81	11.98	8.22	11.0033	44.92	42.52	26.79	38.0767	3.46047		11.94	11.89	11.24	11.69	16.32	18.42	16.26	17	1.45423
Clca5	CT		0.01	0.03	0.07	0.0366667	0.11	0.13	0.23	0.156667	4.27273		0.05	0.05	0.02	0.04	0.13	0.02	0.03	0.06	1.5
Slc7a5	CT		27.31	19.67	14.74	20.5733	98.5	96.97	69.38	88.2833	4.29115		23.23	23.91	19.11	22.0833	42.21	34.08	24.86	33.7167	1.52679
Abca8b	CT		0.93	0.15	0.17	0.416667	1.62	0.94	1.05	1.20333	2.888		1.46	1.3	1.65	1.47	3.27	2.03	1.5	2.26667	1.54195
Ttyh1	CT		0.84	0.83	1.1	0.923333	4.37	3.68	9.49	5.84667	6.33213		0.58	0.35	0.47	0.466667	0.88	0.59	0.7	0.723333	1.55
Efha2	CT		0.4	0.33	0.3	0.343333	0.84	1.32	0.78	0.98	2.85437		0.2	0.28	0.23	0.236667	0.26	0.42	0.44	0.373333	1.57746
Cnnm1	CT		1.05	1.67	1.32	1.34667	1.19	5.62	4.79	3.86667	2.87129		0.64	0.52	0.56	0.573333	1.31	0.92	0.73	0.986667	1.72093
Slc14a1	CT		0.07	0.13	0.04	0.08	0.18	0.76	0.19	0.376667	4.70833		0.1	0.17	0.13	0.133333	0.04	0.43	0.25	0.24	1.8
Slc10a2	CT		0.75	0.16	0.18	0.363333	2.79	1.15	1.58	1.84	5.06422		17.24	13.31	21.8	17.45	46.88	21.61	28.39	32.2933	1.85062
Atp2b1	CT		30.75	23.36	29.67	27.9267	137.15	89.12	168.83	131.7	4.71592		23.44	26.88	27.06	25.7933	50.28	48.32	46.03	48.21	1.86909
Slc7a1	CT		35.32	23.08	18.74	25.7133	110.14	82.88	71.03	88.0167	3.423		19.38	27.06	24.54	23.66	50.81	49.16	35.23	45.0667	1.90476
Slc16a7	CT		0.07	0.04	0.04	0.05	0.21	0.43	0.21	0.283333	5.66667		0.2	0.16	0.15	0.17	0.22	0.46	0.3	0.326667	1.92157
Trpc1	CT		0.12	0.14	0.22	0.16	0.33	0.49	0.39	0.403333	2.52083		0.16	0.16	0.26	0.193333	0.26	0.47	0.42	0.383333	1.98276
Slc38a2	CT		50.25	37.82	40.47	42.8467	125.04	108.37	118.03	117.147	2.73409		43.04	53.5	44.24	46.9267	96.9	109.21	76.07	94.06	2.0044
Slc6a9	CT		25.24	15.71	13.46	18.1367	67.01	52.66	38.53	52.7333	2.90755		13.97	17.97	11.42	14.4533	35.61	33.49	18.3	29.1333	2.01568
Slc30a1	CT		14.74	8.46	11.97	11.7233	28.39	33	46.71	36.0333	3.07364		9.12	7.89	6.99	8	19.98	21.33	13.71	18.34	2.2925
Slc17a8	CT		0.14	0.04	0.03	0.07	1.29	0.97	0.72	0.993333	14.1905		0.13	0.2	0.58	0.303333	0.56	0.78	0.83	0.723333	2.38462
Trpm6	CT		0.19	0.06	0.1	0.116667	6.96	8.75	13.97	9.89333	84.8		0.36	0.36	0.3	0.34	1.54	0.59	0.35	0.826667	2.43137
Itprip	CT		0.18	0.54	0.29	0.336667	0.89	2.49	1.46	1.61333	4.79208		0.75	0.62	0.95	0.773333	0.95	2.66	2.14	1.91667	2.47845
Xk	CT		0.85	1.55	1.49	1.29667	0.9	1.54	1.26	1.23333	0.951157		1.97	2.19	1.78	1.98	3.65	6.95	4.4	5	2.52525
Kcnip4	CT		0.04	0.1	0.03	0.0566667	0.06	0.07	0.05	0.06	1.05882		0.08	0.07	0.03	0.06	0.24	0.13	0.14	0.17	2.83333
Slc7a3	CT		0.16	0.22	0.06	0.146667	1.48	1.6	1.12	1.4	9.54545		0.14	0.08	0.07	0.0966667	0.35	0.27	0.27	0.296667	3.06897
Klhl24	CT		0.49	6.98	3.91	3.79333	0.26	4.01	4.71	2.99333	0.789104		5.39	8	7.71	7.03333	22.06	26.25	18.97	22.4267	3.18863
Kcnd1	CT		0.06	0.06	0.08	0.0666667	0.22	0.24	0.41	0.29	4.35		0.04	0.05	0.07	0.0533333	0.12	0.21	0.23	0.186667	3.5
Enkur	CT		0.04	0.04	0	0.0266667	0.1	0.09	0.1	0.0966667	3.625		0.04	0.02	0.09	0.05	0.19	0.14	0.24	0.19	3.8
Abca12	CT		0.07	0.07	0.01	0.05	0.69	0.25	0.26	0.4	8		0.06	0.06	0.07	0.0633333	0.21	0.29	0.23	0.243333	3.84211
Slc16a8	CT		0.13	0.03	0.09	0.0833333	0.35	0.17	0.15	0.223333	2.68		0.05	0.12	0.03	0.0666667	0.15	0.24	0.45	0.28	4.2
Slc7a11	CT		2.88	0.98	0.69	1.51667	29.25	28.53	25.3	27.6933	18.2593		0.73	1.24	1.05	1.00667	8.33	10.98	6.37	8.56	8.50331
Aqp8	CT		0.01	0.1	1.16	0.423333	0.07	0.17	0.72	0.32	0.755906		0	0.04	0	0.0133333	0.27	0.83	0.16	0.42	31.5
Aqp9	CT		0.02	0.01	0.03	0.02	0.05	0.06	0.22	0.11	5.5		0	0	0	0	0	0.08	0.11	0.0633333	#DIV/0!
Ttll2	CytS		0.07	0.17	0.33	0.19	0.11	0.46	0.91	0.493333	2.59649		0.13	0.1	0.03	0.0866667	0.02	0	0.03	0.0166667	0.192308
Abpa	CytS		0.07	0	0.06	0.0433333	0.36	0	0.06	0.14	3.23077		0.44	0.2	0.16	0.266667	0.07	0.22	0	0.0966667	0.3625
Synpo	CytS		10.18	2.49	6.78	6.48333	19.41	6.32	28.26	17.9967	2.77584		6.11	4.54	3.22	4.62333	6.01	1.86	1.59	3.15333	0.682048
Plek	CytS		1.09	0.39	1.67	1.05	7.83	1.69	5.88	5.13333	4.88889		0.48	0.22	0.18	0.293333	0.29	0.19	0.25	0.243333	0.829545
Cap2	CytS		0.08	0.33	0.1	0.17	0.55	1.79	0.34	0.893333	5.2549		0.38	0.3	0.4	0.36	0.13	0.39	0.4	0.306667	0.851852
Nhs	CytS		0.37	0.96	0.38	0.57	1.33	3.58	1.48	2.13	3.73684		0.27	0.73	0.9	0.633333	0.38	0.91	0.71	0.666667	1.05263
Kifc3	CytS		10.78	16.9	13.36	13.68	25.57	40.28	38.26	34.7033	2.53679		10.84	9.88	15	11.9067	14.25	9.8	15.48	13.1767	1.10666
Fmnl1	CytS		0.42	0.16	0.28	0.286667	2.05	2.67	2.89	2.53667	8.84884		0.13	0.15	0.17	0.15	0.23	0.19	0.09	0.17	1.13333
Ank3	CytS		1.77	2.71	3.3	2.59333	12.61	9.81	21.46	14.6267	5.6401		2.24	2.13	3.45	2.60667	3.22	3.11	3.25	3.19333	1.22506
Tppp3	CytS		0.36	0.33	0.18	0.29	2.72	1.31	0.95	1.66	5.72414		0.26	0.07	0.13	0.153333	0.2	0.19	0.2	0.196667	1.28261
Myom1	CytS		0.09	0.07	0.1	0.0866667	0.22	0.42	0.25	0.296667	3.42308		0.12	0.19	0.26	0.19	0.14	0.25	0.38	0.256667	1.35088
Krt12	CytS		0.06	0.02	0.09	0.0566667	0.16	0.04	0.42	0.206667	3.64706		0.16	0.08	0.06	0.1	0.18	0.14	0.16	0.16	1.6
Ndel1	CytS		17.91	16.55	19.69	18.05	42.36	40.6	58.54	47.1667	2.61311		13.86	14.07	13.64	13.8567	25.69	28.93	21.58	25.4	1.83305
Sprr1a	CytS		17.52	10.06	16.7	14.76	66.82	38.28	65.6	56.9	3.85501		35.06	20.94	30.05	28.6833	42.93	65.91	55.12	54.6533	1.9054
Rai14	CytS		4.72	5.59	3.84	4.71667	11.45	18.06	11.54	13.6833	2.90106		4.75	5.96	6.34	5.68333	9.55	12.7	12.04	11.43	2.01114
Ttll7	CytS		0.21	0.15	0.23	0.196667	0.61	0.59	0.57	0.59	3		0.17	0.17	0.13	0.156667	0.29	0.52	0.3	0.37	2.3617
Spnb1	CytS		0.34	0.16	0.42	0.306667	0.34	0.19	0.34	0.29	0.945652		0.12	0.18	0.18	0.16	0.43	0.55	0.33	0.436667	2.72917
Kif26b	CytS		0.06	0.08	0.1	0.08	0.04	0.1	0.07	0.07	0.875		0.28	0.7	0.54	0.506667	0.57	2.07	1.54	1.39333	2.75
Myl4	CytS		0	0	0.05	0.0166667	0.03	0.04	0.07	0.0466667	2.8		0.08	0.03	0.09	0.0666667	0.26	0.23	0.06	0.183333	2.75
Cobll1	CytS		8.8	6.41	5.78	6.99667	16.72	14.99	15.6	15.77	2.25393		6.01	7.15	5.94	6.36667	14.59	21.65	17.11	17.7833	2.79319
Krt4	CytS		0.09	0.02	0	0.0366667	0.85	0.11	0.06	0.34	9.27273		0.13	0.3	1.09	0.506667	0.38	1.11	2.82	1.43667	2.83553
Cep170	CytS		0.3	0.17	0.18	0.216667	0.24	0.26	0.45	0.316667	1.46154		0.17	0.19	0.16	0.173333	0.39	0.64	0.47	0.5	2.88462
Amotl2	CytS		1.44	2.32	1.6	1.78667	3.94	7.18	5.56	5.56	3.11194		1.83	2.38	3.28	2.49667	7.14	9.2	7.49	7.94333	3.18158
Acta1	CytS		34.23	21.88	7.43	21.18	59.71	111.3	66.85	79.2867	3.74347		14.83	23.31	30.38	22.84	28.13	98.82	106.67	77.8733	3.40952
Krt31	CytS		0.03	0.03	0.06	0.04	0	0	0.03	0.01	0.25		0.1	0.13	0.04	0.09	0.18	0.55	0.33	0.353333	3.92593
Tnnt2	CytS		1.01	0.07	0.25	0.443333	3.41	0.78	0.72	1.63667	3.69173		0.47	0.41	0.82	0.566667	1.41	1.52	4.11	2.34667	4.14118
Krt39	CytS		0	0.01	0.03	0.0133333	0.04	0.22	0.15	0.136667	10.25		0.01	0.12	0.08	0.07	0.08	0.49	0.3	0.29	4.14286
Krt80	CytS		0.31	0.43	0.13	0.29	0.68	0.84	0.64	0.72	2.48276		0.34	0.25	0.29	0.293333	0.66	2.87	2.42	1.98333	6.76136
Zbtb10	CytS		0.07	0.06	0.06	0.0633333	0.66	0.8	1.49	0.983333	15.5263		0.06	0.05	0.05	0.0533333	0.26	0.54	0.29	0.363333	6.8125
Arc	CytS		0.57	0.64	0.47	0.56	1.1	1.56	1.54	1.4	2.5		0.69	0.32	0.85	0.62	1.86	8.51	5.85	5.40667	8.72043
Tcte3	CytS		0	0.51	0	0.17	2.08	0	1.36	1.14667	6.7451		0	0	0	0	0	0	0	0	#DIV/0!
Hist1h2bh	GER		0.4	0.21	0	0.203333	0.21	1.59	0.92	0.906667	4.45902		0.43	1.59	0.96	0.993333	0	0	0	0	0
Hist1h2bf	GER		0	0	0.3	0.1	0	1.8	1.17	0.99	9.9		0	0.63	0	0.21	0	0	0	0	0
Tdpoz4	GER		0	0.02	0.03	0.0166667	0	0.05	0.35	0.133333	8		0.03	0.03	0.08	0.0466667	0	0	0.04	0.0133333	0.285714
Mafb	GER	TF	1.47	0.58	2.58	1.54333	2.44	1.93	10.14	4.83667	3.13391		0.72	0.32	0.2	0.413333	0.29	0.14	0.1	0.176667	0.427419
Gm5699	GER		0.24	3.92	12.66	5.60667	2.22	7.69	39.12	16.3433	2.91498		0.96	0.27	0.5	0.576667	0.3	0.22	0.39	0.303333	0.526012
Hist1h1b	GER		0	0.05	0	0.0166667	0.15	1.48	1.31	0.98	58.8		0.14	0.13	0.23	0.166667	0.07	0.07	0.15	0.0966667	0.58
Gm10509	GER		5.04	2.94	5.44	4.47333	6.41	15.12	14.33	11.9533	2.67213		6.17	4.41	6.89	5.82333	4.2	2.06	5.1	3.78667	0.650258
Pax8	GER	TF	1.16	1.8	2.16	1.70667	2.12	4.6	6.32	4.34667	2.54688		2.53	1.84	3.03	2.46667	1.92	1.21	1.7	1.61	0.652703
Ccdc79	GER		0.07	0.04	0.02	0.0433333	0.07	0.27	0.07	0.136667	3.15385		0.11	0.08	0.1	0.0966667	0.03	0.07	0.1	0.0666667	0.689655
Zfp9	GER	TF	0.11	0.1	0.08	0.0966667	0.26	0.49	0.22	0.323333	3.34483		0.22	0.22	0.18	0.206667	0.11	0.18	0.14	0.143333	0.693548
Pdlim2	GER	TF	8.89	7	14.64	10.1767	22.98	22.3	76.79	40.69	3.99836		16.3	9	8.81	11.37	12.1	5.55	6.26	7.97	0.700967
Nfxl1	GER	TF	7.23	9.81	7.06	8.03333	27.24	28.17	22.16	25.8567	3.21867		9.31	11	10.32	10.21	6.8	8.28	6.6	7.22667	0.707803
Akap17b	GER		0.84	0.78	1.03	0.883333	2.11	2.37	2.4	2.29333	2.59623		0.4	0.6	0.48	0.493333	0.3	0.41	0.37	0.36	0.72973
Hist1h2be	GER		0.07	0.16	0.1	0.11	0.06	0.53	0.32	0.303333	2.75758		0.26	0.14	0.28	0.226667	0.27	0.12	0.11	0.166667	0.735294
Zmynd12	GER		0.06	0.28	0.22	0.186667	0.29	0.93	0.56	0.593333	3.17857		0.12	0.23	0.17	0.173333	0.19	0.12	0.09	0.133333	0.769231
Zfp689	GER		1.22	1.44	1.46	1.37333	2.5	4.32	3.86	3.56	2.59223		1.01	1.88	1.66	1.51667	1.21	1.23	1.23	1.22333	0.806593
Fam118b	GER		17.19	12.64	11.73	13.8533	39.57	43.79	37.99	40.45	2.91987		17.04	15.19	14.25	15.4933	14.95	11.84	11.19	12.66	0.817126
Zfp39	GER	TF	0.7	1.14	1.03	0.956667	1.24	4.5	2.24	2.66	2.78049		1.36	1.13	1.28	1.25667	1.12	1.23	0.88	1.07667	0.856764
Per1	GER		15.87	8.21	6.69	10.2567	23.12	16.51	44.78	28.1367	2.74326		5.43	8.19	9.14	7.58667	6.2	7.24	6.12	6.52	0.859402
Cebpb	GER	TF	14.54	14.74	9.17	12.8167	32.77	36.29	33.69	34.25	2.6723		15.5	14.66	12.08	14.08	12.68	11.65	12.81	12.38	0.879261
Zfp110	GER	Apoptosis	17.63	22.69	17.79	19.37	47.87	69.99	45.84	54.5667	2.81707		21.54	24.91	30.05	25.5	20.65	24.3	23.03	22.66	0.888627
Btg3	GER		1.94	2.48	1.53	1.98333	4.63	8.46	5.82	6.30333	3.17815		4.96	4.79	4.15	4.63333	2.53	7.21	3.16	4.3	0.928058
Zfp51	GER		6.61	7.46	5.94	6.67	11.67	23.56	19	18.0767	2.71014		7.24	7.61	8.73	7.86	6.16	8.65	7.28	7.36333	0.936811
Zfp708	GER		1.8	2.17	1.65	1.87333	4.11	10	7.18	7.09667	3.78826		2.47	2.15	2.6	2.40667	1.91	2.37	2.58	2.28667	0.950139
Zc3h8	GER		3.44	2.73	2.47	2.88	5.19	9.73	6.83	7.25	2.51736		3.18	3.03	3.04	3.08333	2.8	3.09	2.94	2.94333	0.954595
Hist1h4i	GER		3.34	6.74	9.35	6.47667	3.57	24	29.45	19.0067	2.93464		10.09	9.18	5.07	8.11333	9.17	7.99	6.11	7.75667	0.956039
Nucb2	GER		4.06	4.94	3.49	4.16333	15.9	16.59	9.96	14.15	3.39872		6.37	6.76	6.35	6.49333	5.09	7.64	6.33	6.35333	0.978439
Hinfp	GER	TF	8.09	7.41	6.77	7.42333	22.32	16.64	19.67	19.5433	2.63269		5.41	7.19	8.17	6.92333	6.31	7.32	7.08	6.90333	0.997111
Rbm24	GER		0.07	0	0.01	0.0266667	0.66	0.15	0.01	0.273333	10.25		0	0.01	0	0.00333333	0.01	0	0	0.00333333	1
Nfatc4	GER	TF	0	0.01	0.02	0.01	0.07	0.52	0.66	0.416667	41.6667		0.01	0.01	0.01	0.01	0	0.01	0.02	0.01	1
Ccdc130	GER		3.44	3.12	2.81	3.12333	8.72	12.09	9.06	9.95667	3.18783		3.32	3	3.56	3.29333	3.54	2.89	3.46	3.29667	1.00101
Bhlha15	GER	TF	3.73	5.55	3.4	4.22667	14.83	13.43	7.24	11.8333	2.79968		8.39	9.02	7.35	8.25333	7.79	9.27	8.1	8.38667	1.01616
Zfp623	GER		11.73	11.39	8.92	10.68	24.36	36.57	30.22	30.3833	2.84488		10.04	11.77	10.59	10.8	10.17	12.4	11.45	11.34	1.05
Dmrta2	GER		0.07	0.08	0.04	0.0633333	0.13	0.25	0.12	0.166667	2.63158		0.2	0.13	0.06	0.13	0.14	0.16	0.11	0.136667	1.05128
Hist1h2bj	GER		0.15	0.47	0.58	0.4	0.32	3.1	3.36	2.26	5.65		1.64	2.11	1.83	1.86	2.01	3.62	0.35	1.99333	1.07168
Nrip2	GER		0.14	0.21	0.07	0.14	0.91	0.34	0.27	0.506667	3.61905		0.15	0.26	0.2	0.203333	0.17	0.26	0.23	0.22	1.08197
Hist2h3b	GER		0.42	0	0.27	0.23	1.06	1.77	3.14	1.99	8.65217		0.61	0.85	0	0.486667	0.63	0.62	0.33	0.526667	1.08219
Hist1h3d	GER		0.05	0.24	0.35	0.213333	0.24	0.71	0.94	0.63	2.95312		0.14	0.31	0.35	0.266667	0.26	0.37	0.24	0.29	1.0875
Zfp37	GER	TF	0.44	0.56	0.39	0.463333	1.07	2.11	1.07	1.41667	3.05755		0.77	0.58	1.22	0.856667	0.88	0.95	1.04	0.956667	1.11673
Taf1a	GER		3.97	3.02	3.09	3.36	6.23	12.14	7.93	8.76667	2.60913		4.08	3.85	4.28	4.07	3.78	4.58	5.33	4.56333	1.12121
Msh5	GER		0.47	0.4	0.64	0.503333	1.29	1.52	1.91	1.57333	3.12583		0.47	0.38	0.64	0.496667	0.44	0.46	0.78	0.56	1.12752
Hist3h2ba	GER		0.12	0.48	0.84	0.48	1.06	10.58	9.32	6.98667	14.5556		0.9	1.29	0.39	0.86	1.23	0.65	1.07	0.983333	1.14341
Zfp939	GER		1.18	0.82	0.93	0.976667	1.98	4.34	2.93	3.08333	3.157		1.25	0.88	1.16	1.09667	1.14	1.38	1.27	1.26333	1.15198
Clk4	GER		17.66	14.75	14.08	15.4967	40.32	63.38	60.43	54.71	3.53044		13.85	18.19	17.31	16.45	16.94	23.93	17.46	19.4433	1.18197
Zfp119b	GER		4.04	5.57	4.86	4.82333	9.48	34.14	25.88	23.1667	4.80304		8.19	7.63	7.8	7.87333	10.93	9.58	7.65	9.38667	1.19221
Tsc22d3	GER	TF	30.79	19.53	23.5	24.6067	82.62	71.08	129.57	94.4233	3.83731		15.67	18.52	17.22	17.1367	25.68	18.35	17.36	20.4633	1.19413
Zfp295	GER		3.95	3.01	2.64	3.2	10.56	10.25	10.68	10.4967	3.28021		2.66	3.41	3.6	3.22333	3.16	4.79	3.75	3.9	1.20993
Ppargc1a	GER	TF	7.36	4.65	5.01	5.67333	12.77	16.79	21.26	16.94	2.9859		4.65	4.91	4.97	4.84333	7.01	6.19	4.49	5.89667	1.21748
Zfp57	GER		0.05	0.07	0.09	0.07	0.73	0.91	1.16	0.933333	13.3333		0.04	0.05	0.09	0.06	0.01	0.03	0.18	0.0733333	1.22222
Klf2	GER	TF	0.02	0.11	0.07	0.0666667	0.25	0.18	0.31	0.246667	3.7		0.12	0.07	0.12	0.103333	0.2	0.1	0.08	0.126667	1.22581
Hist1h1c	GER		7.83	13.58	17.01	12.8067	44.3	118.83	131.08	98.07	7.65773		28.69	18.42	16.31	21.14	42.45	21.91	13.75	26.0367	1.23163
Zfp119a	GER		2.01	3.06	2.78	2.61667	4.21	11.6	9.46	8.42333	3.21911		3.58	3	3.69	3.42333	3.84	4.78	4.06	4.22667	1.23466
Phf10	GER	TF	55.48	55.23	39.75	50.1533	158.76	163.93	113.91	145.533	2.90177		53.34	48.94	46.63	49.6367	65.01	62.35	56.83	61.3967	1.23692
Cdkn2aip	GER		8.6	9.33	7.52	8.48333	23.08	36.89	29.15	29.7067	3.50177		9.61	9.94	9.46	9.67	11.64	13.36	11	12	1.24095
Gtpbp2	GER		30.91	28.39	29.67	29.6567	90.69	71.28	88.74	83.57	2.81792		27.23	26.54	28.21	27.3267	38.38	36.72	28.03	34.3767	1.25799
Zfp612	GER		1.82	1.37	1.7	1.63	3.21	5.11	5.17	4.49667	2.75869		1.17	1.26	1.17	1.2	1.5	1.55	1.51	1.52	1.26667
Hoxa1	GER	TF	0.04	0.04	0.08	0.0533333	0.13	0.25	0.13	0.17	3.1875		0.04	0.03	0.04	0.0366667	0.03	0.09	0.02	0.0466667	1.27273
Adnp2	GER		5.2	6.36	5.12	5.56	14.44	20.1	17.01	17.1833	3.09053		5.81	7.28	6.67	6.58667	8.55	10.39	6.6	8.51333	1.29251
Elavl3	GER		0.02	0.02	0.02	0.02	0.06	0.21	0.13	0.133333	6.66667		0.06	0.02	0.09	0.0566667	0.06	0.06	0.1	0.0733333	1.29412
Zfp438	GER		0.55	0.68	0.43	0.553333	0.99	2	1.59	1.52667	2.75904		0.63	0.71	0.66	0.666667	0.63	0.91	1.09	0.876667	1.315
Zfp622	GER		13.76	17.62	13.96	15.1133	27.43	39.21	47.92	38.1867	2.52669		17.8	19.5	17.4	18.2333	25.41	25.85	21.52	24.26	1.33053
Cpeb3	GER		0.75	0.5	0.79	0.68	2.09	1.6	2.21	1.96667	2.89216		0.31	0.45	0.48	0.413333	0.81	0.52	0.32	0.55	1.33065
Dennd4a	GER		1.84	1.07	1.31	1.40667	5.88	2.84	2.89	3.87	2.75118		0.94	1.12	0.9	0.986667	1.39	1.26	1.36	1.33667	1.35473
Zfp457	GER	TF	0.03	0.02	0.07	0.04	0.11	0.34	0.2	0.216667	5.41667		0.02	0.1	0.02	0.0466667	0.08	0.09	0.02	0.0633333	1.35714
Npas2	GER	TF	5.51	5.25	3.73	4.83	8.34	17.14	11.31	12.2633	2.53899		7.28	8.89	11.09	9.08667	7.91	10.53	18.62	12.3533	1.3595
Nxf7	GER		2.22	1.39	0.47	1.36	11.14	4.83	3.51	6.49333	4.77451		3.04	3.67	4.83	3.84667	3.74	6.14	5.9	5.26	1.36742
Hoxb9	GER	TF	0	0	0.07	0.0233333	0.16	0.08	0.13	0.123333	5.28571		10.27	7.19	11.39	9.61667	14.15	11.1	14.28	13.1767	1.37019
Mdfic	GER	TF	0.57	0.41	0.33	0.436667	3.32	1.65	1.06	2.01	4.60305		1.41	0.74	1.27	1.14	1.86	1.58	1.27	1.57	1.37719
Osr2	GER	TF	31.65	19.76	12.79	21.4	111.77	51.51	48.61	70.63	3.30047		55.46	52.27	39.22	48.9833	76.71	62.77	65.57	68.35	1.39537
Rel	GER	TF	1.64	1.59	1.59	1.60667	3.44	4.8	5.9	4.71333	2.93361		1.08	1.6	1.96	1.54667	2.15	2.35	1.98	2.16	1.39655
Atf4	GER	TF	211.57	172.28	156.35	180.067	677.83	566.78	498.64	581.083	3.22705		145.84	154.62	161.95	154.137	215.91	236.55	195.96	216.14	1.40226
BC005561	GER		3.15	1.98	2.09	2.40667	5.32	7.06	5.98	6.12	2.54294		1.68	2.83	3.37	2.62667	3.03	4.04	4	3.69	1.40482
Nr1d1	GER		20.5	31.91	12.64	21.6833	32.24	106.64	83.77	74.2167	3.42275		22.01	27.32	21.26	23.53	43.83	32.8	22.6	33.0767	1.40572
Zfp189	GER		0.31	0.36	0.49	0.386667	0.71	1.92	1.74	1.45667	3.76724		0.42	0.58	0.59	0.53	0.76	0.75	0.73	0.746667	1.40881
Ptbp2	GER		2.19	2.24	1.66	2.03	3.75	11.82	7.19	7.58667	3.73727		3.8	3.32	4.05	3.72333	4.56	6.1	5.08	5.24667	1.40913
Hist1h2ac	GER		0.05	0.2	0.15	0.133333	0.13	0.81	0.9	0.613333	4.6		0.3	0.23	0.19	0.24	0.4	0.3	0.32	0.34	1.41667
Atf6	GER	TF	11.36	11.92	11.44	11.5733	43.66	40.48	32.29	38.81	3.3534		12.93	15.1	12.91	13.6467	24.98	18.74	14.65	19.4567	1.42574
Rhbdd1	GER		14.72	11.94	9.59	12.0833	40.89	38.59	27.17	35.55	2.94207		12.14	12.49	13.4	12.6767	18.69	18.51	17.08	18.0933	1.42729
Nr4a2	GER		1.28	2.06	1.63	1.65667	4.51	5.01	5.5	5.00667	3.02213		1.9	2.38	2.24	2.17333	2.82	3.9	2.69	3.13667	1.44325
Hist3h2a	GER		2.91	3.27	3.74	3.30667	6.04	10.06	11.02	9.04	2.73387		4.29	3.71	3.18	3.72667	6.72	4.53	5.01	5.42	1.45438
Ints6	GER		5.13	5.67	4.56	5.12	13.29	20.16	13.17	15.54	3.03516		4.69	6.01	5.91	5.53667	7.07	9.24	8.49	8.26667	1.49308
Zfp280d	GER		5.46	5.86	5.03	5.45	10.55	18.55	14.05	14.3833	2.63914		5.35	6.89	6.61	6.28333	8.84	10.17	9.47	9.49333	1.51088
Nrip3	GER		0.04	0.11	0.05	0.0666667	0.2	0.41	0.56	0.39	5.85		0.07	0.08	0.22	0.123333	0.12	0.25	0.19	0.186667	1.51351
Rev1	GER		7.33	5.99	5.64	6.32	14.43	17.36	19.44	17.0767	2.702		4.89	5.36	5.44	5.23	8.68	8.31	7.22	8.07	1.54302
Nfil3	GER	TF	12.64	6.64	7.53	8.93667	65.96	88.3	102.74	85.6667	9.58598		4.09	5.42	4.74	4.75	6.01	9.49	6.96	7.48667	1.57614
Nfkb2	GER	TF	13.85	9.78	9.93	11.1867	34.29	25.31	33.85	31.15	2.78456		11.09	14.55	17.37	14.3367	21	25.7	24.4	23.7	1.6531
Taf1d	GER		26.27	32.75	18.62	25.88	58.86	170.3	83.51	104.223	4.02718		35.16	34.93	41.96	37.35	55.74	70.32	60.83	62.2967	1.66792
Nr1h4	GER		37.8	17.28	20.18	25.0867	128.21	73.97	85.6	95.9267	3.82381		18.93	17.07	19.35	18.45	35.38	31.67	26.22	31.09	1.68509
Gm5286	GER	TF	0	0.54	1.04	0.526667	0.02	3	8.13	3.71667	7.05696		0.04	0.03	0.04	0.0366667	0.04	0.11	0.04	0.0633333	1.72727
Ahr	GER		4.87	4.62	4.71	4.73333	8.64	15.88	27.08	17.2	3.6338		2.6	3.32	3.44	3.12	4.94	6.08	5.4	5.47333	1.75427
Mecom	GER	TF	8.13	4.32	3.17	5.20667	9.83	13.98	15.48	13.0967	2.51536		12.43	14.68	12.78	13.2967	19.69	25.57	24.84	23.3667	1.75733
Epc1	GER		7.91	7.91	6.24	7.35333	15.29	20.82	19.94	18.6833	2.5408		8.67	9.27	8.27	8.73667	14.72	16.28	15.09	15.3633	1.75849
Chd5	GER		0.28	0.1	0.21	0.196667	1.27	0.52	0.87	0.886667	4.50847		0.12	0.1	0.2	0.14	0.24	0.21	0.29	0.246667	1.7619
Lmo4	GER	TF	16	18.24	9.89	14.71	57.34	60.42	33.07	50.2767	3.41786		18.05	18.82	16.51	17.7933	31.42	35.71	30.56	32.5633	1.83009
Apobec1	GER		6.68	6.39	13.92	8.99667	16.22	25.48	49.94	30.5467	3.39533		6.04	3.68	2.29	4.00333	12.37	5.69	3.92	7.32667	1.83014
Isg20	GER		1.12	1.38	0.93	1.14333	9.2	10.87	7.27	9.11333	7.97085		1.78	1.77	2.59	2.04667	3	4.18	4.08	3.75333	1.83388
Hist1h3i	GER		0.05	0.1	0.09	0.08	0.05	0.78	0.68	0.503333	6.29167		0.21	0.19	0	0.133333	0.32	0.32	0.11	0.25	1.875
Gm5619	GER		0	0.56	0.51	0.356667	1.43	1.53	0.5	1.15333	3.23364		0	0.54	1.3	0.613333	1.19	1.75	0.62	1.18667	1.93478
Lbh	GER		1.77	3.86	2.45	2.69333	22.83	43.5	97.18	54.5033	20.2364		6.4	6.07	4.27	5.58	8.8	14.43	9.22	10.8167	1.93847
Hoxd3	GER	TF	0.06	0.01	0.03	0.0333333	0.29	0.02	0.02	0.11	3.3		0.17	0.13	0.24	0.18	0.23	0.24	0.59	0.353333	1.96296
Ing3	GER		2.72	3.44	2.9	3.02	6.02	11.06	8.19	8.42333	2.78918		4.26	4.4	4.2	4.28667	7.62	9.29	8.37	8.42667	1.96579
Bcl6	GER	TF	6.03	6.04	4.97	5.68	13.2	19.22	24.37	18.93	3.33275		4.94	6.78	6.49	6.07	11.13	14.27	10.78	12.06	1.98682
Rfx4	GER	TF	0.02	0.02	0.1	0.0466667	0.17	0.12	0.2	0.163333	3.5		0.01	0.01	0	0.00666667	0.02	0.01	0.01	0.0133333	2
Csrnp1	GER		2	1.64	1.42	1.68667	5.47	4.76	9.68	6.63667	3.93478		1.99	1.39	1.6	1.66	2.42	5.08	2.89	3.46333	2.08635
Zfp959	GER		5.89	5.93	7.26	6.36	15.39	32.4	25.26	24.35	3.82862		8.89	8.04	6.33	7.75333	16.76	17.45	14.66	16.29	2.10103
Pnrc1	GER		27.65	39.9	35.99	34.5133	51.31	90.24	151.43	97.66	2.82963		39.71	45.53	41.63	42.29	81.37	104.59	80.61	88.8567	2.10113
Atxn7	GER		7.29	5.02	6.4	6.23667	14.92	15.97	18.37	16.42	2.63282		3.88	5.28	4.78	4.64667	10.35	10.83	9.2	10.1267	2.17934
Glcci1	GER		1.95	2.96	2.44	2.45	4.91	8.81	6.2	6.64	2.7102		2.81	3.57	3.2	3.19333	6.43	8.07	6.52	7.00667	2.19415
Zfp568	GER		3.51	3.44	3.54	3.49667	9.25	9.67	9.93	9.61667	2.75024		2.41	4.21	3.21	3.27667	6.87	9.27	5.51	7.21667	2.20244
Hist2h3c1	GER		0.64	0.33	0.92	0.63	3.34	4.84	4.97	4.38333	6.95767		1.39	1.12	1.16	1.22333	2.31	2.09	3.69	2.69667	2.20436
Hist1h3c	GER		0	0.17	0	0.0566667	0.17	1.11	1.51	0.93	16.4118		0	0.97	0	0.323333	0.36	1.42	0.38	0.72	2.2268
Hist1h2bb	GER		0	0.08	0.22	0.1	0.16	0.78	0.14	0.36	3.6		0.5	0.15	0.18	0.276667	0.34	0.99	0.53	0.62	2.24096
Arid5b	GER		2.76	5.59	4.21	4.18667	4.7	12.92	19.18	12.2667	2.92994		5.09	11.14	9.77	8.66667	18.06	25.27	18.36	20.5633	2.37269
Hist1h1d	GER		0.07	0.13	0.09	0.0966667	0.31	1.73	1.73	1.25667	13		0.17	0.11	0.12	0.133333	0.45	0.3	0.21	0.32	2.4
Jdp2	GER	TF	7.24	1.63	0.36	3.07667	35.26	10.47	4.23	16.6533	5.41278		2.59	2.19	4.25	3.01	8.74	6.4	6.73	7.29	2.42193
Mospd1	GER		8.84	11.13	12.02	10.6633	23.52	15.77	20.2	19.83	1.85964		13.98	12.15	9.88	12.0033	35.68	34.72	21.88	30.76	2.56262
Chd2	GER		8.24	9.07	8.79	8.7	25.02	47.19	48.36	40.19	4.61954		6.67	10.22	10.71	9.2	22.23	28.42	21.02	23.89	2.59674
Klf6	GER	TF	16.37	18.85	18.27	17.83	32.94	48.02	64.74	48.5667	2.72387		28.32	26.6	31.96	28.96	67.16	98.89	63.9	76.65	2.64675
Srf	GER	TF	11.71	13.45	9.05	11.4033	15.93	23.17	17.14	18.7467	1.64396		13.83	14.94	14.16	14.31	25.34	52.51	36.73	38.1933	2.669
Abtb2	GER		0.07	0.14	0.19	0.133333	0.28	0.34	0.42	0.346667	2.6		0.1	0.18	0.1	0.126667	0.26	0.4	0.39	0.35	2.76316
Maff	GER	TF	11.8	10.29	8.56	10.2167	17.11	14.44	32.93	21.4933	2.10375		9.6	11.2	13.85	11.55	23.98	44.61	28.15	32.2467	2.79192
Foxn3	GER		1.38	4.18	2.9	2.82	1.42	4.86	3.78	3.35333	1.18913		2.01	4.99	4.07	3.69	9.17	13.31	8.66	10.38	2.81301
Nr1d2	GER		5.01	15.05	7.69	9.25	7.34	25.09	23.15	18.5267	2.00288		15.5	16.11	14.35	15.32	45.69	50.27	36.66	44.2067	2.88555
Arid5a	GER		0.27	0.2	0.16	0.21	2.12	0.97	1	1.36333	6.49206		0.46	0.46	0.52	0.48	0.93	1.89	1.37	1.39667	2.90972
Npm2	GER		0.18	0.12	0.07	0.123333	0.27	0.23	0.25	0.25	2.02703		0.05	0.05	0.08	0.06	0.18	0.17	0.18	0.176667	2.94444
Hist1h4b	GER		0	0	0.05	0.0166667	0	0.19	0.1	0.0966667	5.8		0.24	0	0	0.08	0.12	0.35	0.25	0.24	3
Fhl4	GER	TF	0.02	0.01	0.02	0.0166667	0.09	0.09	0.23	0.136667	8.2		0.01	0	0.01	0.00666667	0.04	0.01	0.01	0.02	3
Asz1	GER		0.03	0.01	0.01	0.0166667	0.07	0.23	0.17	0.156667	9.4		0.12	0.06	0.05	0.0766667	0.21	0.14	0.34	0.23	3
Clu	GER		0.36	0.4	0.28	0.346667	0.42	0.36	0.59	0.456667	1.31731		0.21	0.39	0.62	0.406667	0.22	1.1	2.43	1.25	3.07377
Cpeb2	GER		11.88	4.5	5.44	7.27333	29.14	17.9	23.62	23.5533	3.23831		4.22	5.73	4.85	4.93333	12.8	18.89	13.9	15.1967	3.08041
Foxq1	GER	TF	2.53	5.69	2.39	3.53667	4.1	12.67	7.88	8.21667	2.32328		3.89	4.21	5.23	4.44333	11.58	16.21	13.82	13.87	3.12153
Tceal7	GER	TF	0.02	0	0	0.00666667	0.02	0	0	0.00666667	1		0.08	0.07	0.03	0.06	0.1	0.23	0.24	0.19	3.16667
Bach2	GER		0.02	0.11	0.09	0.0733333	0.06	0.12	0.12	0.1	1.36364		0.09	0.12	0.12	0.11	0.44	0.34	0.28	0.353333	3.21212
Jun	GER	TF	10.14	9.85	9.71	9.9	27.73	43.38	57.21	42.7733	4.32054		11.33	12.79	10.57	11.5633	25.42	55.52	31.47	37.47	3.24042
Atf5	GER	TF	128.77	66.41	57.18	84.12	301.16	217.87	197.72	238.917	2.84019		46.51	46.35	37.29	43.3833	146.38	151.13	129.11	142.207	3.27791
Nupr1	GER		70.55	121.68	28.36	73.53	435.99	592.44	347.54	458.657	6.23768		58.59	89.69	98.57	82.2833	179.62	358.18	274.93	270.91	3.2924
Gbx1	GER	TF	0.06	0.04	0.04	0.0466667	0.34	0.49	0.4	0.41	8.78571		0.02	0.03	0.05	0.0333333	0.09	0.16	0.09	0.113333	3.4
Rax	GER	TF	0.01	0.12	0.03	0.0533333	0.03	0.27	0.06	0.12	2.25		0.04	0.05	0.05	0.0466667	0.04	0.13	0.32	0.163333	3.5
Fos	GER	TF	8.8	16.21	7.14	10.7167	17.5	18.45	30.37	22.1067	2.06283		10.14	9.51	13.28	10.9767	22.43	69.95	32.36	41.58	3.78804
Msl3l2	GER	TF	0.04	0.04	0.02	0.0333333	0.09	0.22	0.04	0.116667	3.5		0.01	0.01	0.01	0.01	0	0.04	0.08	0.04	4
Otud1	GER		0.06	0.39	0.42	0.29	0.06	0.33	0.47	0.286667	0.988506		0.23	0.1	0.08	0.136667	0.68	0.58	0.4	0.553333	4.04878
Hist1h3h	GER		0	0.49	0	0.163333	0	0.18	0.15	0.11	0.673469		0.34	0	0	0.113333	0	1.38	0	0.46	4.05882
Nat14	GER		0.71	0.63	0.52	0.62	2.84	2.69	1.67	2.4	3.87097		0.63	0.69	0.65	0.656667	1.79	3.3	3.4	2.83	4.30964
Egr1	GER	TF	14.98	11.72	6.7	11.1333	18.72	20.72	32.15	23.8633	2.14341		8.65	7.86	12.71	9.74	29.98	62.16	34.68	42.2733	4.34018
Hist1h4f	GER		0	0.14	0.13	0.09	0	0.31	0.37	0.226667	2.51852		0.58	0	0	0.193333	0.89	0.88	0.93	0.9	4.65517
Hist1h3b	GER		0	0.11	0	0.0366667	0.05	0	0.1	0.05	1.36364		0	0.1	0	0.0333333	0	0.11	0.36	0.156667	4.7
Gm6096	GER		0	0.11	0.07	0.06	0	0.16	0	0.0533333	0.888889		0	0.07	0.08	0.05	0.23	0.38	0.16	0.256667	5.13333
Zmynd15	GER	TF	0.17	0.05	0.09	0.103333	0.32	0.27	0.58	0.39	3.77419		0.09	0.11	0.13	0.11	0.55	0.73	0.45	0.576667	5.24242			x
Hist1h1e	GER		0.04	0.09	0.27	0.133333	0.63	1.45	1.32	1.13333	8.5		0.24	0.09	0.16	0.163333	0.93	1.24	0.4	0.856667	5.2449
Hist1h4c	GER		0.38	0.69	0.09	0.386667	0	0.33	0	0.11	0.284483		0.21	0.38	0	0.196667	0.64	2.09	0.44	1.05667	5.37288
Hist1h4d	GER		0.35	0	0	0.116667	0	1.62	0.66	0.76	6.51429		0.58	0	0.43	0.336667	1.57	2.13	1.84	1.84667	5.48515
Rora	GER		0.04	0.06	0.03	0.0433333	0.06	0.08	0.09	0.0766667	1.76923		0.06	0.09	0.08	0.0766667	0.26	0.56	0.45	0.423333	5.52174
Mei4	GER		0.09	0.13	0.08	0.1	0.84	1.02	0.54	0.8	8		0.05	0.02	0	0.0233333	0.15	0.16	0.09	0.133333	5.71429
Atf3	GER	TF	23.17	6.38	10.13	13.2267	173.88	122.47	183.12	159.823	12.0834		9.84	8.12	7.97	8.64333	42.38	83.6	34.31	53.43	6.18164
Nr4a1	GER		1.45	1.3	0.71	1.15333	16.77	15.23	20.55	17.5167	15.1879		0.99	0.99	2.92	1.63333	3.21	18.43	10.11	10.5833	6.47959
Hist1h1a	GER		0.02	0.1	0.03	0.05	0	0.49	0.53	0.34	6.8		0	0.03	0.07	0.0333333	0.24	0.4	0.21	0.283333	8.5
Vgll3	GER	TF	0.02	0.03	0.01	0.02	0.02	0.02	0.02	0.02	1		0.04	0.07	0.02	0.0433333	0.33	0.28	0.56	0.39	9
Nr4a3	GER	TF	0.05	0.01	0.03	0.03	0.71	0.38	0.69	0.593333	19.7778		0.02	0.03	0.02	0.0233333	0.22	0.33	0.14	0.23	9.85714
Hist2h2ac	GER		0.3	0.08	0	0.126667	0.48	0.26	0.41	0.383333	3.02632		0	0	0.18	0.06	0.5	0.81	0.69	0.666667	11.1111
Fosl1	GER	TF	0.35	0.13	0.07	0.183333	1.36	0.84	1.04	1.08	5.89091		0.24	0.22	0.27	0.243333	2.13	6.04	2.68	3.61667	14.863
Egr4	GER	TF	0	0	0	0	0.02	0.02	0	0.0133333	#DIV/0!		0.01	0.01	0	0.00666667	0.01	0.21	0.09	0.103333	15.5
Fosb	GER	TF	0.06	0.07	0.07	0.0666667	2.55	1.14	2.17	1.95333	29.3		0.11	0.05	0.08	0.08	0.99	2.13	0.76	1.29333	16.1667
Wwtr1	GER		0.01	0.49	0.11	0.203333	0.32	1.27	0.63	0.74	3.63934		0.01	0.01	0	0.00666667	0.02	0.13	0.18	0.11	16.5
Egr2	GER	TF	0.25	0.16	0.18	0.196667	0.3	1.49	1.59	1.12667	5.72881		0.2	0.13	0.16	0.163333	1.47	5.6	2.71	3.26	19.9592
Egr3	GER	TF	0.02	0.02	0	0.0133333	0.09	0.05	0.26	0.133333	10		0	0	0.04	0.0133333	0.09	0.53	0.4	0.34	25.5
Gm5698	GER		0	0.04	0.04	0.0266667	0.47	1.89	2.35	1.57	58.875		0	0	0	0	0	0.16	0	0.0533333	#DIV/0!
Rbm11	GER		0.02	0.02	0.05	0.03	0.06	0.15	0.13	0.113333	3.77778		0.03	0	0.02	0.0166667	0.11	0.03	0.07	0.07	4.2
Cyp1a1	M		0.86	0.22	0.45	0.51	1.54	0.23	2.9	1.55667	3.05229		0.23	0.38	0.11	0.24	0.1	0.05	0.03	0.06	0.25			x
Pld4	M		0.09	0.09	0.12	0.1	0.29	0.33	0.25	0.29	2.9		0.22	0.2	0.2	0.206667	0.11	0.12	0.08	0.103333	0.5
Pdia4	M	Stress	71.52	73.56	56.5	67.1933	276.32	204.71	121.64	200.89	2.98973		63.75	71.94	72.08	69.2567	40.48	39.18	47.36	42.34	0.611349
Fkbp14	M		0.62	0.84	1.21	0.89	1.88	3.16	3.36	2.8	3.14607		0.69	0.92	1.13	0.913333	0.47	0.71	0.62	0.6	0.656934
Alg12	M		5.64	5.36	5.07	5.35667	15.39	25.18	13.87	18.1467	3.38768		5.89	5.13	5.32	5.44667	4.74	3.66	3.82	4.07333	0.747858
Dgat2	M		124.19	52.19	115.58	97.32	137.89	84.58	558.32	260.263	2.6743		51.81	38.8	31.2	40.6033	48.47	22.74	20.39	30.5333	0.751991
Steap1	M		6.77	5.45	2.3	4.84	37.86	27.77	15.44	27.0233	5.58333		6.24	6.2	7.14	6.52667	5.36	6.23	4.86	5.48333	0.840143
Cyb5r1	M		24.5	23.85	15.86	21.4033	82.69	48.75	31.74	54.3933	2.54135		25.43	22.92	27.25	25.2	19.15	21.52	23.79	21.4867	0.852646
Sdr42e1	M		8.83	5.71	4.29	6.27667	18.83	19.32	11.85	16.6667	2.65534		7.88	8.47	10.27	8.87333	6.85	8.25	8.61	7.90333	0.890684
Gpcpd1	M		5.51	3.96	6.37	5.28	18.05	20.36	24.41	20.94	3.96591		4.91	3.96	4.4	4.42333	4.33	4.48	3.61	4.14	0.935946
Fkbp7	M		0.34	0.73	0.63	0.566667	2.18	7.74	3.96	4.62667	8.16471		1.21	0.92	0.74	0.956667	1.09	0.78	0.98	0.95	0.993031
Hao2	M		0.03	0.03	0.01	0.0233333	0.15	0.37	0.25	0.256667	11		0.16	0.07	0.09	0.106667	0.21	0.05	0.06	0.106667	1
Ormdl3	M		20.09	17.65	27.3	21.68	48.33	50.54	83.68	60.85	2.80673		17.23	14.68	13.58	15.1633	18.99	14.26	13.16	15.47	1.02022
Dhrs9	M		0.57	0.42	1.3	0.763333	3.34	3.95	9.09	5.46	7.15284		0.17	0.21	0.53	0.303333	0.28	0.24	0.42	0.313333	1.03297
Sesn2	M		17.96	10.06	8.41	12.1433	49.16	43.8	45.42	46.1267	3.79852		7.9	9.02	9.8	8.90667	10.63	8.82	8.17	9.20667	1.03368
Car6	M		0.18	0.37	0.2	0.25	0.72	1.84	1.51	1.35667	5.42667		0.2	0.11	0.27	0.193333	0.3	0.15	0.15	0.2	1.03448
Gpx7	M		0.13	0.19	0.47	0.263333	0.06	0.41	2.02	0.83	3.1519		0.13	0.07	0.19	0.13	0.08	0.15	0.22	0.15	1.15385
Rdh12	M		0.03	0.01	0.03	0.0233333	0.31	0.08	0.26	0.216667	9.28571		0.16	0.18	0.18	0.173333	0.28	0.22	0.11	0.203333	1.17308
Sult1a1	M		0.1	0.06	0.04	0.0666667	0.12	0.15	0.29	0.186667	2.8		0.06	0.06	0.11	0.0766667	0.03	0.13	0.13	0.0966667	1.26087
Steap2	M		4.1	4.28	2.22	3.53333	10.86	11.88	5.86	9.53333	2.69811		2.72	3.5	3.67	3.29667	4.2	5.03	3.42	4.21667	1.27907
Fam135a	M		17.24	19.63	18.13	18.3333	43.07	49.27	48.09	46.81	2.55327		17.18	18.54	21.46	19.06	23.35	28	22.31	24.5533	1.28821
Ccdc76	M		2.14	1.59	1.37	1.7	4.95	8.66	5.01	6.20667	3.65098		1.35	1.94	1.99	1.76	2.01	2.55	2.46	2.34	1.32955
Plcxd2	M		2.68	3.1	2.87	2.88333	9.57	8.5	7.79	8.62	2.9896		2.24	3.56	3.76	3.18667	3.33	5.18	4.59	4.36667	1.37029
Tph1	M		8.9	9.23	9.32	9.15	30	23.09	38.7	30.5967	3.3439		5.25	4.18	7.77	5.73333	6.98	7.91	9	7.96333	1.38895
Tat	M		0.02	0.02	0.01	0.0166667	0.1	0.29	0.26	0.216667	13		0	0.03	0.02	0.0166667	0.02	0.02	0.03	0.0233333	1.4
Acox2	M		18.41	14.35	13.7	15.4867	79.49	46.84	48.07	58.1333	3.75377		11.62	10.66	8.95	10.41	18.48	14.66	12.09	15.0767	1.44829
Erlin1	M		43.67	35.85	40.45	39.99	112.86	96.65	100.78	103.43	2.5864		29.99	24.33	19.51	24.61	54.28	29.87	23.67	35.94	1.46038
Agxt2	M		0.22	0.08	0.34	0.213333	0.39	0.35	0.95	0.563333	2.64062		0.05	0.04	0.04	0.0433333	0.12	0.04	0.03	0.0633333	1.46154
Cyp3a44	M		0	0.09	0.56	0.216667	0.3	0.27	1.28	0.616667	2.84615		0.09	0.04	0	0.0433333	0	0.14	0.05	0.0633333	1.46154
Aldh1l2	M		4.4	4.88	3.31	4.19667	16.7	15.06	12.06	14.6067	3.48054		2.6	3.46	3.44	3.16667	4.65	5.11	4.14	4.63333	1.46316
Tars	M		87.76	61.58	52	67.1133	188.35	183.48	132.82	168.217	2.50646		55.45	58.39	57.16	57	90.16	87.31	76.24	84.57	1.48368
Cox6a2	M		0.45	0.83	0.1	0.46	2.69	2.5	1.6	2.26333	4.92029		0.2	0.36	0.09	0.216667	0.36	0.36	0.25	0.323333	1.49231
Hsd3b3	M		1.96	1.89	6.46	3.43667	11.58	6.32	17.96	11.9533	3.47818		15.12	10.23	11.83	12.3933	31.32	10.48	15.26	19.02	1.5347
Asns	M		113.43	103.97	68.16	95.1867	270.33	308.94	206.62	261.963	2.7521		92.33	79.96	98.1	90.13	143.84	154.29	137.42	145.183	1.61082
Cars	M		28.09	24.75	19.86	24.2333	59.77	79.86	56.21	65.28	2.69381		20.44	21.1	22.58	21.3733	40.17	39.29	24.2	34.5533	1.61666
Extl1	M		0.84	0.74	1.06	0.88	2.93	2.76	6.2	3.96333	4.50379		0.94	1.1	0.83	0.956667	1.56	2.11	1.24	1.63667	1.7108
Pck1	M		1.38	0.65	2.79	1.60667	5.69	3.61	15.56	8.28667	5.15768		0.56	0.37	0.78	0.57	1.51	0.71	0.72	0.98	1.7193
Olah	M		0	0.01	0	0.00333333	0.02	0.4	0.36	0.26	78		0.02	0	0.02	0.0133333	0	0.05	0.02	0.0233333	1.75
Mthfd2	M		58.83	44.75	32.87	45.4833	176.46	191.48	131.88	166.607	3.66303		36.61	35.22	42.02	37.95	76.55	69.66	60.87	69.0267	1.81888
Gpt2	M		7.77	6.2	4.48	6.15	25.21	29.83	19.06	24.7	4.01626		6.24	6.61	8.01	6.95333	13.12	13.31	12.14	12.8567	1.84899
Mthfr	M		3.9	3.16	3.17	3.41	17.65	19.86	18.41	18.64	5.46628		2.91	3.73	3.66	3.43333	7.6	7.01	4.78	6.46333	1.88252
Fabp3	M		0.04	0.06	0.04	0.0466667	0.19	0.21	0.4	0.266667	5.71429		0.06	0.14	0.04	0.08	0.1	0.19	0.17	0.153333	1.91667
Cyb5r2	M		0.14	0.1	0.11	0.116667	0.85	0.74	0.7	0.763333	6.54286		0.04	0.07	0.1	0.07	0.15	0.15	0.11	0.136667	1.95238
Fut1	M		0.56	1	0.24	0.6	4.55	11.24	3.99	6.59333	10.9889		0.4	0.57	0.98	0.65	0.94	1.42	1.48	1.28	1.96923
Acot2	M		13.37	12.24	16	13.87	64.57	49.01	50.81	54.7967	3.95073		4.23	4.27	2.81	3.77	7.22	8.02	7.11	7.45	1.97613
Stbd1	M		1.72	4.24	1.15	2.37	8.02	15.05	6.52	9.86333	4.16174		0.18	0.27	0.47	0.306667	0.25	0.7	0.88	0.61	1.98913
Trib1	M		11.9	10.28	9.39	10.5233	29.85	33.85	36.77	33.49	3.18245		15.72	13.66	17.46	15.6133	26.03	44.7	29.67	33.4667	2.14347
Hmox1	M		27.48	5.53	5.76	12.9233	72.37	99.79	138.62	103.593	8.01599		3.76	4.18	4.73	4.22333	5.57	10.28	14.02	9.95667	2.35754
Pfkfb3	M		39.06	18.51	19.51	25.6933	54.84	56.67	129.32	80.2767	3.12442		11.56	22.28	24.88	19.5733	28.58	65.61	49.59	47.9267	2.44857
Csgalnact1	M		0.34	0.3	0.85	0.496667	2.34	2.55	4.92	3.27	6.58389		0.24	0.18	0.15	0.19	0.67	0.38	0.37	0.473333	2.49123
Chka	M		26.69	21.66	29.74	26.03	64.05	54.98	98.72	72.5833	2.78845		22.61	20.41	19.46	20.8267	62	55.56	41.84	53.1333	2.55122
Ptgs2	M		0.04	0.01	0.07	0.04	0.27	0.07	0.22	0.186667	4.66667		0.02	0.03	0.02	0.0233333	0.06	0.11	0.01	0.06	2.57143
Cdyl2	M		0.1	0.09	0.03	0.0733333	0.15	0.3	0.15	0.2	2.72727		0.02	0.05	0.08	0.05	0.1	0.15	0.15	0.133333	2.66667
Nme5	M		0.13	0.08	0.13	0.113333	0.07	0.09	0.06	0.0733333	0.647059		0.06	0	0.07	0.0433333	0.09	0.15	0.12	0.12	2.76923
Plcxd3	M		0.15	0.1	0.08	0.11	0.1	0.05	0.11	0.0866667	0.787879		0.06	0.08	0.07	0.07	0.16	0.21	0.23	0.2	2.85714
Mgea5	M		32.9	23.34	22.01	26.0833	42.32	48.57	45.88	45.59	1.74786		24.58	23.67	23.92	24.0567	61.68	78.22	68.5	69.4667	2.88763
Nnat	M		0.89	0.14	0.37	0.466667	0.86	0.19	0.42	0.49	1.05		0.24	0.11	0.38	0.243333	0.49	1.14	0.6	0.743333	3.05479
B3gnt4	M		0.13	0.11	0.17	0.136667	0.14	0.28	0.18	0.2	1.46341		0.13	0.09	0.06	0.0933333	0.31	0.28	0.28	0.29	3.10714
Ugt8a	M		0.03	0.01	0.04	0.0266667	0.19	0.22	0.15	0.186667	7		0.05	0.04	0.03	0.04	0.17	0.1	0.11	0.126667	3.16667
Fn3k	M		0.21	0.35	0.21	0.256667	0.2	0.12	0.09	0.136667	0.532468		0.61	0.43	0.47	0.503333	1.29	1.83	1.69	1.60333	3.18543
Car15	M		0.79	0.87	0.7	0.786667	1.87	1.96	1.93	1.92	2.44068		1.15	1.3	1.01	1.15333	2.8	4.43	4.03	3.75333	3.25434
Pdk4	M		0.11	0.51	0.97	0.53	0.26	0.23	2.78	1.09	2.0566		0.04	0.03	0.03	0.0333333	0.06	0.08	0.2	0.113333	3.4
Aloxe3	M		0.04	0.01	0.01	0.02	0.18	0.06	0.08	0.106667	5.33333		0.05	0.04	0.07	0.0533333	0.14	0.2	0.23	0.19	3.5625
Oxct2a	M		0.08	0	0.07	0.05	0.08	0	0.14	0.0733333	1.46667		0	0	0.55	0.183333	0.51	0.83	0.88	0.74	4.03636
Aass	M		0.02	0.02	0.05	0.03	0.01	0.11	0.05	0.0566667	1.88889		0.05	0.07	0.03	0.05	0.25	0.22	0.17	0.213333	4.26667
Lor	M		0.05	0.05	0.02	0.04	0.11	0.05	0.18	0.113333	2.83333		0.03	0.05	0.08	0.0533333	0.14	0.37	0.3	0.27	5.0625
Dct	M		0.34	0.18	0.14	0.22	0.38	0.2	0.2	0.26	1.18182		0.15	0.32	0.08	0.183333	0.54	1.72	1.44	1.23333	6.72727
Glipr1	M		1.34	1.52	0.89	1.25	2.35	8.19	5.01	5.18333	4.14667		0.21	0.25	0.31	0.256667	2	6.88	11.19	6.69	26.0649
Pilrb2	RPME	Receptor	0	0	0.07	0.0233333	0.01	0.12	0.2	0.11	4.71429		0	0.02	0	0.00666667	0	0	0	0	0
Cd27	RPME		0.21	0.04	0.1	0.116667	0.63	0.16	0.22	0.336667	2.88571		0.02	0.1	0.21	0.11	0.03	0.05	0.03	0.0366667	0.333333
Emid2	RPME		0.29	0.72	0.18	0.396667	1.48	1.71	0.75	1.31333	3.31092		0.57	0.33	0.29	0.396667	0.23	0.12	0.19	0.18	0.453782
Olfr99	RPME	Receptor	0.17	0.03	0.09	0.0966667	0.84	1.2	0.66	0.9	9.31034		0.16	0.05	0.12	0.11	0.05	0	0.11	0.0533333	0.484848
Fcer1g	RPME		0.09	0.04	0.13	0.0866667	0.09	0.04	0.81	0.313333	3.61538		0.11	0.07	0.17	0.116667	0.11	0	0.08	0.0633333	0.542857
Klkb1	RPME		0.05	0.06	0.24	0.116667	0.05	0.54	0.86	0.483333	4.14286		0.07	0.03	0.01	0.0366667	0.03	0.03	0	0.02	0.545455
Otog	RPME		0.05	0.06	0.02	0.0433333	0.38	0.07	0.05	0.166667	3.84615		0.02	0.08	0.05	0.05	0.03	0.02	0.04	0.03	0.6
Creld2	RPME		39.58	23.95	22.35	28.6267	285.52	175.03	104.56	188.37	6.58023		23.99	24.99	21.98	23.6533	15.28	12.53	15.28	14.3633	0.607244
Chrnb4	RPME		0.1	0.02	0.01	0.0433333	0.05	0.13	0.15	0.11	2.53846		0.13	0.21	0.26	0.2	0.11	0.18	0.09	0.126667	0.633333
Hs3st3b1	RPME		0.19	0.16	0.28	0.21	0.89	0.58	0.54	0.67	3.19048		1.39	1.69	2.03	1.70333	0.82	1.13	1.37	1.10667	0.649706
Flrt1	RPME		0.12	0.08	0.05	0.0833333	0.36	0.26	0.29	0.303333	3.64		0.02	0.03	0.04	0.03	0.01	0.02	0.03	0.02	0.666667
Optc	RPME		0.06	0.08	0.03	0.0566667	0.46	0.58	0.34	0.46	8.11765		0.03	0.07	0.14	0.08	0.03	0.04	0.09	0.0533333	0.666667
Ccr10	RPME	Receptor	0.06	0.03	0.04	0.0433333	0.13	0.07	0.14	0.113333	2.61538		0.06	0.09	0.06	0.07	0.01	0.06	0.1	0.0566667	0.809524
Col18a1	RPME		0.05	0.06	0.03	0.0466667	0.12	0.09	0.16	0.123333	2.64286		0.12	0.11	0.08	0.103333	0.09	0.07	0.1	0.0866667	0.83871
Creld1	RPME		1.62	3.08	1.69	2.13	5.67	8.95	6.52	7.04667	3.30829		1.81	2.1	2.51	2.14	1.49	2.54	1.6	1.87667	0.876947
H2-Bl	RPME		4.94	1.56	5.61	4.03667	12.54	8.31	15.85	12.2333	3.03055		1.45	1.08	1.01	1.18	1.71	0.68	0.79	1.06	0.898305
Scarf2	RPME	Receptor	0.1	0.07	0.1	0.09	0.52	0.51	0.41	0.48	5.33333		0.2	0.1	0.22	0.173333	0.15	0.27	0.07	0.163333	0.942308
Hepacam	RPME		0.03	0.11	0.01	0.05	0.19	0.29	0.17	0.216667	4.33333		0.11	0.03	0.12	0.0866667	0.09	0.1	0.07	0.0866667	1
Clec2i	RPME		0	0	0.03	0.01	0.05	0.11	0.15	0.103333	10.3333		0	0.03	0	0.01	0	0.03	0	0.01	1
Pecam1	RPME		0.22	0.11	0.15	0.16	0.61	0.81	0.6	0.673333	4.20833		0.19	0.11	0.1	0.133333	0.13	0.2	0.08	0.136667	1.025
Fcrlb	RPME		0.04	0.07	0.2	0.103333	0.19	0.2	0.65	0.346667	3.35484		0.08	0.07	0.04	0.0633333	0.12	0.04	0.04	0.0666667	1.05263
Cdh11	RPME		0.9	0.76	0.61	0.756667	2.59	4.09	2.73	3.13667	4.14537		0.6	0.74	0.91	0.75	0.84	0.78	0.95	0.856667	1.14222
Prrt2	RPME		0.1	0	0	0.0333333	0.14	0.19	0.19	0.173333	5.2		0.14	0	0.16	0.1	0.15	0	0.23	0.126667	1.26667
Tnfrsf13b	RPME		0.01	0.01	0.04	0.02	0.14	0.26	0.32	0.24	12		0.03	0.01	0.03	0.0233333	0.05	0.04	0	0.03	1.28571
Hyal1	RPME		0.96	0.54	0.92	0.806667	2.13	1.66	2.47	2.08667	2.58678		0.8	0.89	1.84	1.17667	0.81	1.86	2	1.55667	1.32295
Lysmd3	RPME		11.21	8.26	11.56	10.3433	35.59	27.35	40.56	34.5	3.33548		7.85	8.16	7.05	7.68667	13.04	10.76	8.58	10.7933	1.40416
Ccdc134	RPME		18.96	18.2	16.16	17.7733	54.74	57.8	48.6	53.7133	3.02213		11.36	11.57	12	11.6433	21.97	13.04	15.44	16.8167	1.44432
Bglap-rs1	RPME		0.08	0.27	0.5	0.283333	1.28	4.74	8.27	4.76333	16.8118		0.5	1.02	0.4	0.64	0.91	1.36	0.53	0.933333	1.45833
Vmn1r32	RPME	Receptor	0	0.02	0.01	0.01	0.09	0.18	0.25	0.173333	17.3333		0.07	0.02	0.01	0.0333333	0.07	0.07	0.01	0.05	1.5
Unc5b	RPME	Receptor	14.03	6.4	6.49	8.97333	46.68	26.33	22.65	31.8867	3.55349		8.85	9.63	7.97	8.81667	17.38	13.63	9.27	13.4267	1.52287
Slamf9	RPME		2.37	2.42	1.16	1.98333	8.44	17.91	10.95	12.4333	6.26891		2.71	3.02	5.04	3.59	4.92	6.25	5.35	5.50667	1.53389
Atl1	RPME		0.19	0.16	0.08	0.143333	0.36	0.69	0.47	0.506667	3.53488		0.14	0.15	0.16	0.15	0.2	0.18	0.35	0.243333	1.62222
Col20a1	RPME		0.76	0.35	0.42	0.51	1.86	1.14	0.96	1.32	2.58824		0.34	0.19	0.79	0.44	0.45	0.53	1.2	0.726667	1.65152
Fbln5	RPME		0	0.01	0.04	0.0166667	0.1	0.1	0.12	0.106667	6.4		0.02	0	0.01	0.01	0.02	0.01	0.02	0.0166667	1.66667
Ly6g6c	RPME		0.29	0.13	0.3	0.24	18.75	11.12	30.35	20.0733	83.6389		0.31	0.17	0.06	0.18	0.32	0.39	0.19	0.3	1.66667
Icam1	RPME		0.19	0.02	0.06	0.09	0.43	0.39	0.27	0.363333	4.03704		0.07	0.06	0.04	0.0566667	0.06	0.12	0.11	0.0966667	1.70588
F5	RPME		0.15	0.11	0.35	0.203333	0.27	1.03	2.16	1.15333	5.67213		0.13	0.14	0.05	0.106667	0.21	0.26	0.08	0.183333	1.71875
Bdkrb2	RPME		0.23	0.08	0.1	0.136667	0.47	0.26	0.32	0.35	2.56098		0.21	0.3	0.57	0.36	0.53	0.36	0.97	0.62	1.72222
Nptx2	RPME		0.89	2.12	2.95	1.98667	1.34	4.12	14.54	6.66667	3.3557		0.13	0.19	0.41	0.243333	0.22	0.26	0.79	0.423333	1.73973
Lphn3	RPME	Receptor	0.03	0.2	0.13	0.12	0.07	0.72	0.62	0.47	3.91667		0.08	0.07	0.18	0.11	0.19	0.2	0.19	0.193333	1.75758
Drd3	RPME	Receptor	0.05	0.02	0.11	0.06	0.2	0.24	0.47	0.303333	5.05556		0.05	0.03	0.02	0.0333333	0.05	0.08	0.05	0.06	1.8
P2rx7	RPME	Receptor	0.02	0	0	0.00666667	0.02	0.22	0.22	0.153333	23		0.03	0.02	0.08	0.0433333	0.05	0.1	0.09	0.08	1.84615
Ghrhr	RPME	Receptor	0.13	0.09	0.13	0.116667	0.18	0.81	0.81	0.6	5.14286		0.41	0.39	0.29	0.363333	0.54	0.92	0.59	0.683333	1.88073
AU023871	RPME		0.17	0.3	0.5	0.323333	1.73	1.37	2.49	1.86333	5.76289		0.36	0.3	0.21	0.29	0.58	0.65	0.42	0.55	1.89655
Fcamr	RPME		0.24	0.69	0.43	0.453333	0.68	1.38	1.67	1.24333	2.74265		0.47	0.35	0.72	0.513333	0.72	1.07	1.14	0.976667	1.9026
Vldlr	RPME	Receptor	7.07	6.4	3.36	5.61	22.64	25.74	19.93	22.77	4.05882		4.98	5.09	6.97	5.68	9.96	11.38	11.87	11.07	1.94894
Igsf11	RPME		0.16	0.18	0.12	0.153333	0.36	1.3	0.57	0.743333	4.84783		0.17	0.1	0.13	0.133333	0.18	0.44	0.2	0.273333	2.05
Sectm1a	RPME		0.3	1.97	2.28	1.51667	0.66	6.56	5.13	4.11667	2.71429		1.56	1.51	2.52	1.86333	2.83	4.05	4.61	3.83	2.05546
Adrb2	RPME	Receptor	0.4	0.21	0.26	0.29	0.93	0.57	0.68	0.726667	2.50575		0.34	0.32	0.42	0.36	0.51	0.86	0.85	0.74	2.05556
Heg1	RPME		0.42	0.72	0.79	0.643333	0.57	2.01	2.89	1.82333	2.8342		0.66	0.56	0.74	0.653333	1.17	1.51	1.43	1.37	2.09694
Olfr713	RPME	Receptor	0.08	0.05	0.1	0.0766667	0.05	0.2	0.91	0.386667	5.04348		0.38	0.4	0	0.26	0.95	0.6	0.12	0.556667	2.14103
Sema3c	RPME		2.23	2.38	2.03	2.21333	6.71	8.36	5.35	6.80667	3.0753		6.24	7.78	10.69	8.23667	11.19	20.2	22.44	17.9433	2.17847
Col8a1	RPME		0.05	0.01	0.04	0.0333333	0.08	0.32	0.45	0.283333	8.5		0.1	0.11	0.1	0.103333	0.23	0.25	0.23	0.236667	2.29032
Tnfrsf19	RPME		0.01	0.02	0.01	0.0133333	0.21	0.37	0.23	0.27	20.25		0.03	0.05	0.08	0.0533333	0.04	0.13	0.2	0.123333	2.3125
Areg	RPME		164.38	70.3	56.04	96.9067	474.37	444.35	496.82	471.847	4.86908		54.73	38.6	66.75	53.36	106.01	165.89	115.4	129.1	2.41942
Klrg2	RPME	Receptor	0.05	0.06	0.12	0.0766667	0.16	0.14	0.27	0.19	2.47826		0.16	0.19	0.12	0.156667	0.35	0.42	0.42	0.396667	2.53191
Pvr	RPME	Receptor	16.79	9.18	11.19	12.3867	41.34	35.48	49.88	42.2333	3.40958		8.76	10.83	13.15	10.9133	24.22	33.03	26.26	27.8367	2.5507
Tnfrsf25	RPME		0.5	0.19	0.13	0.273333	0.31	0.15	0.19	0.216667	0.792683		0.22	0.3	0.32	0.28	0.57	0.72	0.86	0.716667	2.55952
Pdgfrl	RPME	Receptor	0.07	0.13	0.16	0.12	0.08	0.13	0.08	0.0966667	0.805556		0.03	0.09	0.02	0.0466667	0.16	0.12	0.08	0.12	2.57143
Fam82a1	RPME		0.06	0.01	0.02	0.03	0.07	0.01	0.01	0.03	1		0.11	0.07	0.01	0.0633333	0.22	0.16	0.11	0.163333	2.57895
H2-M2	RPME		0.65	0.02	0.12	0.263333	1.74	0.96	2.9	1.86667	7.08861		0.05	0.02	0.06	0.0433333	0.19	0.1	0.05	0.113333	2.61538
Lrrc24	RPME		0.24	0.13	0.17	0.18	0.57	0.62	0.53	0.573333	3.18519		0.03	0.07	0.12	0.0733333	0.17	0.22	0.2	0.196667	2.68182
Niacr1	RPME	Receptor	0.01	0.02	0.05	0.0266667	0.07	0.01	0.01	0.03	1.125		0.01	0.05	0.07	0.0433333	0.09	0.1	0.16	0.116667	2.69231
Gpr22	RPME		0.13	0.4	0.25	0.26	0.15	0.98	0.51	0.546667	2.10256		0.22	0.2	0.19	0.203333	0.58	0.57	0.51	0.553333	2.72131
Olfr165	RPME	Receptor	0.56	0.19	1.44	0.73	1.32	0.47	2.55	1.44667	1.98174		0.86	0.25	0.06	0.39	2.45	0.43	0.31	1.06333	2.7265
Dsg1c	RPME		0.01	0.02	0.01	0.0133333	0	0.01	0.05	0.02	1.5		0.02	0.07	0.1	0.0633333	0.11	0.16	0.25	0.173333	2.73684
Gjb4	RPME		0.07	0.02	0	0.03	0.07	0	0	0.0233333	0.777778		0.03	0.08	0.09	0.0666667	0.02	0.1	0.43	0.183333	2.75
Flrt3	RPME		8.16	9.78	9.18	9.04	12.37	15.99	17.4	15.2533	1.68732		6.3	5.25	5.02	5.52333	18.69	15.08	11.95	15.24	2.7592
Cd209c	RPME		0.46	0.44	0.8	0.566667	0.88	8.99	11.02	6.96333	12.2882		0.64	0.7	0.53	0.623333	1.49	2.19	1.55	1.74333	2.79679
Olfml2a	RPME	Receptor	0.01	0.04	0.03	0.0266667	0.03	0.13	0.12	0.0933333	3.5		0.05	0.1	0.1	0.0833333	0.19	0.34	0.18	0.236667	2.84
Adamts7	RPME		0.01	0.01	0.01	0.01	0.02	0.06	0.07	0.05	5		0.03	0.07	0.05	0.05	0.08	0.26	0.09	0.143333	2.86667
Scube2	RPME		0.01	0	0.01	0.00666667	0	0	0	0	0		0.01	0.08	0.02	0.0366667	0.06	0.13	0.13	0.106667	2.90909
Epha7	RPME	Receptor	0.06	0.11	0.09	0.0866667	0.02	0.15	0.08	0.0833333	0.961538		0.03	0.11	0.09	0.0766667	0.1	0.31	0.28	0.23	3
Slitrk6	RPME		0.28	0.47	0.22	0.323333	0.15	0.8	0.2	0.383333	1.18557		1.83	1.26	1.6	1.56333	6.1	2.93	5.09	4.70667	3.01066
Adamts16	RPME		0.01	0.02	0.01	0.0133333	0	0	0.01	0.00333333	0.25		0.03	0.13	0.06	0.0733333	0.08	0.36	0.23	0.223333	3.04545
Chodl	RPME		0	0	0.01	0.00333333	0	0	0	0	0		0.04	0.09	0.03	0.0533333	0.06	0.24	0.19	0.163333	3.0625
Dsg4	RPME		0.04	0.05	0.07	0.0533333	0.09	0.19	0.45	0.243333	4.5625		0.05	0.07	0.04	0.0533333	0.26	0.13	0.1	0.163333	3.0625
Lypd6b	RPME		0.24	0.13	0.07	0.146667	0.25	0.2	0.34	0.263333	1.79545		0.45	0.39	0.21	0.35	0.8	1.36	1.07	1.07667	3.07619
Itga1	RPME		1.48	2.08	1.31	1.62333	3.29	5.79	3.27	4.11667	2.53593		1.53	2.09	3.26	2.29333	4.4	7.54	9.44	7.12667	3.10756
Jam3	RPME	Receptor	0	0.07	0.03	0.0333333	0.04	0.07	0.03	0.0466667	1.4		0.05	0.02	0.06	0.0433333	0.19	0.11	0.11	0.136667	3.15385
Cd244	RPME		0.29	0.36	0.44	0.363333	0.03	0.32	0.1	0.15	0.412844		0.79	0.96	0.41	0.72	2.13	2.67	2.05	2.28333	3.1713
Spon1	RPME		0.06	0.05	0.03	0.0466667	0.19	0.06	0.12	0.123333	2.64286		0.05	0.05	0.04	0.0466667	0.16	0.17	0.12	0.15	3.21429
Itgb6	RPME		1.74	2.86	1.61	2.07	4.95	10.37	6.02	7.11333	3.43639		2.21	2.56	3.76	2.84333	5.91	11.93	9.66	9.16667	3.22392
Ptprt	RPME		0.05	0.01	0.01	0.0233333	0.07	0.04	0.07	0.06	2.57143		0.05	0.06	0.04	0.05	0.18	0.17	0.14	0.163333	3.26667
Tnfrsf11b	RPME		0.52	0.19	0.19	0.3	1.59	0.76	0.43	0.926667	3.08889		1.44	0.94	1.13	1.17	2.85	4.27	4.42	3.84667	3.28775
Cldn4	RPME		40.68	37.37	34.05	37.3667	85.36	80.09	85.53	83.66	2.23889		70.15	46	83.22	66.4567	132.32	331.96	233.49	232.59	3.49987
Grin3b	RPME	Receptor	0.06	0.07	0.09	0.0733333	0.21	0.19	0.32	0.24	3.27273		0.06	0.09	0.05	0.0666667	0.21	0.2	0.29	0.233333	3.5
Aoc3	RPME		0.07	0.01	0.1	0.06	0.29	0.17	0.25	0.236667	3.94444		0.03	0.02	0.03	0.0266667	0.11	0.1	0.07	0.0933333	3.5
Lag3	RPME		0.03	0.12	0.09	0.08	0.2	0.18	0.08	0.153333	1.91667		0.06	0.13	0.14	0.11	0.22	0.7	0.39	0.436667	3.9697
Gypa	RPME		0.01	0	0	0.00333333	0.21	0.08	0.03	0.106667	32		0.01	0	0	0.00333333	0.03	0.01	0	0.0133333	4
Cdh9	RPME		0.01	0.11	0.11	0.0766667	0	0.25	0.21	0.153333	2		0.14	0.11	0.08	0.11	0.64	0.39	0.35	0.46	4.18182
Gpr17	RPME		0.07	0.06	0.09	0.0733333	0.19	0.17	0.33	0.23	3.13636		0.08	0.08	0.06	0.0733333	0.31	0.23	0.39	0.31	4.22727
Tcp11l2	RPME	Receptor	0.27	1.31	1.32	0.966667	0.31	1.3	1.43	1.01333	1.04828		1.2	1.56	1.47	1.41	5.79	7.32	5.01	6.04	4.28369
Mtnr1a	RPME	Receptor	0.31	0.23	0.65	0.396667	0.92	0.86	1.55	1.11	2.79832		0.08	0.08	0.13	0.0966667	0.22	0.37	0.67	0.42	4.34483
Tspan18	RPME		0	0	0	0	0.05	0	0	0.0166667	#DIV/0!		0	0	0.06	0.02	0.05	0.21	0.06	0.106667	5.33333
Cd52	RPME		0.05	0.02	0.04	0.0366667	0.1	0.08	0.09	0.09	2.45455		0.05	0	0	0.0166667	0.1	0.1	0.11	0.103333	6.2
Prnd	RPME		0.22	0.03	0.01	0.0866667	0.43	0.06	0.2	0.23	2.65385		0.06	0.05	0.12	0.0766667	0.13	0.71	0.6	0.48	6.26087
Izumo1	RPME		0.02	0	0.01	0.01	0.23	0.62	0.32	0.39	39		0	0	0.04	0.0133333	0.03	0.11	0.12	0.0866667	6.5
Col11a2	RPME		0.21	0.16	0.11	0.16	0.61	0.54	0.46	0.536667	3.35417		0.11	0.13	0.16	0.133333	0.52	0.86	1.48	0.953333	7.15
Ptprq	RPME		0.01	0.01	0.02	0.0133333	0.17	0.17	0.16	0.166667	12.5		0.03	0.03	0.01	0.0233333	0.18	0.19	0.18	0.183333	7.85714
Plaur	RPME	Receptor	4.26	2.65	1.97	2.96	9.01	5.94	6.5	7.15	2.41554		4.22	3.42	8.09	5.24333	14.92	72.78	53.51	47.07	8.97711
Ceacam12	RPME		0	0.09	0.02	0.0366667	0.01	0.08	0.01	0.0333333	0.909091		0.1	0.11	0.11	0.106667	0.35	1.59	1.02	0.986667	9.25
Apobr	RPME	Receptor	0.19	0.07	0.01	0.09	2.87	1	0.66	1.51	16.7778		0.09	0.05	0.02	0.0533333	0.42	0.49	0.61	0.506667	9.5
Galr2	RPME	Receptor	0.05	0.03	0.09	0.0566667	0.1	0.13	0.14	0.123333	2.17647		0.07	0.03	0	0.0333333	0.39	0.42	0.21	0.34	10.2
P2rx6	RPME	Receptor	0.03	0.06	0.03	0.04	0.12	0.14	0.06	0.106667	2.66667		0.03	0.04	0.02	0.03	0.24	0.5	0.38	0.373333	12.4444
Sema3d	RPME		0.05	0.11	0.14	0.1	0.04	0.26	0.51	0.27	2.7		0	0	0	0	0	0	0	0	#DIV/0!
Olfr325	RPME	Receptor	0	0	0.24	0.08	0.07	0.87	0.77	0.57	7.125		0	0	0	0	0	0.14	0	0.0466667	#DIV/0!
Cp	RPME		0	0.02	0.05	0.0233333	0.06	0.31	0.57	0.313333	13.4286		0	0	0	0	0.01	0	0	0.00333333	#DIV/0!
Olfr1383	RPME	Receptor	0.02	0	0	0.00666667	0.03	0.08	0.33	0.146667	22		0	0	0	0	0	0	0	0	#DIV/0!
Il23a	SEC		0.02	0.05	0.05	0.04	0.33	0.46	0.5	0.43	10.75		0	0.08	0.08	0.0533333	0.05	0.02	0	0.0233333	0.4375
C3	SEC		0.07	0.17	0.1	0.113333	0.42	0.4	0.4	0.406667	3.58824		0.06	0.12	0.31	0.163333	0.06	0.07	0.1	0.0766667	0.469388
Manf	SEC		50.05	45.81	32.21	42.69	243.1	191.73	107.44	180.757	4.23417		50.8	44.85	44.51	46.72	26.14	24.83	24.1	25.0233	0.535602
Angptl6	SEC		1.56	3.16	1.01	1.91	6.88	6.27	4.82	5.99	3.13613		1.58	1.41	1.59	1.52667	0.77	1.07	0.88	0.906667	0.593886
C1qtnf1	SEC		0.25	0.26	0.2	0.236667	0.54	0.87	0.74	0.716667	3.02817		0.24	0.59	0.17	0.333333	0.15	0.32	0.15	0.206667	0.62
Gdf15	SEC		26.84	9.25	4.71	13.6	61.45	38.75	40.21	46.8033	3.44142		4.21	8.36	12.66	8.41	4.63	7.3	8.04	6.65667	0.791518
Hpx	SEC		0.02	0.03	0.03	0.0266667	0.13	0.07	0.22	0.14	5.25		0.07	0.01	0.07	0.05	0	0.05	0.07	0.04	0.8
Fam131a	SEC		0.04	0.03	0.05	0.04	0.15	0.13	0.1	0.126667	3.16667		0.08	0.07	0.04	0.0633333	0.05	0.05	0.06	0.0533333	0.842105
Saa3	SEC		0.22	0.44	0.02	0.226667	4.78	0.83	1.16	2.25667	9.95588		0.27	0.25	0.55	0.356667	0.17	0.22	0.52	0.303333	0.850467
Defb40	SEC		0.63	0.92	0.48	0.676667	1.96	3.53	4.48	3.32333	4.91133		3.29	1.83	3.06	2.72667	3.15	2.13	1.89	2.39	0.876528
Gzmm	SEC		0.25	0.05	0.14	0.146667	0.59	0.4	0.26	0.416667	2.84091		0.15	0.29	0.27	0.236667	0.35	0.21	0.24	0.266667	1.12676
Ihh	SEC		42.48	50.57	41.92	44.99	104.02	98.32	176.78	126.373	2.80892		46.59	45.37	59.3	50.42	60.28	52.91	59.89	57.6933	1.14425
Lgals3	SEC		6.75	7.46	5.56	6.59	36.6	27.39	42.24	35.41	5.37329		25.79	30.94	44.95	33.8933	29.19	34.84	58.19	40.74	1.20201
Vgf	SEC		1.15	0.59	0.79	0.843333	3.02	1.88	5.69	3.53	4.18577		0.55	0.45	0.8	0.6	0.61	0.76	0.89	0.753333	1.25556
Megf9	SEC		2.49	0.93	0.95	1.45667	10.23	9.25	12.74	10.74	7.373		4.52	5.91	4.45	4.96	7.62	6.89	4.85	6.45333	1.30108
Figf	SEC		0.08	0.11	0.07	0.0866667	0.21	0.31	0.46	0.326667	3.76923		0.1	0.16	0.13	0.13	0.1	0.29	0.12	0.17	1.30769
Vegfa	SEC		64.62	39.83	40.74	48.3967	138.36	124.96	162.18	141.833	2.93064		25.73	44.91	51.94	40.86	38.22	68.43	62.39	56.3467	1.37902
Btc	SEC		19.17	11.44	6.39	12.3333	39.91	38.54	26.98	35.1433	2.84946		9.39	7.13	11.09	9.20333	8.93	14.31	15	12.7467	1.38501
Ovgp1	SEC		0.47	0.56	0.45	0.493333	1.08	1.63	1.02	1.24333	2.52027		0.5	0.71	0.7	0.636667	0.48	1.54	0.71	0.91	1.42932
Stc2	SEC	Stress	25.56	32.88	10.86	23.1	75.84	105.83	52.38	78.0167	3.37734		24.09	41.83	47.32	37.7467	32.13	63.51	72.13	55.9233	1.48154
Pspn	SEC		0.18	0.08	0.15	0.136667	0.27	0.58	0.4	0.416667	3.04878		0.16	0.25	0.12	0.176667	0.28	0.22	0.29	0.263333	1.49057
Fgf21	SEC		0.02	0.03	0	0.0166667	0.6	1.53	0.89	1.00667	60.4		0.03	0.02	0.03	0.0266667	0.03	0.03	0.06	0.04	1.5
Tac4	SEC		0.02	0.06	0.03	0.0366667	0.39	1.04	0.53	0.653333	17.8182		0.16	0.11	0.17	0.146667	0.14	0.37	0.16	0.223333	1.52273
Lcn2	SEC		0.27	0.12	0.25	0.213333	3.84	0.69	1.02	1.85	8.67188		0.05	0.05	0.06	0.0533333	0.11	0.08	0.06	0.0833333	1.5625
Egf	SEC		0.14	0.25	0.19	0.193333	0.34	0.9	0.52	0.586667	3.03448		0.36	0.31	0.24	0.303333	0.45	0.66	0.36	0.49	1.61538
Npff	SEC		0.16	0.06	0.18	0.133333	0.38	0.56	0.63	0.523333	3.925		0.59	0.33	0.26	0.393333	0.85	0.59	0.57	0.67	1.70339
Vegfc	SEC		3.25	3.31	2.78	3.11333	9.74	11.41	11.05	10.7333	3.44754		2.18	2.22	1.97	2.12333	4.28	3.57	3.03	3.62667	1.70801
S100g	SEC		153.18	85.89	150.48	129.85	708.17	647.51	1311.61	889.097	6.84711		56.55	25	41.94	41.1633	72.8	68.66	70.63	70.6967	1.71747
Il1rn	SEC		2.47	1.18	0.85	1.5	7.7	2.56	1.9	4.05333	2.70222		9.22	5.44	19.72	11.46	12.67	12.16	36.35	20.3933	1.77952
Tnf	SEC		0.19	0.09	0.07	0.116667	0.5	0.37	0.18	0.35	3		0.59	0.98	1.92	1.16333	1.09	2.64	3.09	2.27333	1.95415
Adm2	SEC		13.14	16.4	8.98	12.84	51.82	92.68	55.35	66.6167	5.18821		9.14	10.97	11.3	10.47	19.78	20.58	22.06	20.8067	1.98727
Apom	SEC		0.03	0.06	0.18	0.09	0.33	0.56	0.14	0.343333	3.81481		0.1	0.09	0.15	0.113333	0.31	0.23	0.14	0.226667	2
Slit2	SEC		4.11	3.84	2.29	3.41333	11.48	7.91	8.37	9.25333	2.71094		1.85	3.69	2.5	2.68	4.76	8.61	4.56	5.97667	2.2301
Cfp	SEC		0.48	0.36	0.67	0.503333	0.51	0.32	0.48	0.436667	0.86755		0.46	0.38	0.36	0.4	0.84	1.22	0.97	1.01	2.525
Tff2	SEC		0	0.12	0	0.04	0	0.09	0	0.03	0.75		0	0.08	0.15	0.0766667	0	0.13	0.51	0.213333	2.78261
Cxcl5	SEC		0	0.01	0	0.00333333	0.08	0.05	0.4	0.176667	53		0	0.03	0.02	0.0166667	0.02	0.06	0.06	0.0466667	2.8
F3	SEC		28.18	11.11	7.48	15.59	95.24	30.69	37.69	54.54	3.4984		28.02	17.87	52.95	32.9467	53.5	129.07	114.4	98.99	3.00455
Hbegf	SEC		6.2	5.11	4.45	5.25333	7.35	6.69	8.22	7.42	1.41244		5.94	4.83	8.41	6.39333	12.96	26.82	17.91	19.23	3.00782
Gm6484	SEC		10.51	6.7	7.01	8.07333	93.9	125.59	116.79	112.093	13.8844		4.03	3.57	3.61	3.73667	16.07	10.01	8.41	11.4967	3.07672
Hgf	SEC		0.07	0.01	0	0.0266667	0.19	0.09	0.03	0.103333	3.875		1.2	1.75	1.54	1.49667	6.27	4.92	2.8	4.66333	3.11581
Gdf9	SEC		2.31	2.51	3.73	2.85	4.15	4.3	7.58	5.34333	1.87485		0.36	0.38	0.13	0.29	1.13	0.87	0.75	0.916667	3.16092
Cxcl2	SEC		0	0.02	0.02	0.0133333	0.01	0.11	0.22	0.113333	8.5		0.03	0	0.03	0.02	0.03	0.08	0.08	0.0633333	3.16667
Csf1	SEC		0.15	0.08	0.13	0.12	0.51	0.45	0.62	0.526667	4.38889		0.03	0.04	0.01	0.0266667	0.07	0.1	0.09	0.0866667	3.25
Edn2	SEC		1.58	1.48	3.65	2.23667	0.77	1.03	1.75	1.18333	0.529061		7.47	2.61	0.68	3.58667	15.8	16.46	6.18	12.8133	3.57249
Psors1c2	SEC		0.03	0.06	0.08	0.0566667	0.06	0.06	0.11	0.0766667	1.35294		0.06	0.08	0.03	0.0566667	0.12	0.24	0.34	0.233333	4.11765
Cxcl1	SEC		0.02	0	0.03	0.0166667	0.23	0.31	0.5	0.346667	20.8		0.03	0.09	0.09	0.07	0.37	0.34	0.38	0.363333	5.19048
Il11	SEC		0.18	0.05	0.04	0.09	0.37	0.27	0.15	0.263333	2.92593		0.1	0.04	0	0.0466667	0.14	0.26	0.36	0.253333	5.42857
Ccl20	SEC		4.85	3.28	7.2	5.11	35.95	51.33	167.27	84.85	16.6047		2.31	1.41	0.59	1.43667	18.6	7.15	4.48	10.0767	7.01392
Ctgf	SEC		0.01	0.13	0.02	0.0533333	0.02	0.54	0.21	0.256667	4.8125		0.07	0.11	0.14	0.106667	0.36	1.29	0.85	0.833333	7.8125
Tnfsf15	SEC		0.19	0.14	0.34	0.223333	0.32	0.51	1.59	0.806667	3.61194		0.54	0.64	0.46	0.546667	4.54	6.53	3.1	4.72333	8.64024
Calca	SEC		0	0	0.05	0.0166667	0.17	0.18	0.16	0.17	10.2		0	0	0.03	0.01	0.06	0.03	0.18	0.09	9
Cyr61	SEC		0.94	2.08	1	1.34	3.75	14	7.17	8.30667	6.199		3	2.61	3.53	3.04667	14.56	55.01	21.46	30.3433	9.95952
Edn1	SEC		0.32	1.2	0.78	0.766667	1.39	8.43	2.87	4.23	5.51739		3.15	1.6	3.33	2.69333	23.22	45.75	24.12	31.03	11.521
Cxcl10	SEC		0.04	0.11	0.1	0.0833333	2.72	7.06	9.95	6.57667	78.92		0.07	0.23	0.17	0.156667	1.23	4.43	2.42	2.69333	17.1915
Thbs1	SEC	Stress	0.71	0.37	0.22	0.433333	11.38	13.24	11.19	11.9367	27.5462		1.39	2.48	2.96	2.27667	14.68	80.99	30.59	42.0867	18.4861
Plau	SEC		0.03	0.01	0.02	0.02	0	0.05	0.03	0.0266667	1.33333		0	0	0.01	0.00333333	0.04	0.17	0.15	0.12	36
Reg2	SEC		0	0	0.1	0.0333333	0.14	0.08	0.09	0.103333	3.1		0	0	0	0	0.04	0.15	0.04	0.0766667	#DIV/0!
Gm13271	SEC		0	0	0.21	0.07	0.46	0.49	0.2	0.383333	5.47619		0	0	0	0	0	0	0	0	#DIV/0!
Treml4	SEC		0	0.03	0	0.01	0	0.28	0.38	0.22	22		0	0	0	0	0	0	0	0	#DIV/0!
2310001K24Rik			0.08	0.12	0.04	0.08	0.04	0.05	0.66	0.25	3.125		0.09	0	0	0.03	0	0	0	0	0
Gm11106			0	0.14	0	0.0466667	0.14	0.6	0	0.246667	5.28571		0	0.26	0.32	0.193333	0	0	0	0	0
6030419C18Rik			0.32	0.15	0.05	0.173333	0.94	0.5	0.16	0.533333	3.07692		0.31	0.26	0.81	0.46	0	0.11	0.33	0.146667	0.318841
Gm2897			0.26	0	0	0.0866667	0.56	0.3	0	0.286667	3.30769		0.57	0.52	0.63	0.573333	0	0	0.6	0.2	0.348837
BC051019			0.01	0.02	0	0.01	0.01	0.17	0.17	0.116667	11.6667		0.04	0.01	0	0.0166667	0	0.01	0.01	0.00666667	0.4
4933422H20Rik			0.29	0.18	0.81	0.426667	0.31	0.62	2.31	1.08	2.53125		0.09	0.14	0.04	0.09	0.08	0.04	0.01	0.0433333	0.481481
Amz1			0.48	0.68	0.31	0.49	1.35	2.09	1.38	1.60667	3.27891		0.8	0.78	1.24	0.94	0.52	0.49	0.53	0.513333	0.546099
Gm4883			0.41	0.3	0.27	0.326667	0.47	1.48	0.53	0.826667	2.53061		0.07	0.13	0.31	0.17	0	0.07	0.22	0.0966667	0.568627
4930578N16Rik			0.17	0.27	0.15	0.196667	0.27	0.98	0.48	0.576667	2.9322		0.16	0.25	0.19	0.2	0.13	0.05	0.18	0.12	0.6
1700027D21Rik			0.03	0.15	0.1	0.0933333	0.31	0.39	0.45	0.383333	4.10714		0.13	0.1	0.2	0.143333	0.02	0.09	0.15	0.0866667	0.604651
AC165266.1			12.63	19.66	12.67	14.9867	14.74	59.23	43.16	39.0433	2.6052		12.07	11.86	14.86	12.93	7.23	8.77	7.96	7.98667	0.617685
1700054O19Rik			0.05	0	0.13	0.06	0.05	0.47	0.26	0.26	4.33333		0.2	0	0.45	0.216667	0.1	0.1	0.21	0.136667	0.630769
BC028528			0	0.06	0.04	0.0333333	0.04	0.14	0.17	0.116667	3.5		0	0.04	0.1	0.0466667	0	0	0.09	0.03	0.642857
AC148019.2			0.05	0.06	0.04	0.05	0.12	0.67	0.4	0.396667	7.93333		0.04	0.08	0.07	0.0633333	0.04	0.04	0.05	0.0433333	0.684211
4933437F05Rik			0	0.11	0.02	0.0433333	0.2	0.1	0.11	0.136667	3.15385		0.13	0.08	0.02	0.0766667	0.02	0.07	0.07	0.0533333	0.695652
Ttc25			0.11	0.29	0.29	0.23	0.31	1.36	0.25	0.64	2.78261		0.38	0.26	0.47	0.37	0.24	0.29	0.26	0.263333	0.711712
CT572983.1			0.06	0.05	0.03	0.0466667	0.11	0.2	0.05	0.12	2.57143		0.02	0.1	0.06	0.06	0.04	0.05	0.04	0.0433333	0.722222
1700034F02Rik			0.03	0.02	0.04	0.03	0.06	0.2	0.12	0.126667	4.22222		0.02	0.05	0.04	0.0366667	0.02	0.05	0.01	0.0266667	0.727273
Tsx			0.06	0.1	0	0.0533333	0.09	0.22	0.13	0.146667	2.75		0.67	0.45	0.27	0.463333	0.41	0.49	0.16	0.353333	0.76259
4933403G14Rik			0.22	0.12	0.12	0.153333	0.31	0.63	0.49	0.476667	3.1087		0.6	0.27	0.28	0.383333	0.38	0.29	0.22	0.296667	0.773913
Gm7592			0.31	0.15	0.45	0.303333	0.24	0.87	2.39	1.16667	3.84615		0.31	0.25	0.45	0.336667	0.27	0.22	0.33	0.273333	0.811881
C630004H02Rik			13.98	10.05	8.28	10.77	42.72	32.96	26.73	34.1367	3.16961		10.39	10.83	11.17	10.7967	7.9	10.29	8.37	8.85333	0.820006
Tprg			0.02	0.08	0.06	0.0533333	0.03	0.13	0.38	0.18	3.375		0.02	0.02	0.08	0.04	0	0.05	0.05	0.0333333	0.833333
Lrrc27			0.26	0.3	0.28	0.28	0.79	0.93	0.66	0.793333	2.83333		0.36	0.3	0.33	0.33	0.37	0.2	0.29	0.286667	0.868687
Zc3h6			1.86	3.1	1.8	2.25333	4.01	11.14	7.99	7.71333	3.42308		2.5	2.96	4.21	3.22333	2.41	3.72	2.31	2.81333	0.872802
Gm10503			0.42	0.54	0.42	0.46	0.66	1.71	1.76	1.37667	2.99275		0.89	0.44	0.73	0.686667	0.47	0.64	0.7	0.603333	0.878641
1810074P20Rik			14.58	11.7	9.43	11.9033	33.57	34.54	24.3	30.8033	2.58779		10.66	10.39	11.45	10.8333	9.5	9.62	9.62	9.58	0.884308
D16Ertd472e			0.06	0.06	0.05	0.0566667	0.14	0.33	0.11	0.193333	3.41176		0.02	0.04	0.03	0.03	0	0.01	0.07	0.0266667	0.888889
Spata5			6.34	5.05	4.11	5.16667	12.7	19.94	9.88	14.1733	2.74323		5.22	5.58	5.18	5.32667	4.4	4.93	5.31	4.88	0.916145
Gm10939			1.75	1.55	1.73	1.67667	4.03	7.18	6.71	5.97333	3.56262		1.41	1.82	2.57	1.93333	1.35	1.71	2.28	1.78	0.92069
1700024P16Rik			0.37	0.16	0.18	0.236667	1.08	0.35	0.42	0.616667	2.60563		0.54	0.37	0.5	0.47	0.63	0.42	0.3	0.45	0.957447
Cdr2l			2.06	1.7	1.07	1.61	7.36	3.96	3.47	4.93	3.06211		1.64	1.36	1.26	1.42	1.45	1.22	1.48	1.38333	0.974178
AC156990.1			0.11	0.12	0.1	0.11	0.27	1.1	1	0.79	7.18182		0.11	0.15	0.18	0.146667	0.13	0.07	0.23	0.143333	0.977273
Armcx3			2.56	2.02	1.66	2.08	7.62	5.56	4.37	5.85	2.8125		1.3	0.99	1.72	1.33667	1.07	1.4	1.51	1.32667	0.992519
Gm4795			0.04	0.08	0.08	0.0666667	0.04	0.59	0.45	0.36	5.4		0.09	0	0	0.03	0	0	0.09	0.03	1
RP23-83K12.3			0.5	0	0.24	0.246667	1.07	1.14	0.46	0.89	3.60811		1.08	0.5	0.6	0.726667	0	1.09	1.15	0.746667	1.02752
Lrrc39			2.39	1.62	2.21	2.07333	3.74	4.72	8.76	5.74	2.76849		1.29	0.67	0.91	0.956667	1.5	0.81	0.64	0.983333	1.02787
Rpl15-ps2			0	1.24	0.57	0.603333	1.91	3.4	1.11	2.14	3.54696		2.59	1.19	0	1.26	0	3.9	0	1.3	1.03175
Gm447			1.19	1.32	1	1.17	3.42	4.37	2.15	3.31333	2.83191		2.15	1.75	1.82	1.90667	1.44	2.77	1.76	1.99	1.04371
Fam84a			4.54	6.93	4.54	5.33667	34.47	36.79	65.37	45.5433	8.53404		7.72	6.6	9.59	7.97	7.92	7.62	10.17	8.57	1.07528
C130022K22Rik			9.72	9.53	9.06	9.43667	17.83	33.08	24.66	25.19	2.66937		11.34	10	9.73	10.3567	10.95	11.42	11.26	11.21	1.08239
BC037034			3.57	0	3.43	2.33333	3.82	4.08	9.95	5.95	2.55		0	7.14	0	2.38	0	7.79	0	2.59667	1.09104
D030056L22Rik			7	12.06	8.01	9.02333	15.48	28.04	42.77	28.7633	3.18766		13.49	14.12	16.38	14.6633	15.59	17.36	15.66	16.2033	1.10502
1810046K07Rik			2.04	2.55	12.93	5.84	4.07	5.34	38.36	15.9233	2.7266		1.67	1.4	1.33	1.46667	1.8	1.4	1.72	1.64	1.11818
AC166169.1			0	0	0.08	0.0266667	0.06	0.28	0.1	0.146667	5.5		0	0.16	0	0.0533333	0.12	0	0.06	0.06	1.125
Gm6483			44.41	35.73	34.73	38.29	104.78	164.66	112.24	127.227	3.32271		40.08	40.69	52.47	44.4133	49.79	51.32	52.23	51.1133	1.15086
Gm13288			0	0.02	0	0.00666667	0.03	0.11	0.19	0.11	16.5		0	0.06	0	0.02	0.02	0.03	0.02	0.0233333	1.16667
Gramd1b			4.72	1.38	4.34	3.48	9.62	3.27	18.03	10.3067	2.96169		2.87	1.99	1.72	2.19333	4.99	1.38	1.32	2.56333	1.16869
1700057G04Rik			0.71	0.55	2.83	1.36333	1.39	1.67	15.05	6.03667	4.42787		0.3	0.02	0.18	0.166667	0.52	0.05	0.02	0.196667	1.18
4922501C03Rik			1.76	1.93	1.9	1.86333	6.27	8.86	7.19	7.44	3.99284		2.12	2.86	2.46	2.48	3.24	3.34	2.5	3.02667	1.22043
1810032O08Rik			5.16	4.1	3.27	4.17667	13.9	46.79	17.9	26.1967	6.27215		5.34	5.43	6.17	5.64667	6.43	7.4	6.95	6.92667	1.22668
AA415398			0.68	1.17	1.22	1.02333	1.53	2.88	3.4	2.60333	2.54397		1.21	1.22	0.92	1.11667	1.54	1.53	1.06	1.37667	1.23284
A630007B06Rik			5.88	5.12	6.35	5.78333	13.87	13.06	17.71	14.88	2.57291		5.1	6.31	5.52	5.64333	7.31	7.26	6.33	6.96667	1.23449
AC124433.1			0.64	0.71	0.53	0.626667	1.21	2.22	1.81	1.74667	2.78723		0.76	0.92	1.04	0.906667	0.79	1.3	1.27	1.12	1.23529
Gm129			6.23	3.78	2.45	4.15333	19.88	24.73	38.38	27.6633	6.66051		4.64	4.42	3.69	4.25	4.64	5.53	5.7	5.29	1.24471
D17H6S56E-3			0.09	0.03	0.06	0.06	0.14	0.2	0.13	0.156667	2.61111		0.04	0.03	0.1	0.0566667	0.03	0.08	0.11	0.0733333	1.29412
Zufsp			3.68	3.61	2.97	3.42	7.48	14.59	10.28	10.7833	3.15302		2.56	3.04	4.03	3.21	3.58	4.69	4.34	4.20333	1.30945
Tex12			0.26	0.16	0.25	0.223333	0.28	0.41	1	0.563333	2.52239		0.37	0.3	0.23	0.3	0.38	0.54	0.26	0.393333	1.31111
Armc7			1.96	2.4	2.66	2.34	4.74	5.7	8.16	6.2	2.64957		2.88	2.72	2.07	2.55667	3.63	3.35	3.17	3.38333	1.32334
Cml3			0.39	0	0	0.13	0.63	0.89	0.18	0.566667	4.35897		0.85	0.78	0	0.543333	1.73	0.43	0	0.72	1.32515
Ggnbp2			45.36	44.56	43.34	44.42	116.16	114.58	115.84	115.527	2.60078		40.3	41.27	43.46	41.6767	59.66	56.35	50.43	55.48	1.3312
Gm88			0.06	0.08	0.08	0.0733333	0.27	0.36	0.4	0.343333	4.68182		0.05	0.14	0.1	0.0966667	0.05	0.12	0.22	0.13	1.34483
Gm9900			0.86	0.22	0.55	0.543333	1.48	1.25	1.61	1.44667	2.66258		0.34	0.51	0.88	0.576667	0.71	0.86	0.79	0.786667	1.36416
BC049715			0.04	0.01	0.04	0.03	0.09	0.06	0.18	0.11	3.66667		0.05	0.13	0.03	0.07	0.12	0.12	0.05	0.0966667	1.38095
Itfg2			6.49	5.33	4.98	5.6	14.73	21.66	15.8	17.3967	3.10655		7.05	7.25	6.68	6.99333	10.43	10.11	8.65	9.73	1.39133
2310014L17Rik			0.09	0.1	0.06	0.0833333	0.12	0.28	0.24	0.213333	2.56		0.13	0.13	0.08	0.113333	0.16	0.15	0.17	0.16	1.41176
Ccdc162			0.22	0.22	0.11	0.183333	0.51	0.71	0.29	0.503333	2.74545		0.52	0.38	0.55	0.483333	0.65	0.53	0.87	0.683333	1.41379
Spata1			0.18	0.27	0.17	0.206667	0.65	0.96	0.82	0.81	3.91935		0.28	0.2	0.22	0.233333	0.3	0.3	0.4	0.333333	1.42857
Ng23			0.17	0.15	0.07	0.13	0.54	1.07	0.98	0.863333	6.64103		0.1	0.1	0.29	0.163333	0.21	0.16	0.33	0.233333	1.42857
AC125099.1			0.02	0.16	0.12	0.1	0.34	0.37	0.93	0.546667	5.46667		0.03	0.04	0.14	0.07	0.14	0.12	0.05	0.103333	1.47619
4933421E11Rik			3.71	3.6	4.5	3.93667	8.87	9.92	13.6	10.7967	2.74259		3.4	3.82	3.91	3.71	6.35	5.34	4.84	5.51	1.48518
A430107O13Rik			0.08	0.15	0.06	0.0966667	0.27	0.41	0.21	0.296667	3.06897		0.14	0.11	0.17	0.14	0.19	0.17	0.27	0.21	1.5
Anxa10			0.82	2.58	4.06	2.48667	3.87	4.43	12.33	6.87667	2.76542		1.11	0.93	1.48	1.17333	1.8	0.88	2.63	1.77	1.50852
2700007P21Rik			6.65	4.64	3.86	5.05	29.79	38.28	20.74	29.6033	5.86205		4.45	4.16	4.85	4.48667	7.16	7.26	5.91	6.77667	1.5104
1700094D03Rik			0.97	0.98	1.09	1.01333	1.95	3.78	3.01	2.91333	2.875		1.28	1.14	1.21	1.21	1.66	2.23	1.74	1.87667	1.55096
Fam84b			32.67	26.89	23.39	27.65	78.79	65.99	67.43	70.7367	2.55829		23.96	27.72	28.14	26.6067	44.35	44.1	37.17	41.8733	1.57379
4922505G16Rik			0.11	0.11	0.11	0.11	0.13	0.47	0.23	0.276667	2.51515		0.15	0.19	0.17	0.17	0.17	0.37	0.27	0.27	1.58824
4933427I04Rik			0.17	0.27	0.33	0.256667	0.35	1.94	2.45	1.58	6.15584		0.26	0.27	0.22	0.25	0.26	0.45	0.51	0.406667	1.62667
Gm9982			0.44	0.32	0.32	0.36	1.42	0.82	0.96	1.06667	2.96296		0.53	0.26	0.2	0.33	0.62	0.61	0.45	0.56	1.69697
Tmem56			3.99	2.41	2.82	3.07333	10.34	7.22	8.2	8.58667	2.79393		2.77	3.78	3.05	3.2	5.79	5.77	4.74	5.43333	1.69792
4932425I24Rik			0.04	0.05	0.02	0.0366667	0.17	0.23	0.19	0.196667	5.36364		0.15	0.09	0.13	0.123333	0.29	0.17	0.2	0.22	1.78378
D330041H03Rik			0.1	0.6	0.23	0.31	0.78	0.5	1.31	0.863333	2.78495		0.21	0.58	0.47	0.42	0.97	0.21	1.12	0.766667	1.8254
2810474O19Rik			4.44	5.61	4.07	4.70667	5.69	18.35	12.08	12.04	2.55807		5.13	6.22	7.7	6.35	9.2	13.61	12.02	11.61	1.82835
AC025794.1			0.19	0.17	0.22	0.193333	0.76	0.59	0.24	0.53	2.74138		0.21	0.26	0.24	0.236667	0.36	0.42	0.52	0.433333	1.83099
Ypel5			4.02	7.55	7.55	6.37333	10.54	17.24	24.98	17.5867	2.75941		9.35	7.41	5.94	7.56667	17.7	15.05	10.37	14.3733	1.89956
1110012J17Rik			0.05	0.08	0.05	0.06	0.2	0.2	0.15	0.183333	3.05556		0.08	0.11	0.17	0.12	0.11	0.22	0.37	0.233333	1.94444
1500012F01Rik			44.49	98.75	49.46	64.2333	237.56	532.67	257.38	342.537	5.33269		91.08	92.35	106.78	96.7367	178.73	210.14	190.27	193.047	1.99559
Tmem200b			0.03	0.06	0.03	0.04	0.11	0.09	0.2	0.133333	3.33333		0	0.03	0	0.01	0	0.06	0	0.02	2
Gm9571			0.05	0.02	0.03	0.0333333	0.28	0.11	0.14	0.176667	5.3		0.02	0.05	0.03	0.0333333	0.04	0.04	0.12	0.0666667	2
Gm7461			0.11	0.11	0.24	0.153333	0.19	0.52	0.69	0.466667	3.04348		0.09	0.08	0.13	0.1	0.21	0.33	0.1	0.213333	2.13333
Armcx6			0.04	0.07	0.03	0.0466667	0.14	0.28	0.09	0.17	3.64286		0.03	0.01	0.03	0.0233333	0.03	0.05	0.07	0.05	2.14286
Gm5250			2.5	0.46	1.69	1.55	6.6	1.51	3.81	3.97333	2.56344		0.32	0.29	0	0.203333	0.33	0.64	0.34	0.436667	2.14754
BC016579			8.01	5.54	5.29	6.28	35.49	27.08	33.58	32.05	5.1035		5.78	5.64	7.16	6.19333	12.79	16.2	12.76	13.9167	2.24704
1700047G07Rik			1.18	0.73	0.85	0.92	3.34	1.28	2.46	2.36	2.56522		1.15	2.12	2.14	1.80333	3.79	5.14	3.67	4.2	2.32902
A330021E22Rik			0.15	0.09	0.06	0.1	0.5	0.28	0.24	0.34	3.4		0.06	0.07	0.02	0.05	0.1	0.15	0.12	0.123333	2.46667
Gm10645			0.65	1.43	1.27	1.11667	1.25	1.85	2.36	1.82	1.62985		1.11	1.57	1.14	1.27333	2.96	3.81	2.8	3.19	2.50524
2310042D19Rik			0.35	0.09	0.14	0.193333	0.61	0.28	0.27	0.386667	2		0.09	0.3	0.13	0.173333	0.38	0.41	0.52	0.436667	2.51923
Gm527			0.2	0.57	0.34	0.37	0.16	0.49	0.34	0.33	0.891892		0.76	0.47	0.61	0.613333	1.68	1.5	1.49	1.55667	2.53804
Ypel1			0.12	0.25	0.14	0.17	0.12	0.15	0.12	0.13	0.764706		0.31	0.43	0.34	0.36	0.71	1.08	0.99	0.926667	2.57407
Gramd1a			0.21	0.44	0.21	0.286667	0.13	0.4	0.31	0.28	0.976744		0.21	0.31	0.16	0.226667	0.4	0.98	0.38	0.586667	2.58824
AC136004.1			0.15	0.1	0.14	0.13	0.2	0.22	0.15	0.19	1.46154		0.11	0.14	0.33	0.193333	0.45	0.59	0.48	0.506667	2.62069
Gm10391			0.19	0	0.09	0.0933333	1.02	0.73	0.65	0.8	8.57143		0	0	0.08	0.0266667	0	0.14	0.07	0.07	2.625
Gm5148			0.09	0.16	0.37	0.206667	0.14	0.45	0.76	0.45	2.17742		0.17	0.15	0.16	0.16	0.51	0.53	0.24	0.426667	2.66667
E330020D12Rik			0.09	0.14	0.17	0.133333	0.17	0.25	0.47	0.296667	2.225		0.14	0.25	0.39	0.26	0.48	0.98	0.62	0.693333	2.66667
1700029I15Rik			0.45	0.28	0.33	0.353333	0.33	0.12	0.7	0.383333	1.08491		0.3	0.14	0.08	0.173333	0.46	0.3	0.63	0.463333	2.67308
A930001N09Rik			1.13	3.71	4.37	3.07	0.83	4.84	9.13	4.93333	1.60695		3.56	4.18	4.21	3.98333	10.68	12.43	9.06	10.7233	2.69205
Fam107b			38.36	41.63	21.7	33.8967	43.83	63.32	47.39	51.5133	1.51972		29.22	31.71	40.31	33.7467	55.45	121.63	98.75	91.9433	2.72452
A430110N23Rik			0.06	0.03	0.01	0.0333333	0.16	0.07	0.05	0.0933333	2.8		0.05	0.03	0.04	0.04	0.03	0.07	0.23	0.11	2.75
AC119211.2			1.11	0.38	0	0.496667	0.4	0.42	0	0.273333	0.550336		0	0	0.9	0.3	1.64	0	0.85	0.83	2.76667
Gm10947			0.2	0.03	0.06	0.0966667	0.09	0.07	0.27	0.143333	1.48276		0.06	0.06	0.14	0.0866667	0.13	0.32	0.27	0.24	2.76923
Gm9781			0	0.73	0	0.243333	0.38	0.6	0.16	0.38	1.56164		0	0	0.43	0.143333	0.39	0	0.81	0.4	2.7907
Tmem163			0.09	0.06	0.1	0.0833333	0.06	0.05	0.11	0.0733333	0.88		0.11	0.1	0.03	0.08	0.28	0.15	0.24	0.223333	2.79167
AA986860			6.32	9.71	9.3	8.44333	6.58	9.41	9.6	8.53	1.01026		9.5	9.57	10.33	9.8	27.36	31.09	25.93	28.1267	2.87007
Chi3l7			0	0.03	0	0.01	0	0	0.02	0.00666667	0.666667		0.02	0.06	0.05	0.0433333	0.02	0.19	0.17	0.126667	2.92308
9330154J02Rik			0.2	0.09	0.15	0.146667	0.06	0.06	0.11	0.0766667	0.522727		0.08	0.04	0.05	0.0566667	0.15	0.21	0.16	0.173333	3.05882
Tuft1			10.26	12.36	11.48	11.3667	20.23	30.91	34.13	28.4233	2.50059		15.33	14.99	21.48	17.2667	36.94	79.63	47.38	54.65	3.16506
AC149585.1			0.13	0.1	0.05	0.0933333	0.08	0.09	0.16	0.11	1.17857		0.04	0.06	0.1	0.0666667	0.24	0.2	0.2	0.213333	3.2
Gm10382			1.4	1.78	0.63	1.27	2.08	1.36	1.6	1.68	1.32283		0.43	0.8	0.37	0.533333	1.25	2.62	1.28	1.71667	3.21875
Gm10638			0.05	0.03	0.32	0.133333	0.19	0.12	0.61	0.306667	2.3		0.16	0.06	0.04	0.0866667	0.37	0.3	0.17	0.28	3.23077
1110028C15Rik			1.22	1.55	1.31	1.36	2.99	4.22	6.41	4.54	3.33824		1.17	1.29	1.33	1.26333	3.78	5.3	3.51	4.19667	3.3219
A730020M07Rik			0	0	0.02	0.00666667	0.1	0.03	0.03	0.0533333	8		0.05	0.02	0.17	0.08	0.18	0.18	0.46	0.273333	3.41667
A930016O22Rik			0.03	0.05	0.05	0.0433333	0	0.09	0.07	0.0533333	1.23077		0.06	0	0.03	0.03	0.11	0.08	0.12	0.103333	3.44444
2010002M12Rik			7.6	1.39	9.71	6.23333	15.65	8.52	45.65	23.2733	3.73369		9.49	6.84	3.99	6.77333	41.74	17.76	11.15	23.55	3.47687
Gm16378			0.86	0.4	0.37	0.543333	0.92	0.98	1.33	1.07667	1.9816		0.62	0.19	0.23	0.346667	1.7	0.63	1.33	1.22	3.51923
Gm10800			0.38	0.13	0.3	0.27	0.88	0.58	0.41	0.623333	2.30864		0.27	0.13	0.31	0.236667	0.7	0.83	1.02	0.85	3.59155
2010109A12Rik			0.13	0.31	0.25	0.23	0.39	0.44	0.42	0.416667	1.81159		0.19	0.04	0.05	0.0933333	0.19	0.19	0.64	0.34	3.64286
C630050I24Rik			0.04	0.02	0	0.02	0.03	0.23	0.14	0.133333	6.66667		0	0.06	0.04	0.0333333	0.1	0.1	0.17	0.123333	3.7
AC118682.1			0.05	0	0	0.0166667	0.22	0.12	0	0.113333	6.8		0	0	0.12	0.04	0.22	0	0.23	0.15	3.75
1700001P01Rik			0	0.04	0	0.0133333	0.08	0.13	0.09	0.1	7.5		0	0.04	0.05	0.03	0.04	0.08	0.22	0.113333	3.77778
Gm3086			0.04	0	0	0.0133333	0.14	0.05	0.06	0.0833333	6.25		0.05	0.04	0.05	0.0466667	0.15	0.29	0.1	0.18	3.85714
Rpl21-ps6			0.52	0.54	0	0.353333	0.18	0	0.48	0.22	0.622642		0.38	0	0	0.126667	0.38	1.13	0	0.503333	3.97368
8430408G22Rik			0.03	0.56	0.17	0.253333	0.04	0.84	0.2	0.36	1.42105		0.17	0.49	1.23	0.63	0.64	4.07	3.03	2.58	4.09524
Gm9964			0.08	0.02	0.09	0.0633333	0.14	0.04	0.07	0.0833333	1.31579		0	0.08	0	0.0266667	0.08	0.08	0.18	0.113333	4.25
Gm12689			0.01	0.03	0.07	0.0366667	0.03	0.03	0.19	0.0833333	2.27273		0.06	0.03	0	0.03	0.13	0.19	0.07	0.13	4.33333
4732471J01Rik			0.21	0.17	0.32	0.233333	0.13	0	0.08	0.07	0.3		0	0.08	0	0.0266667	0.09	0.09	0.19	0.123333	4.625
AL590633.1			0.05	0.13	0.1	0.0933333	0	0.06	0.12	0.06	0.642857		0	0.1	0.06	0.0533333	0.28	0.11	0.41	0.266667	5
1700102P08Rik			0.14	0.13	0.09	0.12	0.87	0.39	0.55	0.603333	5.02778		0.16	0.1	0.05	0.103333	0.41	0.69	0.47	0.523333	5.06452
4933413G19Rik			0.02	0.02	0.02	0.02	0.07	0.09	0.06	0.0733333	3.66667		0	0.04	0.03	0.0233333	0.05	0.14	0.17	0.12	5.14286
Shd			0.04	0.01	0.03	0.0266667	0.05	0.08	0.07	0.0666667	2.5		0.05	0.03	0.02	0.0333333	0.14	0.19	0.2	0.176667	5.3
2410066E13Rik			0.12	0.23	0.06	0.136667	0.1	0.05	0.19	0.113333	0.829268		0.18	0.23	0.16	0.19	0.7	1.21	1.19	1.03333	5.4386
AC156021.1			0	0.12	0.05	0.0566667	0.12	2.53	1.74	1.46333	25.8235		0	0.23	0	0.0766667	0.38	0.87	0.26	0.503333	6.56522
Sertad4			0.25	0.72	0.39	0.453333	0.81	0.54	0.34	0.563333	1.24265		0.17	0.13	0.27	0.19	0.43	1.78	1.61	1.27333	6.70175
Crybb3			0.21	0	0.11	0.106667	0.18	0.06	0.04	0.0933333	0.875		0.09	0.2	0.07	0.12	1.06	0.64	0.87	0.856667	7.13889
AC148006.1			0.06	0	0.06	0.04	0	0.21	0.17	0.126667	3.16667		0	0	0	0	0.13	0	0	0.0433333	#DIV/0!
AL596125.1			0.14	0.21	0.13	0.16	0.37	0.08	1.08	0.51	3.1875		0	0	0	0	0	0.15	0	0.05	#DIV/0!
Gm5640			1.34	0	0	0.446667	2.87	1.53	0	1.46667	3.28358		0	0	0	0	0	0	0	0	#DIV/0!
Xlr4b			0	0	0.07	0.0233333	0	0.09	0.22	0.103333	4.42857		0	0	0	0	0	0	0	0	#DIV/0!
AC132362.1			0	0.34	0.31	0.216667	0	0.37	2.71	1.02667	4.73846		0	0	0	0	0	0	0	0	#DIV/0!
Gm15134			0	0	0.07	0.0233333	0.24	0	0.14	0.126667	5.42857		0	0	0	0	0	0	0.17	0.0566667	#DIV/0!
Gm6289			0.06	0	0	0.02	0	0.14	0.25	0.13	6.5		0	0	0	0	0.07	0	0	0.0233333	#DIV/0!
Gm5610			0	0.11	0.1	0.07	0.81	0.74	1	0.85	12.1429		0	0	0	0	0	0.24	0.5	0.246667	#DIV/0!
AC119863.1			0	0.01	0.01	0.00666667	0.19	0.13	0.06	0.126667	19		0	0	0	0	0	0	0	0	#DIV/0!
